# Supplementary material
Source: PubMed Central journal article supplement (PMC3635831)
Supplement: NIHMS449372-supplement-01.pdf [file NIHMS449372-supplement-01.pdf]

Type of file: figure

Label: supplement

Filename: chang 2013 supplemental nature11847-s1.pdf

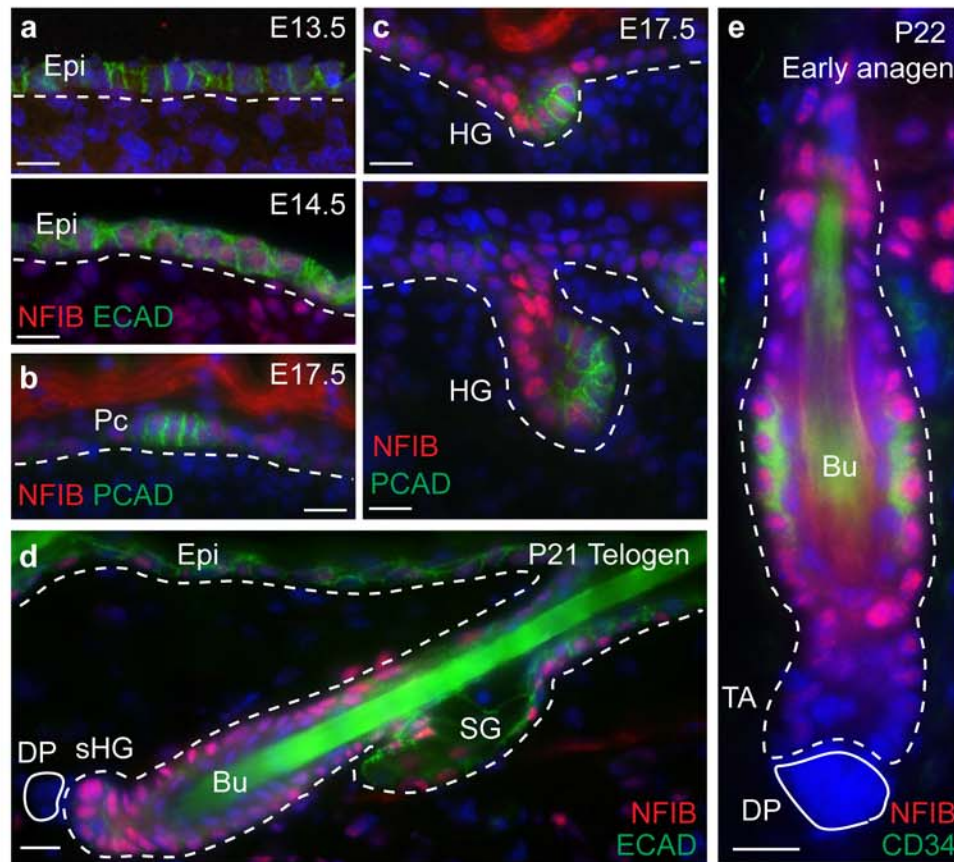

**Supplementary Figure 1 | NFIB is enriched in early HFSC precursors in developing HFs.** Immunofluorescence with indicated antibodies. **a**, NFIB appears in the basal layer of epidermis (Epi) as early as E14.5. **b**, Before or at the onset of epidermal invagination, NFIB is equally expressed in epidermal basal cells. PCAD marks placode (Pc) structure. **c**, As morphogenesis proceeds, NFIB is upregulated in the upper region of hair germ (HG), which is complementary with PCAD and the location of early HFSC precursors. **d**, During telogen, NFIB is enriched in the bulge (Bu) and secondary hair germ (sHG), and expressed at lower level in sebaceous glands (SG) and epidermis (Epi). **e**, At the onset of anagen, NFIB is downregulated in the emerging transit-amplifying population (TA) of committed progenitors close to dermal papilla (DP). Scale bars: 10 μm. ECAD: E-cadherin. PCAD: P-cadherin.

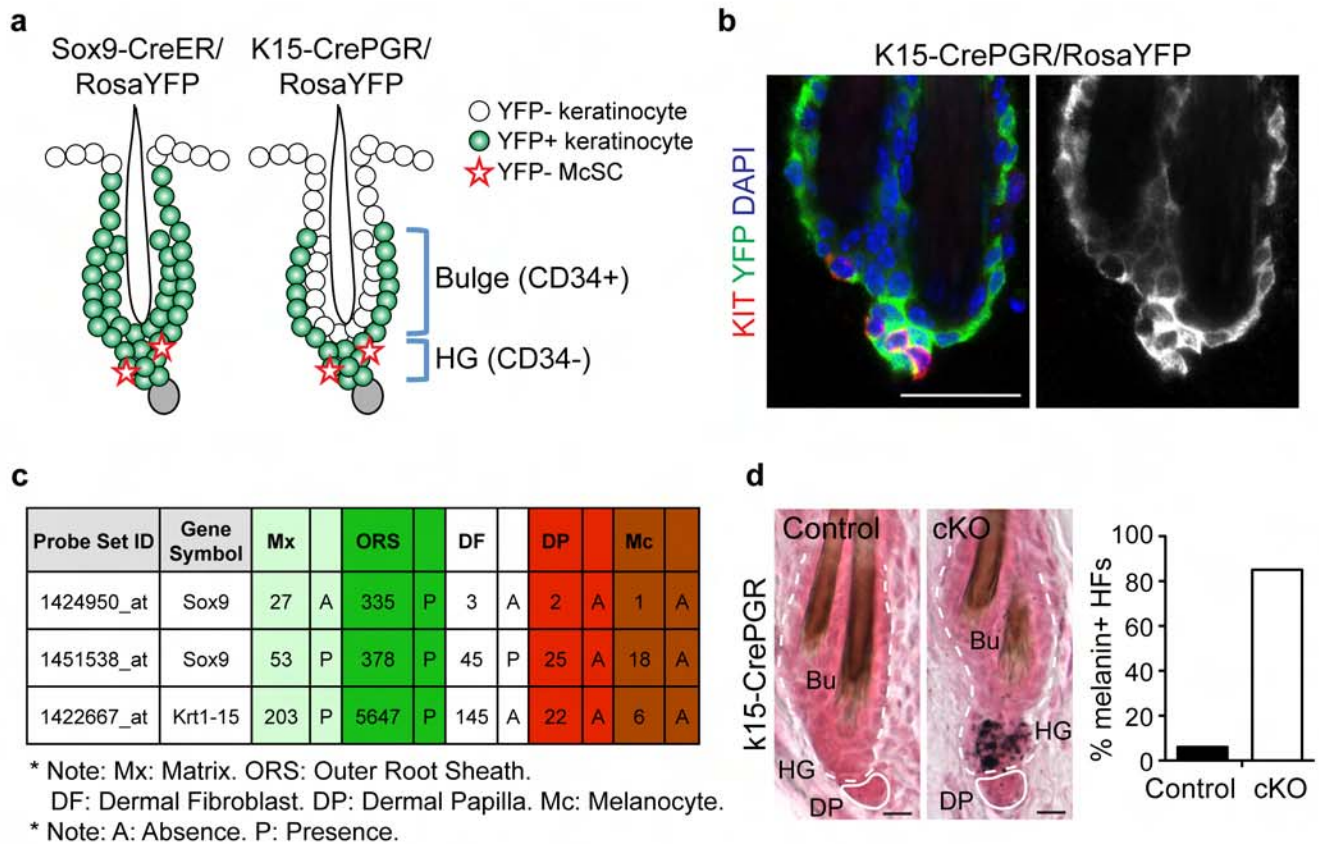

**Supplementary Figure 2 | Two inducible-Cre lines *Sox9-CreER* and *K15-CrePGR*, are used in this study to ablate *Nfib* specifically in HFSCs. **a**, Schematic. *RosaYFP/Cre* reporters show *Sox9-CreER* is active in most of regions in hair follicle and *K15-CrePGR* activity is more specific to the bulge and HG HFSCs after induction. Both are not active in McSCs. **b**, Immunofluorescence of *K15-CrePGR/RosaYFP* reporter with anti-YFP and KIT antibodies. KIT marks melanocytes. **c**, Transcriptional profilings of multiple populations in P4 skin through microarray show *Sox9* and *K15* (*Krt-15*) are expressed in ORS but absent in melanocytes, dermal papilla and dermal fibroblasts. **d**, Ectopic pigmentation phenotype in telogen *K15-CrePGR/Nfib(fl/fl)* cKO HF. Melanin is detected by Fontana-Masson staining. The percentage of HF with pigmented HG were quantified (n=2 mice/experiment, >100 HF were analyzed). Bu: bulge. Scale bars: 25 μm (b); 10 μm (d).**

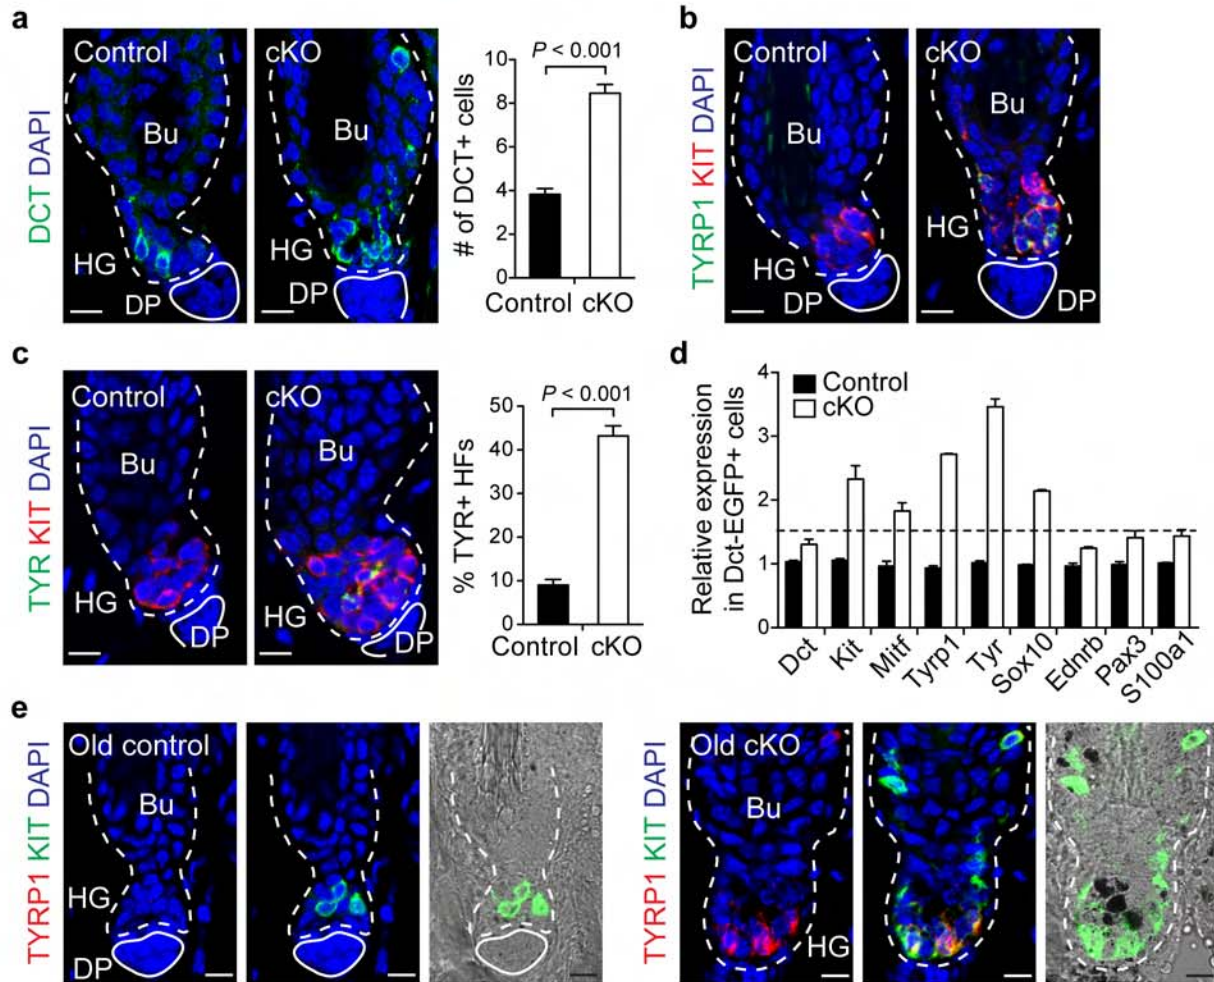

**Supplementary Figure 3 | Increased melanocyte number and ectopic differentiation of McSCs in *Nfib*-cKO HF.** **a-c**, Immunofluorescence with indicated antibodies and quantifications. **(a)** >24 HF from 2 mice/experiment. **(c)**  $n=3$  mice/experiment, >20 HF/mouse. **d**, qPCR on FACS-isolated *Dct*-EGFP<sup>+</sup> melanocytes from *Nfib*-cKO and control skins. **e**, Immunofluorescence from 21 month-old mice. Bu: bulge. Scale bars: 10  $\mu$ m. Error bars indicate s.e.m.

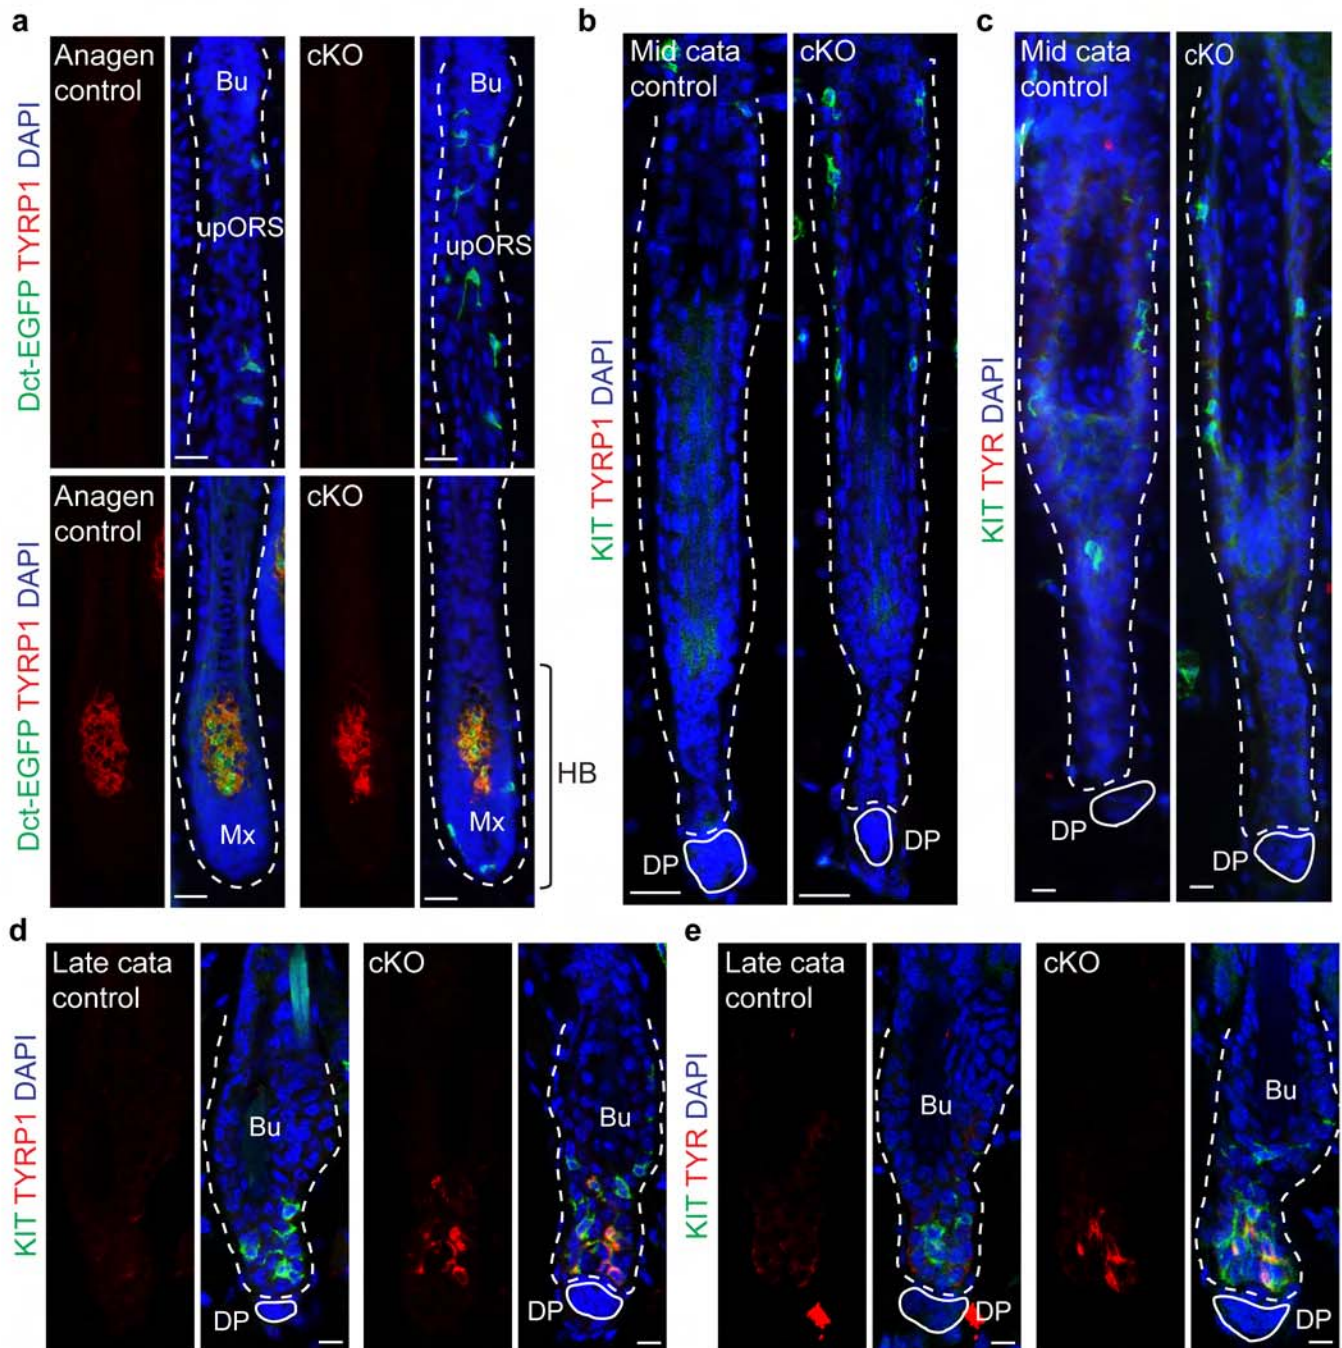

**Supplementary Figure 4 | Ectopic differentiation of McSCs in *Nfib* cKO HF s ceases in anagen when DP moves away from the niche; it returns when DP approaches the niche in late catagen.** Immunofluorescence with indicated antibodies. **a**, *Dct-EGFP* X *Nfib*-cKO and *Dct-EGFP* control mice were used to fluorescently tag melanocytes for purification (McSCs and differentiated melanocytes). In both cKO and control HF s, lineage committed melanocytes (TYRP1<sup>+</sup> *Dct-EGFP*<sup>+</sup>) are only present in the upper matrix (Mx) of hair bulb (HB) but not in the SC niche including the bulge (Bu) and upper ORS (upORS). The number of McSCs is increased in cKO HF s and undifferentiated melanocytes also propagate to lower ORS in anagen. **b-c**, Differentiated melanocytes (TYRP1<sup>+</sup> or TYR<sup>+</sup>) disappear from both cKO and control HF s during mid catagen when the hair bulb, which encases the DP, is degenerated. The DP is spared and draws upward to the SC niche at the end of catagen. **d-e**, During late catagen, melanocytes close to DP precociously express differentiating markers including TYRP1 and TYR. Scale bars: 25  $\mu$ m (a-b); 10  $\mu$ m (c-e).

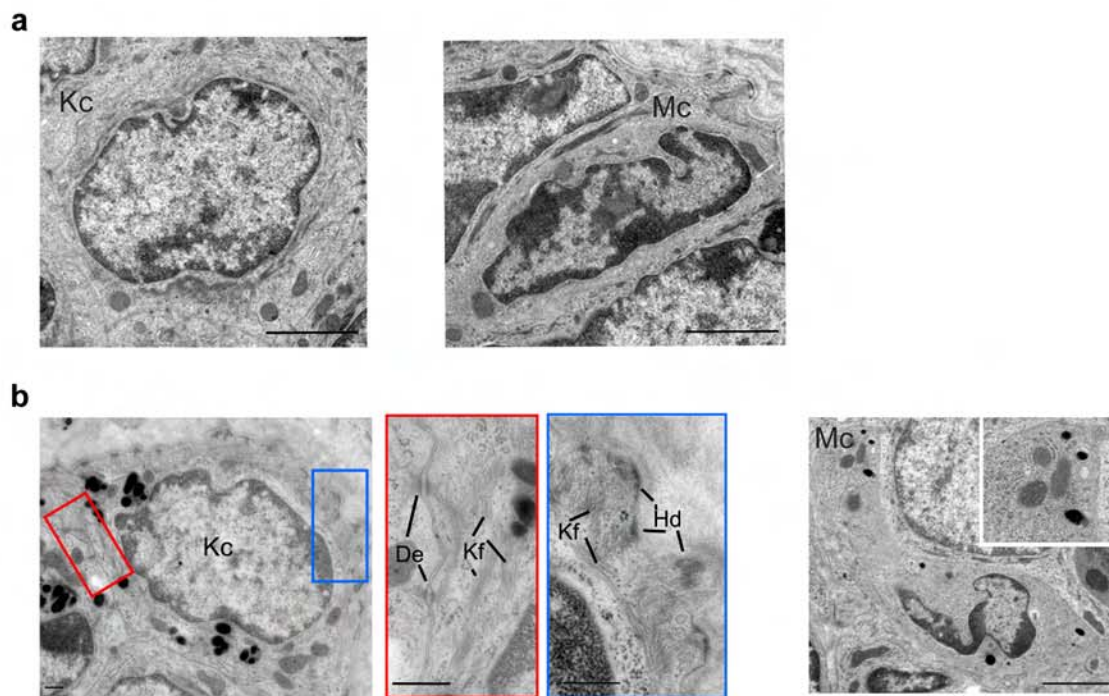

**Supplementary Figure 5 | Ectopic pigmentation in telogen *Nfib*-cKO HFSCs.** High magnifications from Figure 3a. Ultrathin sections of telogen *K15-CrePGR* cKO HF. **a**, Pigment-free HG-HFSC and McSC in the control HF. Kc: keratinocyte. Mc: melanocyte. **b**, Pigment-positive HG-HFSC and melanocyte in *Nfib*-cKO HF. Boxed areas are magnified showing characteristic features of keratinocytes that are absent in melanocytes, including keratin filament bundles (Kf), desmosomes (De) and hemidesmosomes (Hd). Scale bar: 2  $\mu$ m (a) and (Mc in b); 0.5  $\mu$ m (Kc in b).

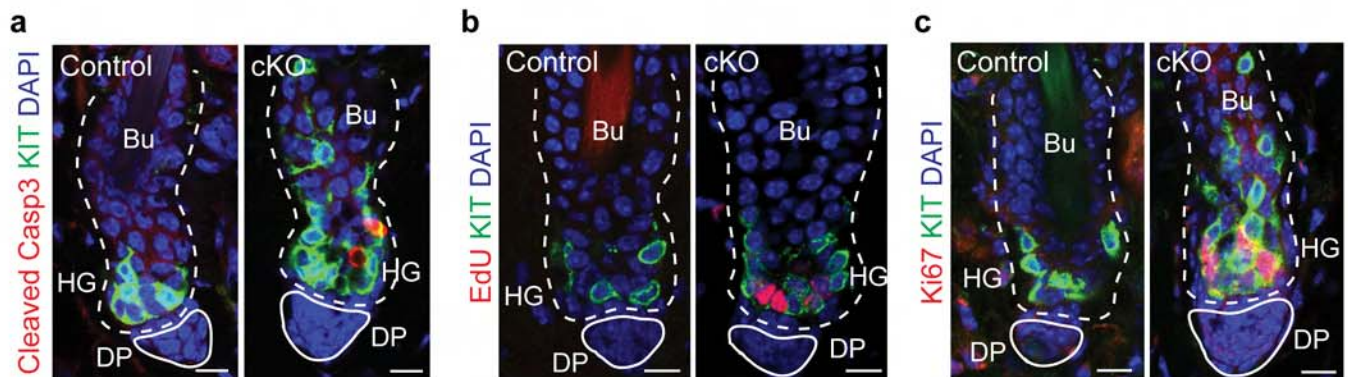

**Supplementary Figure 6 | Apoptotic and proliferative cells in *Nfib* cKO HF are not  $KIT^+$  melanocytes.** Immunofluorescence with indicated antibodies. **a**, Apoptotic cells marked by cleaved caspase 3 in cKO HF are not  $KIT^+$ . **b-c**,  $EdU^+$  or  $Ki67^+$  cells in cKO HF are not  $KIT^+$  melanocytes. Bu: bulge. Scale bars: 10  $\mu$ m.

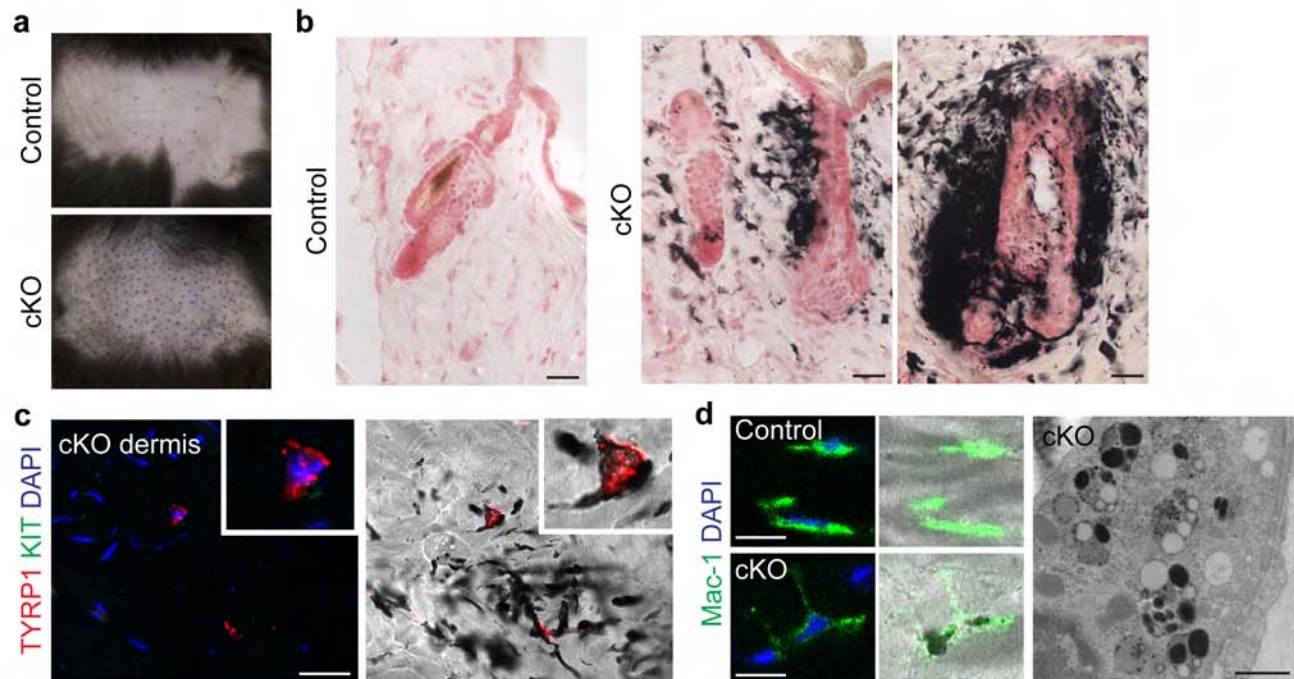

**Supplementary Figure 7 | Hyperpigmentation in the skin of 21 month-old *Nfib* cKO mice.** **a**, Black pigmented spots on the skin surface of *Nfib* cKO mice. **b**, Melanin is detected by *Fontana-Masson* staining. Note hyperpigmentation in the dermis not seen in younger *Nfib*-cKO animals. **c**, TYRP1<sup>+</sup>KIT<sup>-</sup> dermal melanocytes in *Nfib* cKO skin and could not account for the majority of pigmented cells in the dermis. **d**, Pigmented macrophages marked by Mac-1 and identified by ultrastructural analysis were prevalent in the dermis of old *Nfib*-cKO skin. Scale bars: 25  $\mu$ m (b); 10  $\mu$ m (c,d).



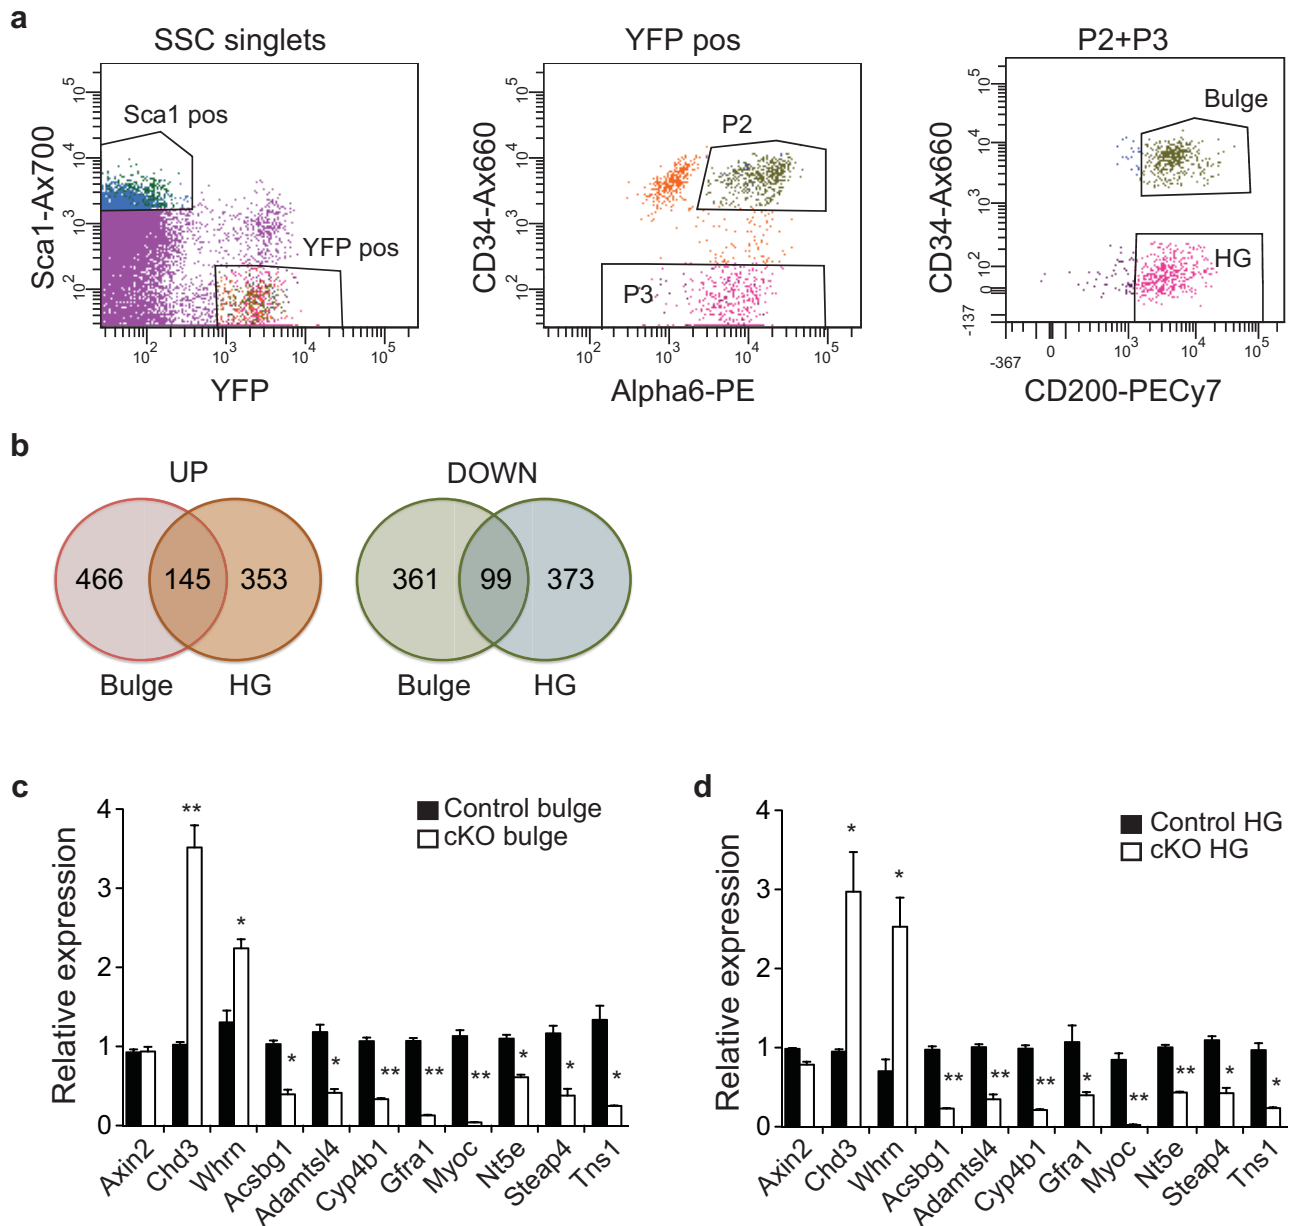

**Supplementary Figure 8 | Isolation of bulge and HG HFSCs from *Nfib* het and cKO skins for RNA-seq and qPCR analysis.** **a**, FACS isolation. Bulge HFSCs were isolated with markers YFP<sup>+</sup> Sca1<sup>-</sup>  $\alpha 6^{\text{high}}$  CD34<sup>+</sup> CD200<sup>+</sup>; HG HFSCs with the same markers but CD34<sup>-</sup>. **b**, Venn diagrams representing gene expression changes in cKO bulge/HG cells compared to control by RNA-seq analysis ( $\geq 2$ -fold). **c**, qPCR confirms the results from RNA-seq analysis. \* $P < 0.05$ . \*\* $P < 0.001$ . Error bars indicate s.e.m.

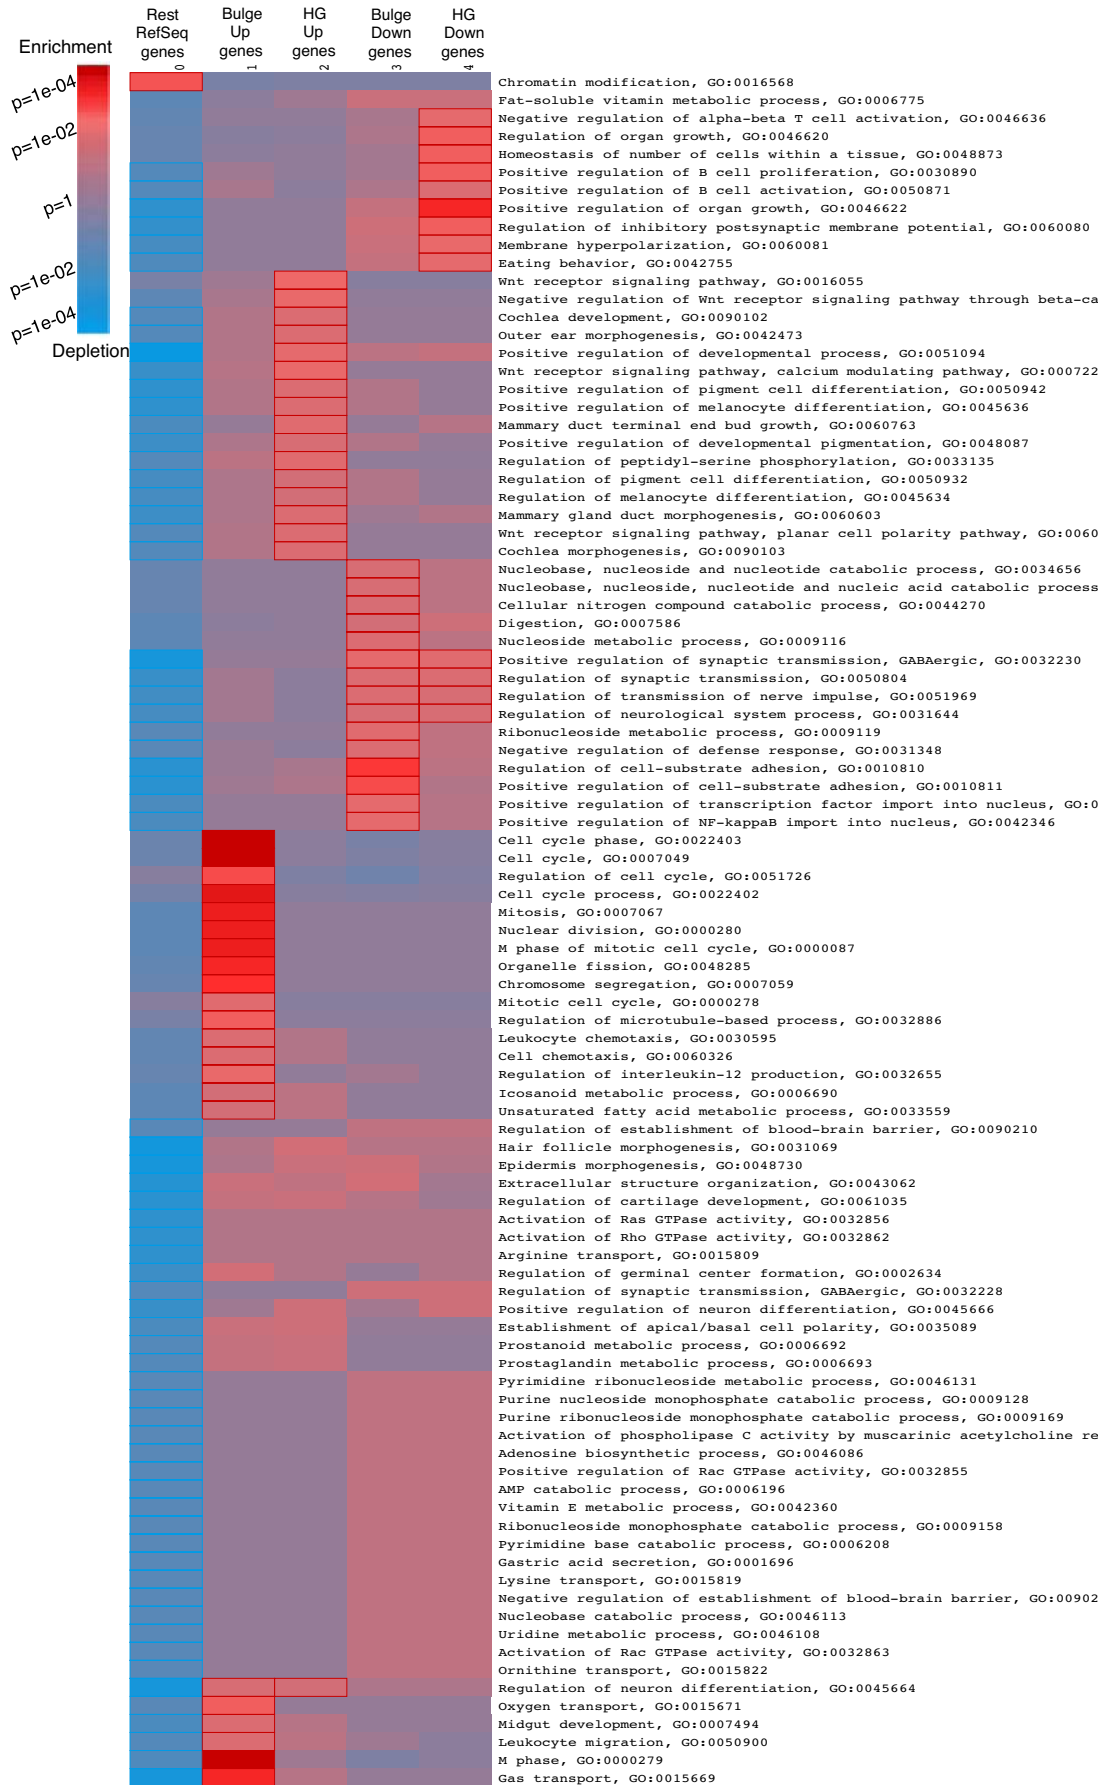

**Supplementary Figure 9 | Pathway analysis.** The heatmap shows the enriched biological processes (Gene Ontology) for the up- or down-regulated genes in *Nfib* cKO bulge and HG HFSCs relative to control in RNA-seq results, compared to the rest of the known genes in RefSeq annotation database. The categories indicate genes over/under expressed in cKO bulge (Bulge Up/Bulge Down), and over/under expressed in HG HFSCs (HG Up/HG Down). Note: for this analysis, we excluded the small subset of pigment mRNAs, which might appear to arise from ectopic melanosome uptake by HFSCs nearest the DP.

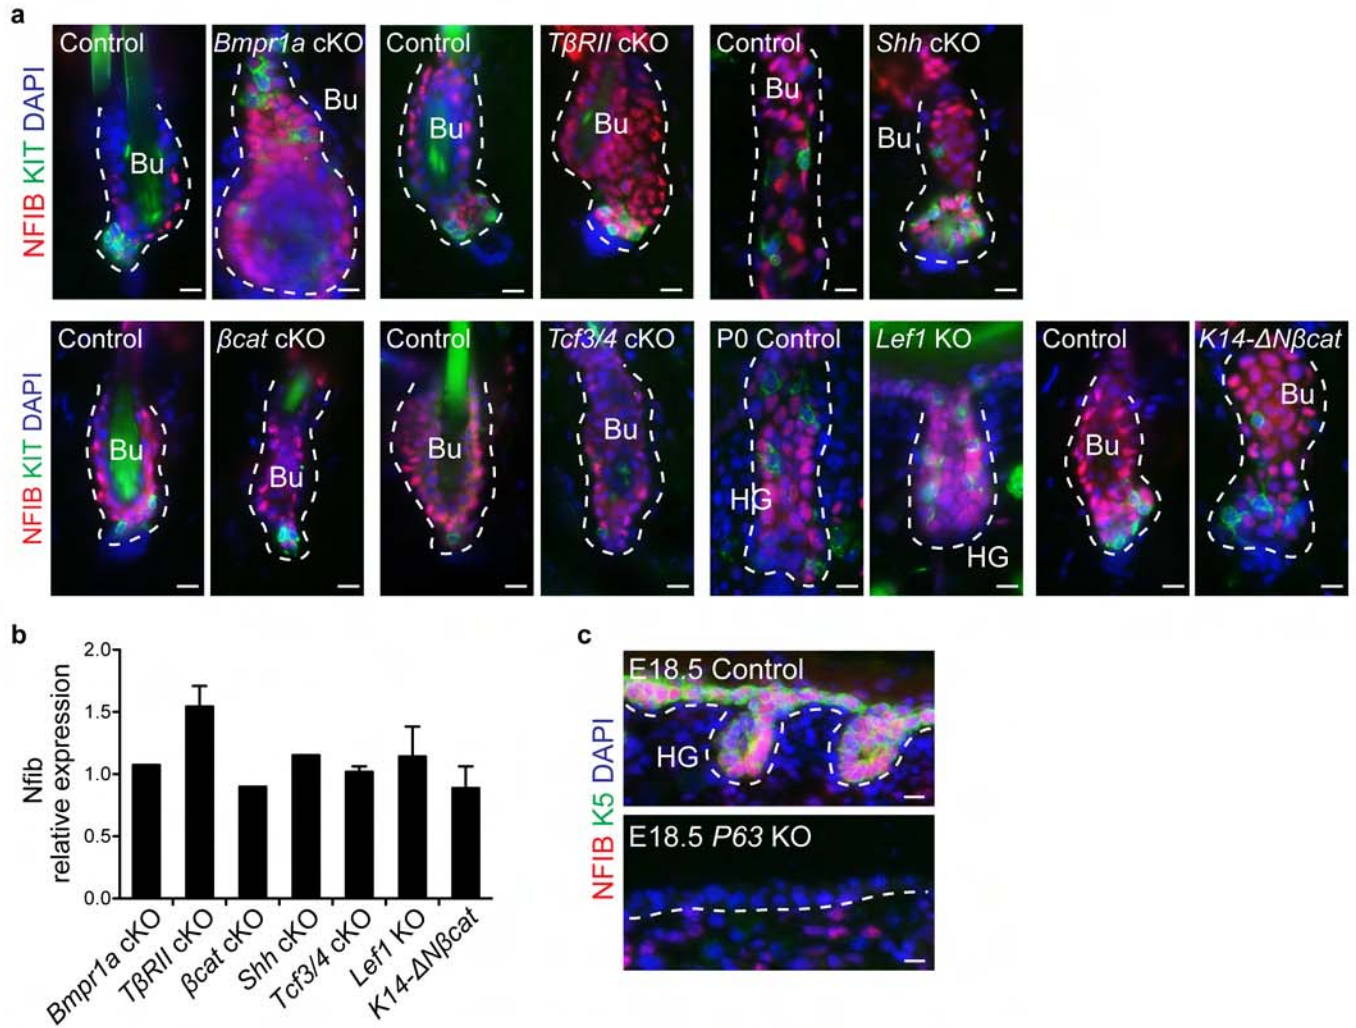

**Supplementary Figure 10 | NFIB expression in different mutants. a,c**, Immunofluorescence with indicated antibodies. Frozen skin sections were from the following genetic backgrounds and where relevant, induced for Cre expression: *K15-CrePGR X Bmpr1a fl/fl*, *K14-Cre X TGFβRII (TβRII) fl/fl*, *K15-CrePGR X Sonic Hedgehog (Shh) fl/fl*, *K15-CrePGR X β-catenin (βcat) fl/fl*, *K15-CrePGR X Tcf3(fl/fl) X Tcf4-null*, *Lef1-null*, *K14-ΔNβcat*. **b**, Relative *Nfib* RNA levels in HFSCs FACS-purified from these different backgrounds ( $CD34^+α6^+$ ) followed by transcriptional profiling analyses (full array databases to be reported elsewhere). The HFs ( $Pcad^+α6^+$ ) were isolated from E17.5 *Lef1* KO and control embryos. Bu: bulge. Scale bars: 10 μm. Error bars indicate s.e.m.

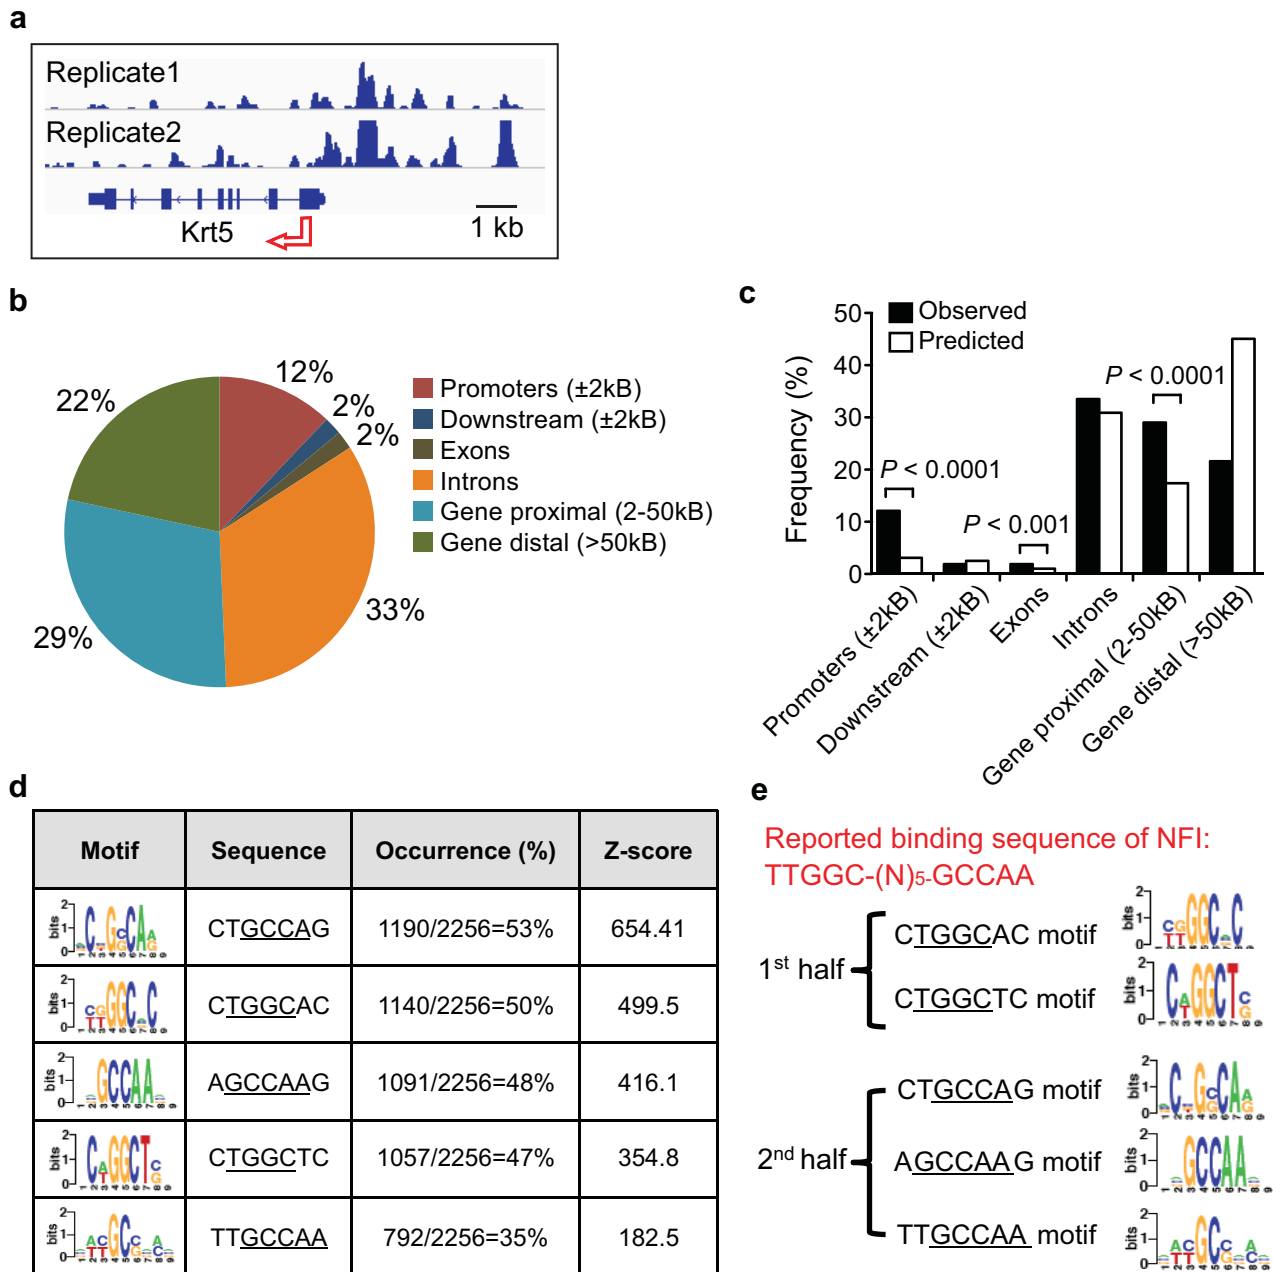

**Supplementary Figure 11 | Genomic distribution of NFIB ChIP-seq peaks and motif analysis. a,** Visualization of NFIB ChIP-seq profiles of *Krt5* promoter. **b,** Genomic distribution of NFIB ChIP-seq peaks relative to RefSeq transcripts. Promoter: within  $\pm 2\text{kB}$  of transcription start site. Downstream: within  $\pm 2\text{kB}$  of transcription end site. Gene proximal: within upstream 2-50kB of transcription start site. Gene distal: beyond upstream 50kB of transcription start site. **c,** Comparison of the observed NFIB bound peak distribution to the predicted distribution based on the genomic representation of each compartment, using the Binomial test. **d,** The motifs discovered from *de novo* motifs analysis using FIRE program are shown. The percentage of NFIB bound peaks occurrences and the corresponding z-scores are indicated for each motif. **e,** The discovered motifs are grouped based on their similarity to reported first and second halves of the NFIB palindromic motif.

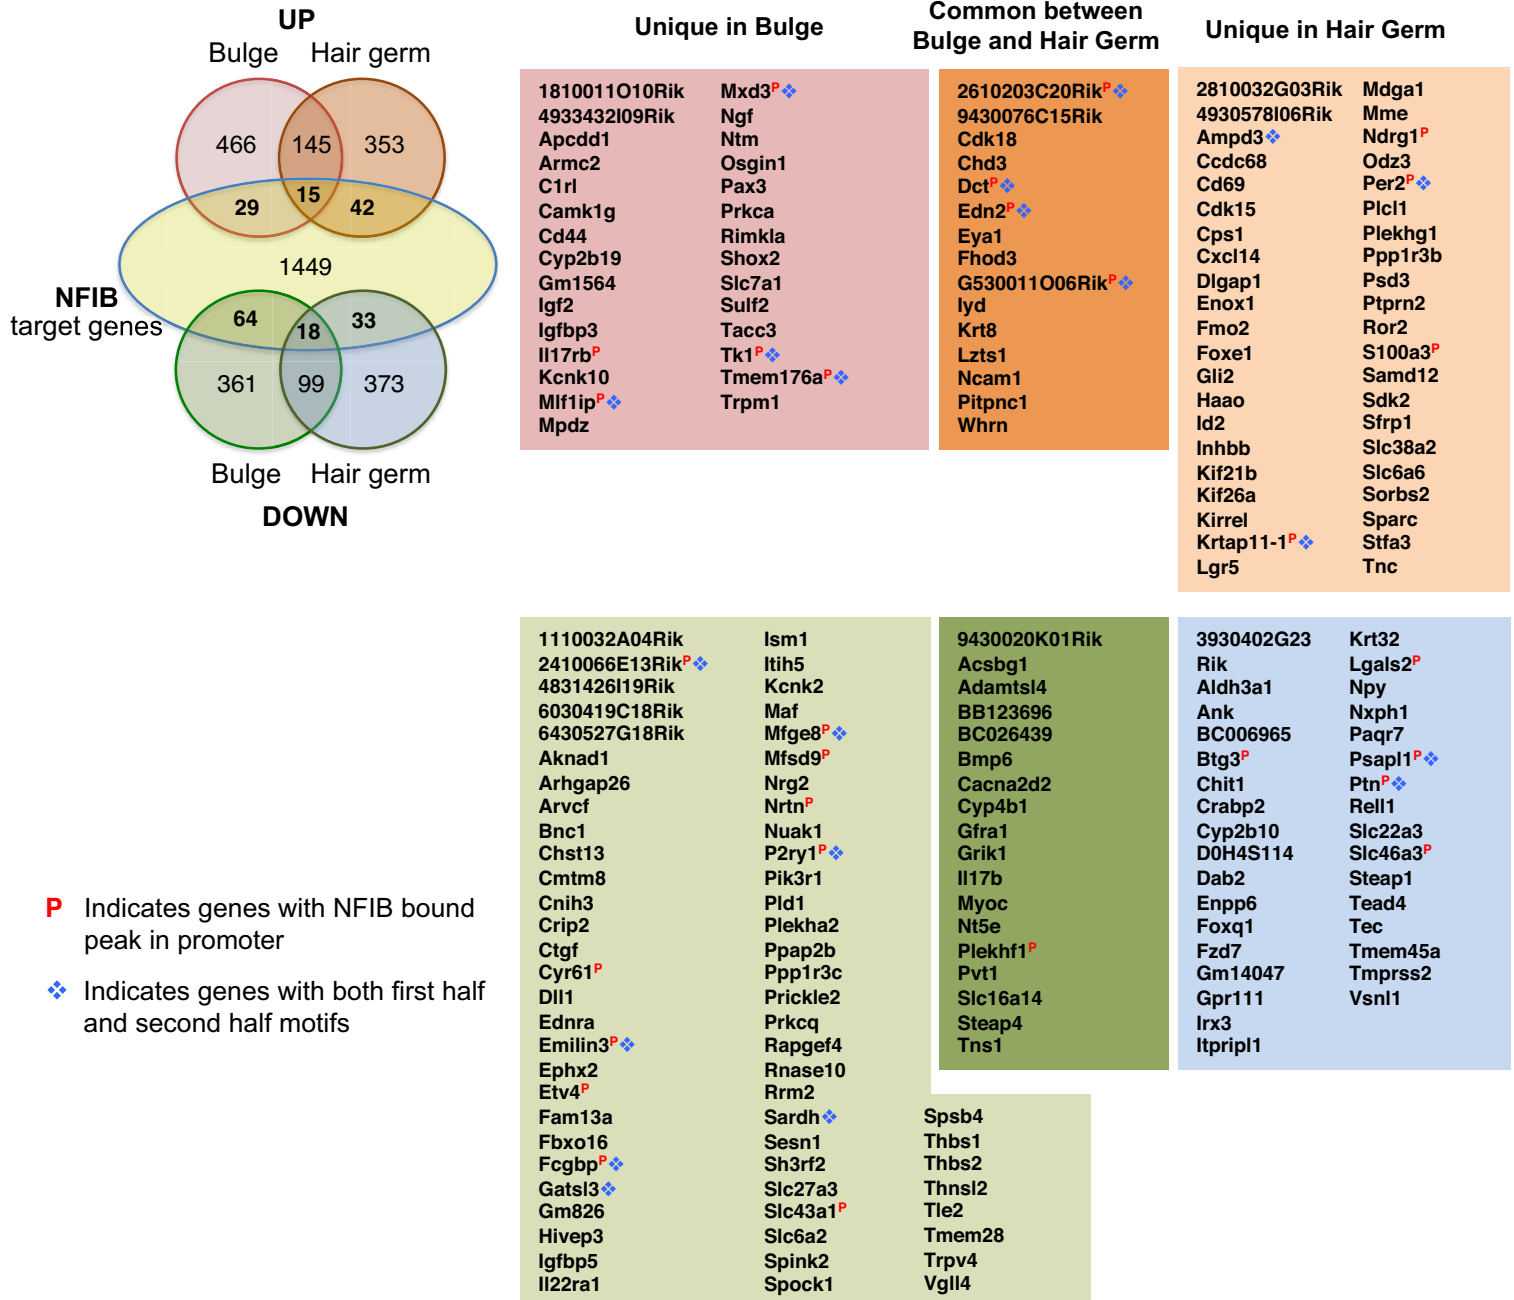

**Supplementary Figure 12 | Identification of direct NFIB target genes in HFSCs whose expression is regulated by NFIB.** The Venn diagram on the left shows the comparison between 1449 NFIB direct target genes from ChIP-seq analysis and genes up or down-regulated in *Nfib* cKO bulge/HG HFSCs from RNA-seq. Genes that are bound by *and* regulated by NFIB are listed. Unique in Bulge or HG means their expression levels are only changed in each population. Common between Bulge and HG indicates genes that are changed in both populations. Genes with NFIB bound peak in their promoter ( $\pm$  2kb from TSS), and with both halves of NFIB palindromic motif are explicitly marked.

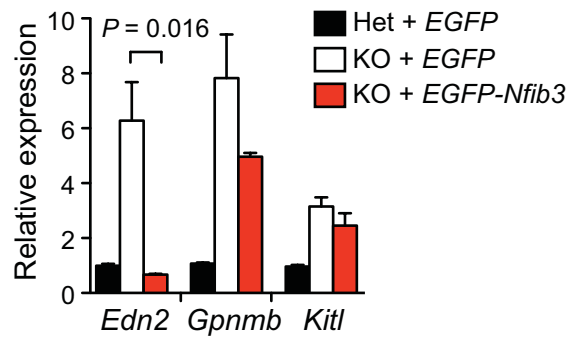

**Supplementary Figure 13 | Regulation of *Edn2* expression by NFIB *in vitro*.** qPCR from *Nfib* het or KO keratinocyte cultures transfected with *EGFP* or *EGFP-Nfib3* transgenes. Values are normalized to het+*EGFP*. Error bars indicate s.e.m.

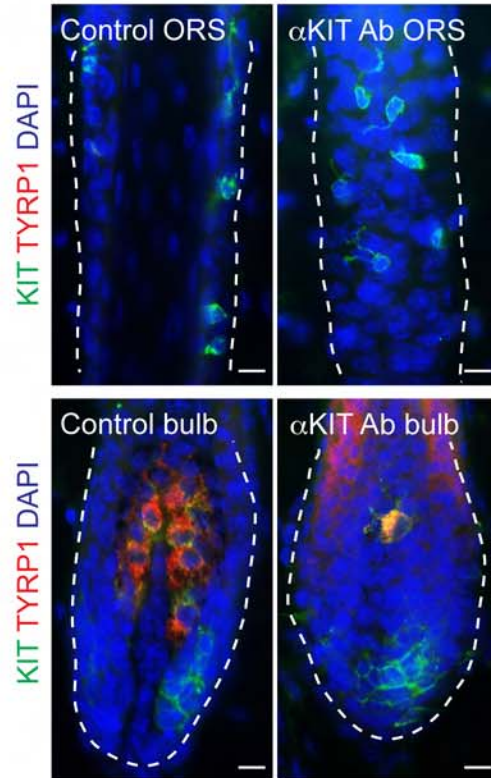

**Supplementary Figure 14 | Inhibition of KIT receptor during anagen in *Nfib*-cKO skins.** Immunofluorescence with indicated antibodies. Note the disappearance of TYRP1<sup>+</sup> mature melanocytes in the hair bulb after  $\alpha$ KIT antibodies treatment during anagen. McSCs in the bulge/ORS were not affected. Scale bars: 10  $\mu$ m.



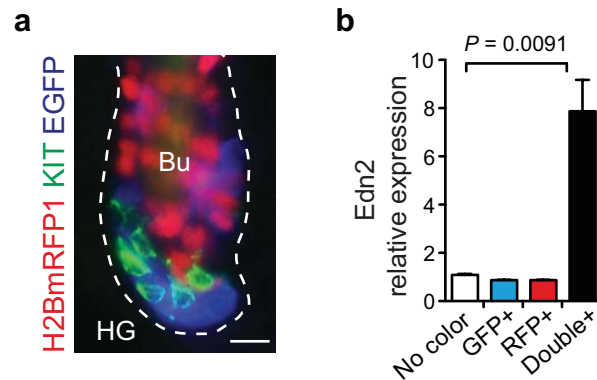

**Supplementary Figure 15 | *Edn2* induction in skin epithelial cells but not melanocytes by *in utero* lentiviral injection.** **a**, Immunofluorescence with KIT and GFP antibodies. As judged by H2BmRFP1/GFP expression, transduction is confined to skin epithelial cells and not seen in KIT<sup>+</sup> McSCs. **b**, Upregulation of *Edn2* in doubly transduced cells examined by qPCR on FACS-isolated populations after 10 or 30 days of feeding on Doxycycline-containing chow (n=3). Values are normalized to no-color control. Bu: bulge. HG: hair germ. Scale bars: 10  $\mu$ m. Error bars indicate s.e.m.

**Supplementary Table 1 | Gene list from RNA-seq analysis for bulge/HG HFSCs from *Nfib* cKO and het skins. Fold change is estimated as log<sub>2</sub> ratio between cKO and WT in Bulge- and HG-HFSCs.**

| Bulge Up      |                                                 | WT Bulge | KO Bulge | WT HG  | KO HG  | Log2 KO Bulge/WT Bulge | Log2 KO HG/WT HG |
|---------------|-------------------------------------------------|----------|----------|--------|--------|------------------------|------------------|
| GENE          | Description                                     |          |          |        |        |                        |                  |
| Mir23b        |                                                 | 0        | 101.69   | 0      | 0      | 6.682151888            | 0                |
| Snord47       |                                                 | 0        | 98.06    | 0      | 184.98 | 6.630230716            | 7.539003674      |
| Snord100      |                                                 | 0        | 92.27    | 86.05  | 80.26  | 6.543341212            | -0.099298933     |
| Mir24-1       |                                                 | 0        | 90.59    | 0      | 0      | 6.517118185            | 0                |
| Mir5117       |                                                 | 0        | 73.77    | 42.16  | 67.79  | 6.224387628            | 0.672503991      |
| Snord2        |                                                 | 0        | 63.97    | 0      | 0      | 6.0217018              | 0                |
| Slc15a2       | solute carrier family 15 member 2 isoform 2     | 0        | 53.71    | 0      | 65.66  | 5.773732651            | 6.058749412      |
| Mir3058       |                                                 | 0        | 53.23    | 0      | 0      | 5.761019265            | 0                |
| Mir5133       |                                                 | 0        | 44.93    | 0      | 0      | 5.521364878            | 0                |
| Snora75       |                                                 | 0        | 39.71    | 15.14  | 0      | 5.347311316            | -4.012568674     |
| Snora3        |                                                 | 0        | 35.51    | 28.45  | 53.48  | 5.190219764            | 0.887459069      |
| Snord22       |                                                 | 0        | 35.37    | 26.81  | 59.57  | 5.184677021            | 1.122999667      |
| Snora68       |                                                 | 0        | 33.21    | 37.66  | 51.34  | 5.096346199            | 0.437072287      |
| Mir675        |                                                 | 0        | 32.93    | 0      | 32.47  | 5.084489525            | 5.064796646      |
| Snora30       |                                                 | 0        | 29.96    | 0      | 0      | 4.952333566            | 0                |
| Snora7a       |                                                 | 0        | 29.45    | 0      | 0      | 4.928370323            | 0                |
| Snora44       |                                                 | 0        | 25.97    | 16.53  | 28.7   | 4.753283616            | 0.760636935      |
| H19           |                                                 | 1.26     | 41.51    | 1.04   | 68.06  | 4.233407581            | 5.081209277      |
| Ccl20         | C-C motif chemokine 20 isoform 2                | 0        | 12.8     | 18.46  | 39.31  | 3.786596362            | 1.050626073      |
| Snora24       |                                                 | 0        | 12.48    | 16.41  | 0      | 3.752748591            | -4.121844298     |
| Ugt1a10       | UDP glycosyltransferase 1 family, polypeptide   | 0.12     | 13.69    | 0      | 0      | 3.713263758            | 0                |
| Rmp           |                                                 | 0        | 11.42    | 0      | 0      | 3.634593268            | 0                |
| Insl3         | insulin-like 3 precursor                        | 0.23     | 13.65    | 0.16   | 5.31   | 3.574170444            | 2.4435152        |
| Mir678        |                                                 | 2.56     | 41.05    | 0      | 0      | 3.562156654            | 0                |
| Prr9          | proline-rich protein 9                          | 0        | 10.27    | 1.42   | 12.3   | 3.49441561             | 2.458347293      |
| Itga8         | integrin alpha-8 precursor                      | 2.28     | 34.84    | 1.03   | 9.41   | 3.449802917            | 2.358418436      |
| Hist2h2bb     | histone H2B type 2-B                            | 0        | 9.84     | 2.49   | 8.22   | 3.438292852            | 1.401539714      |
| Atp12a        | potassium-transporting ATPase alpha chain 2     | 3.34     | 45.42    | 32.8   | 60.65  | 3.418979575            | 0.867077648      |
| Gap43         | neuromodulin                                    | 0        | 9.49     | 0      | 0      | 3.390942773            | 0                |
| Kcnn3         | small conductance calcium-activated potassium   | 3.86     | 45.31    | 0.36   | 2.22   | 3.252295538            | 1.243454037      |
| Kcnp2         | Kv channel-interacting protein 2 isoform b      | 0        | 8.51     | 9.79   | 38.71  | 3.249445341            | 1.879807496      |
| Slc18a3       | vesicular acetylcholine transporter             | 2.67     | 33.85    | 0      | 3.76   | 3.247306688            | 2.250961574      |
| C2cd4b        | family with sequence similarity 148, member B   | 4.21     | 46.26    | 7.52   | 22.76  | 3.181264352            | 1.479609501      |
| Hba-a2        | hemoglobin alpha, adult chain 2                 | 1.98     | 25.27    | 2.98   | 4.62   | 3.140031965            | 0.4978017        |
| Car2          | carbonic anhydrase 2                            | 0        | 7.52     | 1.38   | 8.39   | 3.09085343             | 1.980163584      |
| Sphkap        | A-kinase anchor protein SPHKAP                  | 19.75    | 174.31   | 0.36   | 6.42   | 3.078725051            | 2.447812535      |
| Fam71a        | hypothetical protein LOC619288                  | 4.05     | 40.2     | 2.22   | 14.87  | 3.028289044            | 2.301169535      |
| Crygn         | gamma-crystallin N                              | 0        | 7.05     | 4.47   | 2.79   | 3.008988783            | -0.529342985     |
| Rpph1         |                                                 | 0        | 7        | 0      | 0      | 3                      | 0                |
| Hmga2         | high mobility group protein HMGI-C              | 2.88     | 28.84    | 0.39   | 3.66   | 2.943118978            | 1.745245072      |
| Mpp4          | MAGUK p55 subfamily member 4 isoform 1          | 0.28     | 8.41     | 0.22   | 0.26   | 2.878050913            | 0.046542586      |
| Ptgds         | prostaglandin-H2 D-isomerase                    | 1.5      | 16.67    | 9.06   | 11.58  | 2.82130204             | 0.322501617      |
| Chst9         | carbohydrate sulfotransferase 9                 | 0        | 5.56     | 0      | 0      | 2.713695815            | 0                |
| C2            | complement C2 precursor                         | 15.85    | 104.06   | 5.32   | 16.24  | 2.640392993            | 1.447763311      |
| Nts           | neurotensin/neurodynin N                        | 0        | 5.22     | 0      | 1.49   | 2.63691458             | 1.316145742      |
| Nppc          | C-type natriuretic peptide preproprotein        | 180.97   | 1130.03  | 71.35  | 315.96 | 2.635864668            | 2.131235863      |
| Pcp4          | Purkinje cell protein 4                         | 2.06     | 17.68    | 2.62   | 11.06  | 2.609890897            | 1.736168305      |
| Glr3          | glycine receptor subunit beta precursor         | 25.67    | 155.33   | 9.57   | 34.39  | 2.551304931            | 1.743366385      |
| Hbb-b2        | hemoglobin subunit beta-2                       | 1.68     | 14.68    | 8.31   | 11.46  | 2.548620654            | 0.420450995      |
| Plekha6       | pleckstrin homology domain-containing family A  | 3.08     | 22.26    | 13.46  | 20.29  | 2.51121004             | 0.558108398      |
| Sync          | syncoilin                                       | 0.9      | 9.68     | 0.71   | 1.32   | 2.490840323            | 0.44012848       |
| Sprr1b        | cornifin-B                                      | 0        | 4.45     | 2.62   | 5.74   | 2.44625623             | 0.896758894      |
| Nuf2          | kinetochore protein Nuf2                        | 2.65     | 18.77    | 35.81  | 22.58  | 2.437344502            | -0.642534031     |
| Wnt16         | protein Wnt-16 precursor                        | 2.86     | 19.78    | 18.63  | 30.86  | 2.428522902            | 0.698686094      |
| Gp1hbp1       | glycosylphosphatidylinositol-anchored high      | 0        | 4.34     | 0      | 0      | 2.416839742            | 0                |
| Klk14         | kallikrein-14 preproprotein                     | 0        | 4.3      | 0      | 0      | 2.40599236             | 0                |
| Cpa6          | carboxypeptidase A6 precursor                   | 0        | 4.26     | 0      | 3.36   | 2.3950628              | 2.124328135      |
| As3mt         | arsenite methyltransferase                      | 0.82     | 8.53     | 2.55   | 3.79   | 2.388537764            | 0.432206631      |
| Asphd2        | aspartate beta-hydroxylase domain-containing    | 0        | 4.22     | 0      | 2.13   | 2.384049807            | 1.646162657      |
| Pcdh20        | protocadherin-20 precursor                      | 20.9     | 113.02   | 7.95   | 29.84  | 2.380284132            | 1.784843178      |
| Lst1          | leukocyte-specific transcript 1 protein         | 0        | 4.19     | 0      | 0      | 2.375734539            | 0                |
| Nxf7          | nuclear RNA export factor 7 isoform 2           | 0        | 4.17     | 0.91   | 13.78  | 2.370164281            | 2.952001726      |
| 1700125H03Rik |                                                 | 0        | 4.16     | 5.12   | 12.61  | 2.367371066            | 1.153063509      |
| Tas1r2        | taste receptor type 1 member 2 precursor        | 0        | 4.13     | 0      | 0      | 2.358958826            | 0                |
| Serp1nb6e     | serine (or cysteine) peptidase inhibitor, clade | 4.01     | 24.57    | 3.66   | 19.05  | 2.351569652            | 2.105200377      |
| Birc5         | baculoviral IAP repeat-containing protein 5     | 5.78     | 33.07    | 69.33  | 46.56  | 2.329144769            | -0.564391502     |
| Ifftm5        | interferon-induced transmembrane protein 5      | 0        | 4.02     | 3.71   | 0      | 2.327687364            | -2.23572706      |
| Fhod3         | FH1/FH2 domain-containing protein 3             | 1.23     | 10.09    | 7.66   | 30.59  | 2.31414375             | 1.867029007      |
| Hmnr          | hyaluronan mediated motility receptor           | 2.32     | 15.29    | 33.6   | 20.41  | 2.294731457            | -0.692487242     |
| Kcnq3         | potassium voltage-gated channel subfamily KQT   | 0.77     | 7.67     | 0      | 0      | 2.292282633            | 0                |
| Ccnb2         | G2/mitotic-specific cyclin-B2                   | 4.59     | 26.36    | 57.53  | 41.29  | 2.291148042            | -0.468859718     |
| Kirrel3       | kin of IRRE-like protein 3 isoform D precursor  | 0        | 3.88     | 3.15   | 2.98   | 2.286881148            | -0.060342906     |
| Cdk1          | cyclin-dependent kinase 1                       | 6.08     | 33.47    | 69.51  | 42.86  | 2.283520033            | -0.684922069     |
| Shcbp1        | SHC SH2 domain-binding protein 1                | 1.65     | 11.9     | 36.07  | 19.55  | 2.283306801            | -0.851113721     |
| Ntm           | neurotrophin precursor                          | 2.7      | 16.57    | 0      | 0      | 2.247517015            | 0                |
| Ephb1         | ephrin type-B receptor 1 isoform 1              | 4.53     | 25.25    | 3.38   | 4.72   | 2.246966037            | 0.385084277      |
| Icam2         | intercellular adhesion molecule 2 precursor     | 0        | 3.73     | 0      | 1.9    | 2.241840184            | 1.5360529        |
| Pthlh         | parathyroid hormone-related protein             | 74.71    | 355.93   | 679.17 | 418.8  | 2.237085392            | -0.696193208     |
| Kird1         | natural killer cells antigen CD94               | 0        | 3.71     | 0      | 0      | 2.23572706             | 0                |
| Nlgn1         | neuroligin-1 isoform 2                          | 2.25     | 14.28    | 0.82   | 2.33   | 2.23313292             | 0.871583727      |
| Anxa9         | annexin A9                                      | 5.33     | 28.6     | 23.26  | 12.86  | 2.225319771            | -0.807652293     |
| Iqgap3        | IQ motif containing GTPase activating protein 3 | 2.97     | 17.56    | 36.56  | 20.87  | 2.224985798            | -0.780243843     |
| Mki67         | antigen KI-67                                   | 8.13     | 41.51    | 114.46 | 72.14  | 2.219115494            | -0.658660599     |
| Tpx2          | TPX2, microtubule-associated protein homolog    | 3.69     | 20.6     | 42.7   | 29.93  | 2.203371485            | -0.498626446     |
| Pdgfr         | platelet-derived growth factor C                | 18.44    | 88.47    | 29.41  | 49.65  | 2.202375797            | 0.736016453      |
| Fmod          | fibromodulin precursor                          | 43.76    | 204.85   | 5      | 26.21  | 2.201311507            | 2.181102551      |
| C1qtnf5       | complement C1q tumor necrosis factor-related    | 0.17     | 4.37     | 0.02   | 0.03   | 2.198413558            | 0.014075185      |











|               |                                                 |        |         |        |        |             |              |
|---------------|-------------------------------------------------|--------|---------|--------|--------|-------------|--------------|
| Irf2          | interferon-induced protein with                 | 2.01   | 5.23    | 1.73   | 2.37   | 1.049468676 | 0.30384764   |
| A3galt2       | alpha-1,3-galactosyltransferase 2 precursor     | 2.16   | 5.54    | 1.75   | 2.72   | 1.049366077 | 0.435871003  |
| Pif1          | ATP-dependent DNA helicase PIF1                 | 0.59   | 2.29    | 5.99   | 4.27   | 1.049060818 | -0.407489494 |
| Chk1          | serine/threonine-protein kinase Chk1            | 3.56   | 8.43    | 20.24  | 14.81  | 1.048223947 | -0.425946398 |
| 9530077C05Rik | hypothetical protein LOC68283                   | 4.51   | 10.39   | 1.64   | 3.43   | 1.047643523 | 0.746768769  |
| Trps1         | zinc finger transcription factor Trps1          | 34.69  | 72.75   | 26.57  | 58.28  | 1.047123148 | 1.10444618   |
| Slc16a4       | monocarboxylate transporter 5                   | 1.01   | 3.15    | 2.11   | 2.95   | 1.045915835 | 0.344938073  |
| Gm129         | hypothetical protein LOC229599                  | 1.03   | 3.19    | 2.48   | 3.05   | 1.045470517 | 0.218834602  |
| Adams1        | A disintegrin and metalloproteinase with        | 211.81 | 437.88  | 702.48 | 734.9  | 1.044260582 | 0.065000327  |
| Pdgfd         | platelet-derived growth factor D                | 3.82   | 8.94    | 0      | 1.01   | 1.044212705 | 1.007195501  |
| Gas5          |                                                 | 115.77 | 239.71  | 178.96 | 284.23 | 1.043626407 | 0.664449458  |
| Apln          | apelin precursor                                | 3.11   | 7.47    | 17.79  | 17.38  | 1.043223576 | -0.0318283   |
| 2510049J12Rik | hypothetical protein LOC70291                   | 0      | 1.06    | 0.82   | 0.58   | 1.042644337 | -0.204013892 |
| Galnt12       | polypeptide N-acetylgalactosaminyltransferase   | 0      | 1.06    | 0      | 0      | 1.042644337 | 0            |
| Hsd17b13      | 17-beta-hydroxysteroid dehydrogenase 13 isoform | 0      | 1.06    | 61.86  | 21.22  | 1.042644337 | -1.500283455 |
| Tagln         | transgelin                                      | 24.79  | 52.12   | 18.77  | 63.36  | 1.042443374 | 1.702851455  |
| Tmem117       | transmembrane protein 117                       | 1.19   | 3.51    | 0      | 0.85   | 1.042196564 | 0.887525271  |
| Gm13177       | arylacetamide deacetylase-like 4                | 8.37   | 18.29   | 6.92   | 8.68   | 1.04173219  | 0.289506617  |
| Incenp        | inner centromere protein                        | 15.2   | 32.35   | 54.19  | 40.62  | 1.041692948 | -0.40712992  |
| Rasa4         | ras GTPase-activating protein 4 isoform 1       | 2.61   | 6.43    | 1.73   | 2.93   | 1.041363374 | 0.525628361  |
| Grp1          | glycine/arginine-rich protein 1                 | 2.99   | 7.2     | 2.92   | 2.26   | 1.039235163 | -0.26598169  |
| Bcl3          | B-cell lymphoma 3 protein homolog               | 7.72   | 16.92   | 25.08  | 38.41  | 1.039170597 | 0.59561788   |
| Hbb-b1        | hemoglobin subunit beta-1                       | 11.9   | 25.49   | 4.33   | 6.51   | 1.038076778 | 0.494677375  |
| Cd44          | CD44 antigen isoform f precursor                | 410.92 | 844.48  | 666.41 | 873.38 | 1.037406453 | 0.389687099  |
| Snora28       |                                                 | 81.89  | 169.13  | 83.39  | 112.85 | 1.037367594 | 0.431990333  |
| Degs2         | sphingolipid delta(4)-desaturase/C4-hydroxylase | 1.88   | 4.91    | 7.4    | 6.09   | 1.037089319 | -0.2446037   |
| Procr         | endothelial protein C receptor                  | 9.55   | 20.64   | 6.2    | 17.05  | 1.0364575   | 1.325930025  |
| Sema3b        | semaphorin-3B                                   | 9.5    | 20.53   | 2.08   | 7.26   | 1.035958992 | 1.423211431  |
| Gimap1        | GTPase IMAP family member 1                     | 0      | 1.05    | 0      | 0      | 1.03562391  | 0            |
| ORF63         | TAK1-like protein                               | 0      | 1.05    | 0      | 0      | 1.03562391  | 0            |
| Slc5a3        | sodium/myo-inositol cotransporter               | 9.48   | 20.47   | 12.79  | 19.49  | 1.034683474 | 0.571297527  |
| Igfbp7        | insulin-like growth factor-binding protein 7    | 913.81 | 1871.86 | 139.17 | 255.99 | 1.033699018 | 0.874534614  |
| Ogn           | mimectan precursor                              | 9.49   | 20.43   | 3.15   | 5.63   | 1.030617172 | 0.675897534  |
| Cd72          | B-cell differentiation antigen CD72 isoform 4   | 16.28  | 34.26   | 22.16  | 3.44   | 1.028929257 | -2.383003672 |
| Fgf17         | fibroblast growth factor 17 precursor           | 0      | 1.04    | 0      | 0      | 1.028569152 | 0            |
| Hes1          | transcription factor HES-1                      | 125.53 | 257.06  | 209.55 | 215.84 | 1.028227052 | 0.042468037  |
| Ager          | advanced glycosylation end product-specific     | 1.28   | 3.65    | 0.83   | 2.94   | 1.028196892 | 1.106351981  |
| Kcnk10        | potassium channel subfamily K member 10         | 18.68  | 39.12   | 1.4    | 2.06   | 1.027591385 | 0.350497247  |
| Car3          | carbonic anhydrase 3                            | 0      | 1.03    | 0      | 0      | 1.021479727 | 0            |
| Foxj1         | forkhead box protein J1                         | 0      | 1.03    | 0      | 1.1    | 1.021479727 | 1.070389328  |
| Gm5151        | hypothetical protein LOC381582                  | 0      | 1.03    | 0      | 0      | 1.021479727 | 0            |
| Cd3g          | T-cell surface glycoprotein CD3 gamma chain     | 9.45   | 20.2    | 7.85   | 5.37   | 1.020561322 | -0.474384083 |
| Dusp10        | dual specificity protein phosphatase 10         | 19.85  | 41.29   | 50.91  | 59.11  | 1.020269177 | 0.211592532  |
| Mybl2         | myb-related protein B                           | 1.54   | 4.15    | 8.29   | 6.49   | 1.019743935 | -0.310712878 |
| Dbf4          | protein DBF4 homolog A isoform 1                | 6.51   | 14.2    | 29.3   | 23.71  | 1.017186511 | -0.294222783 |
| Gm4925        | ribosomal protein S12-like                      | 0      | 1.02    | 0      | 0      | 1.014355293 | 0            |
| Pvr           | poliovirus receptor                             | 37.91  | 77.56   | 16.28  | 29.17  | 1.013653949 | 0.804011479  |
| Cit           | citron Rho-interacting kinase                   | 0.61   | 2.25    | 5.68   | 3.97   | 1.01337903  | -0.426602251 |
| Kif26b        | kinesin-like protein KIF26B                     | 1.7    | 4.45    | 7.48   | 22.95  | 1.013296823 | 1.497889486  |
| Armc2         | armadillo repeat-containing protein 2           | 1.52   | 4.08    | 0.89   | 1.16   | 1.011404763 | 0.192645078  |
| Slf8          | schlafen 8 isoform 2                            | 1.92   | 4.88    | 2.27   | 3.02   | 1.009847786 | 0.297904866  |
| Mir24-2       |                                                 | 161.61 | 326.39  | 108.93 | 154.05 | 1.009594275 | 0.496148373  |
| EdnrB         | endothelin B receptor isoform 1                 | 1.61   | 4.25    | 1.85   | 2.56   | 1.008267616 | 0.320915322  |
| 4933432I09Rik |                                                 | 0      | 1.01    | 0      | 0      | 1.007195501 | 0            |
| Ppm1n         | probable protein phosphatase 1N                 | 0      | 1.01    | 0      | 0      | 1.007195501 | 0            |
| Soat2         | sterol O-acyltransferase 2                      | 0      | 1.01    | 0      | 0      | 1.007195501 | 0            |
| Arl5c         | ADP-ribosylation factor-like protein 5C         | 2.93   | 6.89    | 1.57   | 1.26   | 1.005495988 | -0.185445587 |
| Cd97          | CD97 antigen isoform 4                          | 15.09  | 31.29   | 46.99  | 35.57  | 1.004923115 | -0.392073186 |
| Lrrk2         | leucine-rich repeat serine/threonine-protein    | 2.75   | 6.52    | 2.92   | 6.61   | 1.003842066 | 0.957042799  |
| Gm11428       | activated macrophage/microglia WAP domain       | 3.22   | 7.46    | 0      | 0      | 1.003414664 | 0            |
| Kcnj13        | inward rectifier potassium channel 13           | 2.08   | 5.17    | 3.21   | 3.07   | 1.002340138 | -0.048791439 |
| Robo4         | roundabout homolog 4                            | 0.81   | 2.62    | 0.61   | 0.62   | 1           | 0.008933125  |
| Tgtp1         | T-cell specific GTPase                          | 0.6    | 2.2     | 1.2    | 0.75   | 1           | -0.330148602 |
| BB283400      |                                                 | 0      | 1       | 0      | 0      | 1           | 0            |



| HG Up         |                                                  |          |          |       |        |                        |                  |
|---------------|--------------------------------------------------|----------|----------|-------|--------|------------------------|------------------|
| GENE          | Description                                      | WT Bulge | KO Bulge | WT HG | KO HG  | Log2 KO Bulge/WT Bulge | Log2 KO HG/WT HG |
| Snord69       |                                                  | 0        | 0        | 0     | 232.99 | 0                      | 7.870303065      |
| Snord47       |                                                  | 0        | 98.06    | 0     | 184.98 | 6.630230716            | 7.539003674      |
| Mir3109       |                                                  | 0        | 0        | 0     | 83.95  | 0                      | 6.408542042      |
| Mir705        |                                                  | 69       | 71.9     | 0     | 81.65  | 0.058563892            | 6.368942914      |
| Mir5114       |                                                  | 70.08    | 0        | 0     | 79.43  | -6.151371776           | 6.329661815      |
| Mir5121       |                                                  | 0        | 0        | 0     | 78.95  | 0                      | 6.321026129      |
| Slc15a2       | solute carrier family 15 member 2 isoform 2      | 0        | 53.71    | 0     | 65.66  | 5.773732651            | 6.058749412      |
| Snord16a      |                                                  | 0        | 0        | 0     | 63.42  | 0                      | 6.009436756      |
| Mirlet7d      |                                                  | 31.52    | 34.93    | 0     | 39.43  | 0.143861678            | 5.337354298      |
| H19           |                                                  | 1.26     | 41.51    | 1.04  | 68.06  | 4.233407581            | 5.081209277      |
| Mir675        |                                                  | 0        | 32.93    | 0     | 32.47  | 5.084489525            | 5.064796646      |
| Snord89       |                                                  | 0        | 0        | 0     | 30.79  | 0                      | 4.990501111      |
| Mir5122       |                                                  | 34.36    | 0        | 0     | 28.32  | -5.14404637            | 4.873813198      |
| Amtn          | amelotin precursor                               | 0        | 2.79     | 0     | 24.97  | 1.922197848            | 4.698774109      |
| Scrg1         | scrapie-responsive protein 1 precursor           | 103.44   | 363.68   | 2.13  | 50.76  | 1.803956718            | 4.047603055      |
| Snora43       |                                                  | 0        | 0        | 0     | 15.33  | 0                      | 4.029452886      |
| Bex1          | protein BEX1                                     | 1.54     | 2.97     | 4.83  | 77.62  | 0.64431051             | 3.753328575      |
| Krtap8-1      | keratin-associated protein 8-1                   | 0        | 0        | 0     | 10.32  | 0                      | 3.500802053      |
| C1s           | complement C1s-A subcomponent                    | 106.07   | 402.95   | 9.14  | 84.23  | 1.915622423            | 3.07130368       |
| Nxf7          | nuclear RNA export factor 7 isoform 2            | 0        | 4.17     | 0.91  | 13.78  | 2.370164281            | 2.952001726      |
| Thpo          | thrombopoietin precursor                         | 0        | 1.09     | 0.45  | 9.61   | 1.063502942            | 2.871299851      |
| Mlana         | melanoma antigen recognized by T-cells 1         | 0        | 3.53     | 0     | 6      | 2.17951105             | 2.807354922      |
| Krt73         | keratin, type II cytoskeletal 73                 | 2.32     | 1.08     | 0.79  | 11.44  | -0.674599713           | 2.796954993      |
| Lox12         | lysyl oxidase homolog 2 precursor                | 9.21     | 42.79    | 2.27  | 21.7   | 2.100618584            | 2.795329757      |
| 1700084E18Rik |                                                  | 0        | 0        | 0     | 5.67   | 0                      | 2.737686761      |
| Lrrc4         | leucine-rich repeat-containing protein 4         | 39.86    | 76.33    | 7.89  | 57.39  | 0.920339009            | 2.715465987      |
| Krt85         | keratin, type II cuticular Hb5                   | 0        | 1.26     | 0     | 5.52   | 1.176322773            | 2.704871964      |
| AB30018L16Rik | hypothetical protein LOC320492 isoform 1         | 0.22     | 0.9      | 0.71  | 9.95   | 0.639118271            | 2.67886264       |
| Krtap7-1      | keratin-associated protein 7-1                   | 0        | 0        | 0     | 5.29   | 0                      | 2.653060017      |
| Sstr2         | somatostatin receptor type 2 isoform A           | 0        | 0        | 0     | 5.17   | 0                      | 2.625270489      |
| Col12a1       | collagen alpha-1(XII) chain                      | 111.27   | 279.2    | 8.04  | 54.72  | 1.319484483            | 2.62380058       |
| Krtap11-1     | keratin associated protein 11-1                  | 0        | 0        | 0     | 5.14   | 0                      | 2.618238656      |
| Ccnb1ip1      | E3 ubiquitin-protein ligase CCNB1IP1             | 0        | 2.18     | 0     | 5.1    | 1.669026766            | 2.608809243      |
| Cyp2g1        | cytochrome P450, family 2, subfamily g,          | 38.18    | 83       | 30.35 | 187.36 | 1.10027193             | 2.58695528       |
| Gm1673        | neuropeptide-like protein C4orf48 homolog        | 0        | 0        | 0     | 4.86   | 0                      | 2.550900665      |
| Fmo2          | dimethylalanine monooxygenase [N-oxide-forming]  | 2.01     | 2.04     | 5.61  | 37.63  | 0.014307837            | 2.546999501      |
| S100a9        | protein S100-A9                                  | 0        | 2.74     | 0     | 4.59   | 1.90303827             | 2.482848283      |
| Pamr1         | inactive serine protease PAMR1 precursor         | 2.83     | 4.4      | 1.14  | 10.86  | 0.495615015            | 2.470421308      |
| Prr9          | proline-rich protein 9                           | 0        | 10.27    | 1.42  | 12.3   | 3.49441561             | 2.458347293      |
| Sphkap        | A-kinase anchor protein SPHKAP                   | 19.75    | 174.31   | 0.36  | 6.42   | 3.078725051            | 2.447812535      |
| Insl3         | insulin-like 3 precursor                         | 0.23     | 13.65    | 0.16  | 5.31   | 3.574170444            | 2.4435152        |
| Ilnk          | interferon kappa precursor                       | 0        | 0        | 0     | 4.43   | 0                      | 2.440952198      |
| Rrad          | GTP-binding protein RAD                          | 4.75     | 12.32    | 5.73  | 35.39  | 1.211960221            | 2.434863641      |
| Iyd           | iodotyrosine dehalogenase 1 precursor            | 1.02     | 4.94     | 0     | 4.22   | 1.556107638            | 2.384049807      |
| Tmem178       | transmembrane protein 178 precursor              | 0        | 0        | 0     | 4.15   | 0                      | 2.364572432      |
| Nr1h5         | nuclear receptor subfamily 1, group H, member 5  | 0        | 1.2      | 0     | 4.13   | 1.137503524            | 2.358958826      |
| Itga8         | integrin alpha-8 precursor                       | 2.28     | 34.84    | 1.03  | 9.41   | 3.449802917            | 2.358418436      |
| Mkx           | homeobox protein Mohawk                          | 11.15    | 18.13    | 2.18  | 15.01  | 0.65488056             | 2.331874637      |
| Fam71a        | hypothetical protein LOC619288                   | 4.05     | 40.2     | 2.22  | 14.87  | 3.028289044            | 2.301169535      |
| Tnc           | tenascin                                         | 487.81   | 801.82   | 48.02 | 238.72 | 0.715802758            | 2.28990789       |
| Fxyd4         | FXYD domain-containing ion transport regulator 4 | 0        | 3.15     | 0     | 3.89   | 2.053111336            | 2.289834465      |
| AW112010      | hypothetical protein LOC107350                   | 4.49     | 8.82     | 0     | 3.88   | 0.838916875            | 2.268881148      |
| Ugt1a9        | UDP-glucuronosyltransferase 1-9 precursor        | 0.03     | 0        | 2.59  | 16.4   | -0.042644337           | 2.277031557      |
| Relt          | tumor necrosis factor receptor superfamily       | 0.66     | 1.36     | 0.81  | 7.71   | 0.507603618            | 2.266683022      |
| Prtm3         | myeloblastin precursor                           | 2.96     | 3.61     | 0     | 3.81   | 0.21926632             | 2.266036894      |
| Slc18a3       | vesicular acetylcholine transporter              | 2.67     | 33.85    | 0     | 3.76   | 3.247306688            | 2.250961574      |
| Aim           |                                                  | 17.56    | 57.51    | 3.71  | 21.18  | 1.656486508            | 2.235460401      |
| Dbn1          | drebrin isoform 2                                | 37.14    | 50.23    | 12    | 60.17  | 0.425684048            | 2.234312653      |
| Stfa1         | stefin-1                                         | 1.72     | 0        | 0     | 3.69   | -1.443606651           | 2.229587923      |
| Xlr3b         | X-linked lymphocyte-regulated protein 3B         | 1.07     | 6.54     | 0.53  | 6.05   | 1.864933756            | 2.204091605      |
| Pisd-ps1      |                                                  | 82.57    | 182.47   | 13.64 | 66.33  | 1.13448714             | 2.201333911      |
| Synpo2        | synaptopodin-2                                   | 16.25    | 51.41    | 25.2  | 119.15 | 1.603245747            | 2.197197932      |
| Fgf21         | fibroblast growth factor 21 precursor            | 0        | 2.87     | 0     | 3.58   | 1.952333566            | 2.195347598      |
| Gm5077        | complement C1s-B subcomponent precursor          | 21.24    | 65.43    | 2.53  | 15.12  | 1.578678126            | 2.191111655      |
| Fmod          | fibromodulin precursor                           | 43.76    | 204.85   | 5     | 26.21  | 2.201311507            | 2.181102551      |
| Mcoln3        | muclolin-3                                       | 3.07     | 5.88     | 2.11  | 12.78  | 0.75737977             | 2.147589403      |
| Gm1045        | hypothetical protein LOC381651 precursor         | 11.63    | 17.21    | 4.14  | 21.76  | 0.527876283            | 2.146660293      |
| Nppc          | C-type natriuretic peptide preproprotein         | 180.97   | 1130.03  | 71.35 | 315.96 | 2.635864668            | 2.131235863      |
| Cpa6          | carboxypeptidase A6 precursor                    | 0        | 4.26     | 0     | 3.36   | 2.3950628              | 2.124328135      |
| Itga1         | integrin alpha-1 precursor                       | 9.54     | 40.69    | 4.71  | 23.77  | 1.983826505            | 2.117031218      |
| Col14a1       | collagen alpha-1(XIV) chain                      | 3.38     | 4.12     | 6.78  | 32.62  | 0.22521294             | 2.11477664       |
| Fam198b       | protein ENED                                     | 18.59    | 34.68    | 4.53  | 22.84  | 0.864998218            | 2.10803285       |
| Serpnb6e      | serine (or cysteine) peptidase inhibitor, clade  | 4.01     | 24.57    | 3.66  | 19.05  | 2.351569652            | 2.105200377      |
| Fam70a        | family with sequence similarity 70, member A     | 5.08     | 13.08    | 2.34  | 13.32  | 1.211504105            | 2.100111485      |
| Prex2         | phosphatidylinositol                             | 1.87     | 6.56     | 1.49  | 9.61   | 1.397335498            | 2.091207009      |
| Cpt1b         | carnitine O-palmitoyltransferase 1, muscle       | 0        | 0        | 0     | 3.25   | 0                      | 2.087462841      |
| Tmem95        | transmembrane protein 95                         | 0        | 3.11     | 0     | 3.25   | 2.039138394            | 2.087462841      |
| Ncam1         | neural cell adhesion molecule 1 isoform 2        | 1.22     | 4.79     | 2.48  | 13.66  | 1.383003672            | 2.074725892      |
| 1700086O06Rik |                                                  | 10.52    | 34.08    | 6.46  | 30.39  | 1.606508031            | 2.073057493      |
| Gm14403       |                                                  | 8.52     | 28.07    | 4.6   | 22.21  | 1.610497593            | 2.05124779       |
| 2810429I04Rik |                                                  | 0        | 0        | 0     | 3.11   | 0                      | 2.039138394      |
| Krtap17-1     | keratin-associated protein 17-1                  | 245.56   | 365.04   | 37.99 | 158.56 | 0.570062545            | 2.032922969      |
| Islr          | immunoglobulin superfamily containing            | 2.82     | 4.26     | 0     | 2.97   | 0.461490161            | 1.989139007      |
| Zfp618        | zinc finger protein 618                          | 0        | 1.75     | 0     | 2.97   | 1.459431619            | 1.989139007      |
| Car2          | carbonic anhydrase 2                             | 0        | 7.52     | 1.38  | 8.39   | 3.09085343             | 1.980163584      |
| 5430421N21Rik | type II hair keratin                             | 0.53     | 0        | 0     | 2.9    | -0.613531653           | 1.963474124      |
| Cmah          | cytidine monophosphate-N-acetylneuraminic acid   | 1.47     | 3.29     | 1     | 6.77   | 0.796466606            | 1.957914599      |



|               |                                                  |        |         |        |        |              |             |
|---------------|--------------------------------------------------|--------|---------|--------|--------|--------------|-------------|
| 3110021A11Rik |                                                  | 1.89   | 1.96    | 0      | 1.89   | 0.034527683  | 1.531069493 |
| Ii24          | interleukin-24                                   | 0      | 0       | 0      | 1.89   | 0            | 1.531069493 |
| Slc10a1       | sodium/bile acid cotransporter isoform 2         | 1.48   | 3.28    | 0      | 1.89   | 0.787270676  | 1.531069493 |
| Bgn           | biglycan precursor                               | 175.19 | 499.83  | 87.56  | 254.79 | 1.507188939  | 1.530232737 |
| Hist1h3d      | histone H3.2                                     | 0      | 0.36    | 0.16   | 2.35   | 0.443606651  | 1.53003629  |
| Kif26a        | kinesin-like protein KIF26A                      | 4.29   | 3.58    | 0.99   | 4.71   | -1.207920124 | 1.520272315 |
| Pmel          | melanocyte protein PMEL precursor                | 11.29  | 31.31   | 14.02  | 41.97  | 1.394495835  | 1.516444964 |
| Serpine1      | plasminogen activator inhibitor 1 precursor      | 23.77  | 46.93   | 74.12  | 212.86 | 0.952335071  | 1.5093977   |
| Fndc1         | fibronectin type III domain-containing protein   | 8.64   | 5.15    | 1.73   | 6.77   | -0.648446736 | 1.509013647 |
| Stk32c        | serine/threonine-protein kinase 32C isoform 2    | 2.04   | 1.84    | 0      | 1.84   | -0.098180394 | 1.50589093  |
| MyI9          | myosin regulatory light polypeptide 9            | 193.68 | 385.51  | 52.62  | 151.07 | 0.989401061  | 1.503892445 |
| Gm6498        |                                                  | 2.19   | 2.39    | 0      | 1.83   | 0.087728849  | 1.500802053 |
| Icam4         | intercellular adhesion molecule 4 precursor      | 2.64   | 2.04    | 0      | 1.83   | -0.259867127 | 1.500802053 |
| Kif26b        | kinesin-like protein KIF26B                      | 1.7    | 4.45    | 7.48   | 22.95  | 1.013296823  | 1.497889486 |
| 1500015A07Rik |                                                  | 7.16   | 36.08   | 13.82  | 40.7   | 2.184000187  | 1.492501936 |
| Wdr86         | WD repeat domain 86                              | 0      | 1.11    | 0      | 1.81   | 1.077242999  | 1.49057013  |
| Gm438         | hypothetical protein LOC329993                   | 0      | 1.34    | 0      | 1.8    | 1.22650853   | 1.485426827 |
| Plcl1         | inactive phospholipase C-like protein 1          | 29.42  | 52      | 3.92   | 12.76  | 0.800972207  | 1.483750249 |
| Cd3d          | T-cell surface glycoprotein CD3 delta chain      | 1.45   | 2.34    | 0      | 1.79   | 0.447066353  | 1.480265122 |
| C2cd4b        | family with sequence similarity 148, member B    | 4.21   | 46.26   | 7.52   | 22.76  | 3.181264352  | 1.479609501 |
| Tnfrsf11b     | tumor necrosis factor receptor superfamily       | 183.14 | 359.85  | 74.77  | 210.09 | 0.970562003  | 1.478159582 |
| Creb5         | cyclic AMP-responsive element-binding protein 5  | 100.41 | 215.57  | 34.01  | 96.51  | 1.094633487  | 1.477783118 |
| Krt33a        | keratin, type I cuticular Ha3-I                  | 0.52   | 0       | 1.16   | 5.01   | -0.604071324 | 1.476333679 |
| A630001G21Rik | hypothetical protein LOC319997                   | 0      | 1.14    | 1.16   | 5      | 1.097610797  | 1.473931188 |
| Shisa4        | protein shisa-4 precursor                        | 2.45   | 3.73    | 0      | 1.77   | 0.455243822  | 1.469885976 |
| Whrn          | whirlin isoform 6                                | 20.33  | 44.98   | 8.91   | 26.25  | 1.1081225    | 1.459299267 |
| Gli2          | zinc finger protein GLI2                         | 90.87  | 98.42   | 41.62  | 115.91 | 0.113942275  | 1.45795839  |
| Klhl34        | kelch-like protein 34                            | 1.08   | 4.75    | 0      | 1.74   | 1.466978428  | 1.454175893 |
| Nppa          | atrial natriuretic factor                        | 1.73   | 0       | 0      | 1.73   | -1.448900951 | 1.448900951 |
| C2            | complement C2 precursor                          | 15.85  | 104.06  | 5.32   | 16.24  | 2.640392993  | 1.447763311 |
| Prdm5         | PR domain zinc finger protein 5                  | 8.55   | 9.13    | 4.33   | 13.51  | 0.085061536  | 1.444840081 |
| Ct2f          | cardiotrophin-2 precursor                        | 0      | 0       | 0      | 1.71   | 0            | 1.438292852 |
| 9430076C15Rik |                                                  | 3.77   | 16.76   | 1.69   | 6.28   | 1.89657041   | 1.436332278 |
| 2610203C20Rik |                                                  | 13.77  | 31.63   | 10.73  | 30.67  | 1.143529161  | 1.432913854 |
| Samd12        | sterile alpha motif domain-containing protein    | 50.34  | 32.52   | 13.62  | 38.46  | -0.615061147 | 1.432447645 |
| Robo1         | roundabout homolog 1 precursor                   | 5.52   | 8.05    | 16.53  | 46.13  | 0.473045828  | 1.426819685 |
| Efnb3         | ephrin-B3 precursor                              | 6.2    | 7.37    | 4.41   | 13.54  | 0.217230716  | 1.42632677  |
| Sema3b        | semaphorin-3B                                    | 9.5    | 20.53   | 2.08   | 7.26   | 1.035958992  | 1.423211431 |
| Gm8773        |                                                  | 1.12   | 1.49    | 0      | 1.66   | 0.232081478  | 1.411426246 |
| Cps1          | carbamoyl-phosphate synthase [ammonia]           | 0      | 0.8     | 0.24   | 2.29   | 0.847996907  | 1.407747463 |
| Gpnm6         | transmembrane glycoprotein NMB precursor         | 55.7   | 243.45  | 16.13  | 44.41  | 2.108118765  | 1.406484885 |
| Tex19.2       | testis-expressed protein 19.2                    | 0.94   | 1.16    | 0      | 1.65   | 0.15497466   | 1.40599236  |
| Hist2h2bb     | histone H2B type 2-B                             | 0      | 9.84    | 2.49   | 8.22   | 3.438292852  | 1.401539714 |
| Phyh1d        | phytanoyl-CoA dioxygenase domain-containing      | 7.53   | 13.48   | 3.46   | 10.77  | 0.763443956  | 1.399989705 |
| Etfmp2        | EGF-containing fibulin-like extracellular matrix | 71.92  | 89.22   | 13.11  | 36.23  | 0.307132725  | 1.399747628 |
| Grb10         | growth factor receptor-bound protein 10 isoform  | 6.3    | 9.53    | 2.67   | 8.67   | 0.528537067  | 1.397735827 |
| Susd3         | sushi domain-containing protein 3                | 2.05   | 1.66    | 0      | 1.63   | -0.197382997 | 1.3950628   |
| Upk1b         | uroplakin-1b                                     | 0      | 0       | 0      | 1.62   | 0            | 1.389566812 |
| Kif21b        | kinesin-like protein KIF21B                      | 38.35  | 27.06   | 6.26   | 18     | -0.487848627 | 1.387957965 |
| Nkd1          | protein naked cuticle homolog 1 isoform 1        | 41.66  | 14.66   | 10.61  | 29.32  | -1.445799753 | 1.384901781 |
| 1700028P14Rik | hypothetical protein LOC67483                    | 0      | 0       | 0      | 1.61   | 0            | 1.384049807 |
| Thy1          | thy-1 membrane glycoprotein preproprotein        | 84.33  | 301.04  | 27.86  | 74.08  | 1.823614669  | 1.37935735  |
| Odz3          | teneurin-3 isoform 1                             | 23.88  | 39.14   | 6.51   | 18.53  | 0.690054131  | 1.378807136 |
| Adamts1       | ADAMTS-like protein 1                            | 1.22   | 9.17    | 3.42   | 10.49  | 2.195688098  | 1.378260523 |
| Fbn2          | fibillin-2 precursor                             | 1.21   | 3.73    | 2.82   | 8.93   | 1.097793814  | 1.378221079 |
| Pdlim7        | PDZ and LIM domain protein 7 isoform a           | 95.36  | 97.04   | 39.09  | 103.21 | 0.024936091  | 1.378179403 |
| Kirrel        | kin of IRRE-like protein 1 precursor             | 79.09  | 105.38  | 34.92  | 92.33  | 0.409532917  | 1.377553546 |
| C2cd4a        | family with sequence similarity 148, member A    | 4.95   | 9.11    | 2.65   | 8.48   | 0.764821424  | 1.376990595 |
| Gm106         | RPE-spondin precursor                            | 6.2    | 20.86   | 4.22   | 12.55  | 1.602224589  | 1.37617114  |
| Ramp1         | receptor activity-modifying protein 1 isoform 3  | 133.79 | 153.81  | 36.26  | 95.6   | 0.199785198  | 1.374395515 |
| Rab6b         | ras-related protein Rab-6B                       | 56.11  | 73.85   | 17.88  | 47.87  | 0.390258932  | 1.37209034  |
| Mfap2         | microfibrillar-associated protein 2              | 46.63  | 77.49   | 81.44  | 212.14 | 0.720638311  | 1.370384959 |
| Gpr137c       | G protein-coupled receptor 137C                  | 0      | 0       | 0      | 1.58   | 0            | 1.367371066 |
| Pkd1l3        | polycystic kidney disease protein 1-like 3       | 1.02   | 2.76    | 0.46   | 2.75   | 0.896377369  | 1.360922227 |
| Ldoc1         | protein LDOC1                                    | 0      | 0       | 0      | 1.56   | 0            | 1.35614381  |
| Ror2          | tyrosine-protein kinase transmembrane receptor   | 35.7   | 38.39   | 15.38  | 40.84  | 0.102049354  | 1.352947495 |
| Mme           | neprilysin                                       | 92.61  | 62.2    | 25.63  | 66.82  | -0.566738097 | 1.348658356 |
| Xkr6          | X Kell blood group precursor related family      | 1.91   | 1.57    | 0      | 1.54   | -0.179250794 | 1.344828497 |
| Dlg4          | disks large homolog 4 isoform 1                  | 34.03  | 38.64   | 7.61   | 20.83  | 0.178365974  | 1.342226988 |
| Asb16         | ankyrin repeat and SOCS box protein 16           | 0      | 0       | 0      | 1.52   | 0            | 1.333423734 |
| Trim9         | E3 ubiquitin-protein ligase TRIM9 isoform a      | 0.26   | 0.82    | 0      | 1.52   | 0.530514717  | 1.333423734 |
| Plaur         | urokinase plasminogen activator surface receptor | 8.75   | 13.42   | 4.39   | 12.53  | 0.564597041  | 1.327804661 |
| Cyp2a5        | cytochrome P450 2A5                              | 0      | 0       | 0.59   | 2.99   | 0            | 1.327361981 |
| Procr         | endothelial protein C receptor                   | 9.55   | 20.64   | 6.2    | 17.05  | 1.0364575    | 1.325930025 |
| 4930578I06Rik | hypothetical protein LOC67750                    | 0      | 0       | 0      | 1.5    | 0            | 1.321928095 |
| Haao          | 3-hydroxyanthranilate 3,4-dioxygenase            | 0      | 0       | 0      | 1.5    | 0            | 1.321928095 |
| Cnksr2        | connector enhancer of kinase suppressor of ras   | 3.05   | 12.51   | 0.45   | 2.62   | 1.738033862  | 1.319936797 |
| Prune2        | protein prune homolog 2                          | 6.94   | 8.81    | 1.65   | 5.6    | 0.305114129  | 1.316473665 |
| Shank1        | SH3 and multiple ankyrin repeat domains 1        | 19.03  | 32.99   | 7.57   | 20.34  | 0.762947941  | 1.316193067 |
| Nts           | neurotensin/neurodynin N                         | 0      | 5.22    | 0      | 1.49   | 2.63691458   | 1.316145742 |
| Ccdc60        | coiled-coil domain-containing protein 60         | 3.56   | 3.66    | 0.9    | 3.73   | 0.03129613   | 1.315840765 |
| Fhl1          | four and a half LIM domains protein 1 isoform 2  | 134.89 | 156.56  | 34.82  | 88.17  | 0.213462028  | 1.31579308  |
| Cnfr          | ciliary neurotrophic factor receptor subunit     | 7.86   | 12.27   | 43.78  | 110.4  | 0.582789767  | 1.314822799 |
| Phactr1       | phosphatase and actin regulator 1 isoform 3      | 2.75   | 3.13    | 1.81   | 5.98   | 0.139251186  | 1.312656906 |
| Wif1          | wnt inhibitory factor 1 precursor                | 136.91 | 502.54  | 154.15 | 384.03 | 1.868379315  | 1.311307162 |
| Gnt1          | beta-1,3-galactosyl-O-glycosyl-glycoprotein      | 8.26   | 6.65    | 3.44   | 9.98   | -0.275552446 | 1.306246473 |
| Pid1          | PTB-containing, cubilin and LRP1-interacting     | 30.94  | 34.98   | 3.25   | 9.51   | 0.171830874  | 1.306227923 |
| Nckap5l       | nck-associated protein 5-like                    | 5.88   | 11.88   | 8.19   | 21.7   | 0.904652123  | 1.304555531 |
| Magge2        | melanoma antigen, family E, 2                    | 1.39   | 3.32    | 0      | 1.47   | 0.854020694  | 1.304511042 |
| Zbp2          | zona pellucida-binding protein 2 isoform 1       | 2.08   | 1.24    | 0      | 1.47   | -0.459431619 | 1.304511042 |
| Sparc         | SPARC precursor                                  | 3462.6 | 1983.38 | 230.49 | 569.32 | -0.803584006 | 1.300821753 |
| Ano7          | anoctamin-7                                      | 1.32   | 1.91    | 2.97   | 8.76   | 0.326894348  | 1.29774214  |

|               |                                                  |         |         |        |         |              |             |
|---------------|--------------------------------------------------|---------|---------|--------|---------|--------------|-------------|
| Ccdc68        | coiled-coil domain-containing protein 68         | 6.94    | 9.11    | 1.69   | 5.6     | 0.348572085  | 1.294859852 |
| Acot7         | cytosolic acyl coenzyme A thioester hydrolase    | 81.58   | 97.44   | 59.66  | 147.58  | 0.253452239  | 1.292422528 |
| Heyl          | hairly/enhancer-of-split related with YRPW       | 0.61    | 0.63    | 0.62   | 2.96    | 0.017811276  | 1.289506617 |
| Kcnc4         | potassium voltage-gated channel subfamily C      | 11.82   | 16.27   | 1.77   | 5.77    | 0.429871821  | 1.289269858 |
| Gda           | guanine deaminase                                | 61.01   | 66.08   | 7.02   | 18.6    | 0.113381799  | 1.289179513 |
| Vegfc         | vascular endothelial growth factor C precursor   | 2.15    | 2.91    | 0      | 1.44    | 0.311816779  | 1.286881148 |
| Rasl11b       | ras-like protein family member 11B               | 19.23   | 10.82   | 7.37   | 19.42   | -0.775266284 | 1.286683338 |
| Acsm3         | acyl-coenzyme A synthetase ACSM3, mitochondrial  | 1.37    | 4.74    | 3.37   | 9.65    | 1.276163678  | 1.285148246 |
| Tgif2         | homeobox protein TGIF2                           | 5.84    | 20.16   | 12.98  | 32.98   | 1.629271397  | 1.281321492 |
| 1810024B03Rik | hypothetical protein LOC329509                   | 1.35    | 1.71    | 0      | 1.43    | 0.205632095  | 1.280956314 |
| Ccdc85a       | coiled-coil domain-containing protein 85A        | 5.59    | 6.96    | 0      | 1.43    | 0.272489966  | 1.280956314 |
| Dlx4          | homeobox protein DLX-4                           | 2.23    | 0.81    | 0      | 1.43    | -0.835544468 | 1.280956314 |
| Cyp21a1       | steroid 21-hydroxylase                           | 0       | 0.5     | 0.74   | 3.22    | 0.584962501  | 1.278155693 |
| Mettl7a1      | methyltransferase-like protein 7A                | 29.28   | 29.95   | 22.38  | 55.62   | 0.031574204  | 1.276036819 |
| Bdh2          | 3-hydroxybutyrate dehydrogenase type 2 isoform   | 1.75    | 3.1     | 0      | 1.42    | 0.576192291  | 1.275007047 |
| Lzts1         | leucine zipper putative tumor suppressor 1       | 1.58    | 6.48    | 4.72   | 12.83   | 1.535667204  | 1.273714104 |
| Rsp4a         | radial spoke head protein 4 homolog A            | 25.07   | 56.16   | 3.53   | 9.94    | 1.132615334  | 1.272029783 |
| Fblim1        | filamin-binding LIM protein 1                    | 16.02   | 20.48   | 5.22   | 14.02   | 0.335762956  | 1.271898327 |
| Lgals6        | galectin-6                                       | 6.57    | 9.95    | 6.73   | 17.66   | 0.532565665  | 1.271408667 |
| Slc20a1       | sodium-dependent phosphate transporter 1 isoform | 33.31   | 136.72  | 59.44  | 144.45  | 2.005037055  | 1.266947731 |
| Zc3h12c       | probable ribonuclease ZC3H12C                    | 17.71   | 32.87   | 24.8   | 61.03   | 0.856198428  | 1.265595059 |
| Ndrgr1        | protein NDRG1                                    | 560.51  | 1094.15 | 172.8  | 415.5   | 0.963744865  | 1.260888413 |
| Ggt1          | gamma-glutamyltranspeptidase 1 precursor         | 0       | 0       | 0      | 1.39    | 0            | 1.257010618 |
| Procdh9       | protocadherin beta 9                             | 2.42    | 4.69    | 0.64   | 2.91    | 0.734432327  | 1.253472793 |
| Tnni1         | troponin I, slow skeletal muscle                 | 0       | 0       | 0      | 1.38    | 0            | 1.250961574 |
| Tmem88b       | transmembrane protein 88B                        | 1.87    | 6.82    | 1.61   | 5.21    | 1.446117871  | 1.250543462 |
| Sdk1          | protein sidekick-1 precursor                     | 14.37   | 32.6    | 3.91   | 10.68   | 1.128344068  | 1.250245345 |
| Ssd3          | PH and SEC7 domain-containing protein 3 isoform  | 14.56   | 20.39   | 11.21  | 28.03   | 0.459094422  | 1.249481372 |
| Igf2          | insulin-like growth factor-binding protein 2     | 34.8    | 54.85   | 74.9   | 179.27  | 0.641597693  | 1.247987537 |
| Msi1          | RNA-binding protein Musashi homolog 1            | 1.11    | 1.59    | 3.8    | 10.39   | 0.295709099  | 1.246661436 |
| Pitpnc1       | cytoplasmic phosphatidylinositol transfer        | 4.06    | 12.87   | 3.77   | 10.31   | 1.454758498  | 1.245537758 |
| Kih135        | kelch-like protein 35                            | 1.26    | 2.43    | 0      | 1.37    | 0.601885804  | 1.244887059 |
| Mettl7a2      | methyltransferase like 7A2                       | 3.92    | 3.75    | 2.53   | 7.36    | -0.050730802 | 1.243834759 |
| Kcnn3         | small conductance calcium-activated potassium    | 3.86    | 45.31   | 0.36   | 2.22    | 3.252295538  | 1.243454037 |
| Sl3gal5       | lactosylceramide alpha-2,3-sialyltransferase     | 1.76    | 10.68   | 1.63   | 5.21    | 2.081300102  | 1.239530469 |
| Serpind1      | heparin cofactor 2 precursor                     | 0       | 0       | 0      | 1.36    | 0            | 1.23878686  |
| Gm1987        | predicted gene 1987                              | 1.97    | 3.5     | 0.77   | 3.17    | 0.59946207   | 1.236298023 |
| Hpcal4        | hippocalcin-like protein 4                       | 0       | 0.81    | 0      | 1.35    | 0.855989697  | 1.232606757 |
| Gm8898        | KRAB box and zinc finger C2H2 type domain        | 1.94    | 4.79    | 1.49   | 4.84    | 0.977747193  | 1.229822627 |
| Pcdhb11       | protocadherin beta 11                            | 2.47    | 6.27    | 1.37   | 4.55    | 1.067019701  | 1.227600712 |
| Hsd17b1       | estradiol 17-beta-dehydrogenase 1                | 0       | 0       | 0      | 1.34    | 0            | 1.22650853  |
| 2810032G03Rik |                                                  | 24.46   | 20.34   | 1.99   | 5.98    | -0.254672243 | 1.223081552 |
| Adams20       | A disintegrin and metalloproteinase with         | 0       | 2.06    | 0.23   | 1.87    | 1.613531653  | 1.22392421  |
| Bves          | blood vessel epicardial substance                | 5.42    | 16.23   | 0      | 1.33    | 1.424277499  | 1.220329955 |
| Gnao1         | guanine nucleotide-binding protein G(o) subunit  | 5.54    | 7.48    | 2.2    | 6.44    | 0.374773629  | 1.217230716 |
| Pdnp          | podoplanin precursor                             | 6.1     | 15.95   | 4.65   | 12.12   | 1.255394344  | 1.215444947 |
| Clec3b        | tetranectin precursor                            | 68.71   | 81.32   | 14.42  | 34.78   | 0.239877355  | 1.214350622 |
| Hhpl1         | HHIP-like protein 1 precursor                    | 0       | 0       | 1.44   | 4.66    | 0            | 1.213920905 |
| Anxa3         | annexin A3                                       | 2.67    | 4.22    | 1.87   | 5.63    | 0.508269744  | 1.207958133 |
| Csn3          | kappa-casein precursor                           | 0       | 0       | 0      | 1.31    | 0            | 1.207892852 |
| Amt           | aminomethyltransferase, mitochondrial precursor  | 11.52   | 14.02   | 4.24   | 11.08   | 0.262650251  | 1.204981738 |
| Sdk2          | protein sidekick-2 precursor                     | 86.59   | 47.84   | 15.83  | 37.77   | -0.842702969 | 1.203905558 |
| Dgat2l6       | diacylglycerol O-acyltransferase 2-like protein  | 1.22    | 4.12    | 0      | 1.3     | 1.205584134  | 1.201633861 |
| Tspan10       | tetraspanin-10                                   | 0       | 0       | 0      | 1.3     | 0            | 1.201633861 |
| Krt71         | keratin, type II cytoskeletal 71                 | 4.35    | 0.87    | 3.84   | 10.13   | -1.516500621 | 1.20137464  |
| Ntrk3         | NT-3 growth factor receptor isoform b            | 0.98    | 1.82    | 0      | 1.29    | 0.510194732  | 1.195347598 |
| Phxr4         |                                                  | 0       | 0       | 0      | 1.29    | 0            | 1.195347598 |
| Tbx1          | T-box transcription factor TBX1                  | 983.76  | 1359.55 | 153.15 | 350.89  | 0.466345909  | 1.190789627 |
| Hs6st2        | heparan-sulfate 6-O-sulfotransferase 2 isoform   | 1.18    | 5.73    | 4.27   | 11      | 1.62627837   | 1.187159539 |
| Ddah2         | N(G),N(G)-dimethylarginine                       | 172.7   | 148.29  | 39.25  | 90.63   | -0.218480222 | 1.186831236 |
| Krt8          | keratin, type II cytoskeletal 8                  | 6.53    | 18.61   | 8.31   | 20.19   | 1.380867766  | 1.186530515 |
| Mylk          | myosin light chain kinase, smooth muscle         | 20.72   | 47.6    | 5.27   | 13.2    | 1.161932211  | 1.179353582 |
| Mgst2         | microsomal glutathione S-transferase 2           | 14.85   | 17.19   | 50.76  | 116.11  | 0.198662703  | 1.17795475  |
| Efhc2         | EF-hand domain-containing family member C2       | 0       | 0.64    | 0      | 1.26    | 0.713695815  | 1.176322773 |
| Gm12216       |                                                  | 0       | 0       | 0      | 1.26    | 0            | 1.176322773 |
| Gprc5d        | G-protein coupled receptor family C group 5      | 0       | 0       | 0      | 1.26    | 0            | 1.176322773 |
| Pcdhb5        | protocadherin beta 5                             | 1.31    | 1.06    | 0      | 1.26    | -0.165248514 | 1.176322773 |
| Pmepa1        | transmembrane prostate androgen-induced protein  | 12.45   | 22.59   | 25.44  | 58.56   | 0.810569246  | 1.171621577 |
| Trerf1        | transcriptional-regulating factor 1 isoform 1    | 14.41   | 27.96   | 7.46   | 17.96   | 0.910194741  | 1.164229396 |
| Serpina3j     | serine (or cysteine) peptidase inhibitor, clade  | 25.58   | 26.31   | 35.57  | 80.94   | 0.039088209  | 1.163907266 |
| Hlf           | hepatic leukemia factor                          | 8.01    | 23.09   | 7.99   | 19.14   | 1.418835382  | 1.163670662 |
| AI428936      | nesprin-4                                        | 0       | 1.45    | 0      | 1.24    | 1.292781749  | 1.163498732 |
| Edn2          | endothelin-2 precursor                           | 11.99   | 43.53   | 35.72  | 81.25   | 1.777376181  | 1.16344962  |
| Usp11         | ubiquitin carboxyl-terminal hydrolase 11         | 20.05   | 34.82   | 13.48  | 31.4    | 0.766945104  | 1.161932211 |
| Per2          | period circadian protein homolog 2               | 1.73    | 4.39    | 2.68   | 7.23    | 0.981384322  | 1.161866664 |
| Gm14431       | KRAB box and zinc finger C2H2 type domain        | 2.13    | 5       | 1.66   | 4.94    | 0.938799844  | 1.159036685 |
| Gm889         | hypothetical protein LOC380755                   | 0       | 2.04    | 0      | 1.23    | 1.604071324  | 1.15704371  |
| Sh2d4b        | SH2 domain-containing protein 4B                 | 0       | 0       | 0      | 1.23    | 0            | 1.15704371  |
| Dct           | L-dopachrome tautomerase precursor               | 20.76   | 59.2    | 37.62  | 85.03   | 1.46808493   | 1.155491673 |
| Slc38a2       | sodium-coupled neutral amino acid transporter 2  | 2984.97 | 4637.41 | 781.11 | 1739.44 | 0.635430678  | 1.154008644 |
| Nupr1         | nuclear protein 1                                | 64.8    | 118.62  | 86.82  | 194.41  | 0.862299134  | 1.153882859 |
| 1700125H03Rik |                                                  | 0       | 4.16    | 5.12   | 12.61   | 2.367371066  | 1.153063509 |
| Ccno          | cyclin-O                                         | 7.99    | 15.68   | 6.7    | 16.12   | 0.891726268  | 1.152752351 |
| Lrrn2         | leucine rich repeat protein 2, neuronal          | 0.34    | 0.65    | 0      | 1.22    | 0.300233024  | 1.150559677 |
| Rarres2       | retinoic acid receptor responder protein 2       | 49.98   | 81.15   | 16     | 36.52   | 0.688329202  | 1.142125081 |
| Kih13         | kelch-like protein 13                            | 7.05    | 11.9    | 1.98   | 5.57    | 0.680310377  | 1.14058104  |
| Ccl11         | eotaxin precursor                                | 11.5    | 23.51   | 3.43   | 8.76    | 0.971442389  | 1.139574449 |
| 1700019B03Rik | hypothetical protein LOC76406                    | 0       | 0       | 0      | 1.2     | 0            | 1.137503524 |
| Ttc7b         | tetratricopeptide repeat domain 7B               | 7.21    | 12.85   | 3.91   | 9.79    | 0.754431849  | 1.135899935 |
| Mex3a         | RNA-binding protein MEX3A                        | 5.14    | 6.01    | 12.85  | 29.43   | 0.191175789  | 1.135608358 |
| Smoc1         | SPARC-related modular calcium-binding protein 1  | 52.01   | 5.41    | 25.37  | 56.85   | -3.047868279 | 1.133419388 |
| Fxyd1         | phospholemman isoform b precursor                | 12.39   | 25.64   | 7.53   | 17.71   | 0.992438122  | 1.133191912 |



|               |                                                 |         |         |        |        |              |             |
|---------------|-------------------------------------------------|---------|---------|--------|--------|--------------|-------------|
| Wnt9a         | protein Wnt-9a precursor                        | 3.63    | 6.32    | 2.08   | 5.32   | 0.660831455  | 1.036994207 |
| Basp1         | brain acid soluble protein 1                    | 12.29   | 16.11   | 40.61  | 84.37  | 0.364498655  | 1.036798891 |
| Fbln2         | fibulin-2 isoform b                             | 150.07  | 112.24  | 14.59  | 30.98  | -0.415833539 | 1.036549011 |
| Mapk15        | mitogen-activated protein kinase 15             | 4.81    | 5.94    | 2.16   | 5.48   | 0.256397499  | 1.036069255 |
| Hepacam2      | HEPACAM family member 2 precursor               | 0.81    | 0.7     | 0      | 1.05   | -0.090454951 | 1.03562391  |
| Omd           | osteomodulin precursor                          | 1.33    | 2.12    | 0      | 1.05   | 0.421216074  | 1.03562391  |
| 2210404O07Rik | transmembrane protein C19orf77 homolog          | 9.25    | 18.27   | 7.62   | 16.67  | 0.910732662  | 1.035542265 |
| Gmpr          | GMP reductase 1                                 | 3.06    | 7.07    | 3.8    | 8.82   | 0.991088946  | 1.032688619 |
| Gpx7          | glutathione peroxidase 7 precursor              | 1.59    | 3.87    | 2.67   | 6.5    | 0.910969674  | 1.031110533 |
| Xlr3a         | X-linked lymphocyte-regulated protein 3A        | 1.09    | 2.86    | 0.67   | 2.41   | 0.885097905  | 1.029923637 |
| Ccdc3         | coiled-coil domain-containing protein 3         | 690.23  | 1663.94 | 160.91 | 329.3  | 1.268232449  | 1.028584876 |
| Sp5           | transcription factor Sp5                        | 0       | 0       | 0      | 1.04   | 0            | 1.028569152 |
| Spo11         | meiotic recombination protein SPO11 isoform b   | 0       | 0       | 2.56   | 6.26   | 0            | 1.028092307 |
| 2700046A07Rik |                                                 | 1.36    | 2.62    | 3.81   | 8.79   | 0.617202838  | 1.025271966 |
| Dnajb13       | dnaJ homolog subfamily B member 13              | 0       | 1.74    | 1.18   | 3.43   | 1.454175893  | 1.022978564 |
| Lmtk3         | serine/threonine-protein kinase LMTK3 precursor | 1.69    | 2.3     | 0.89   | 2.84   | 0.294859852  | 1.022720077 |
| Vsig8         |                                                 | 7.32    | 9.01    | 1.53   | 4.14   | 0.266786541  | 1.022630974 |
| 9930012K11Rik | hypothetical protein LOC268759 isoform 2        | 3.65    | 5.94    | 8.63   | 18.51  | 0.577704947  | 1.018606075 |
| 4930550C14Rik | hypothetical protein LOC75311                   | 3.31    | 2.54    | 4.81   | 10.75  | -0.283938509 | 1.016050688 |
| Mdga1         | MAM domain-containing                           | 5.49    | 10.3    | 1.81   | 4.68   | 0.800032389  | 1.015320799 |
| Tcp1111       | T-complex protein 11-like protein 1             | 7.62    | 10.07   | 2.77   | 6.62   | 0.360895448  | 1.015226474 |
| Cd69          | early activation antigen CD69                   | 1.07    | 2.16    | 0      | 1.02   | 0.610293791  | 1.014355293 |
| C1ra          | complement C1r-A subcomponent precursor         | 21.62   | 40.71   | 3.72   | 8.53   | 0.882794383  | 1.013689355 |
| Icam1         | intercellular adhesion molecule 1 precursor     | 129.26  | 164.56  | 194.27 | 392.8  | 0.345960022  | 1.011992791 |
| Cald1         | caldesmon 1                                     | 195.2   | 377.77  | 104.65 | 212.05 | 0.948997027  | 1.011899284 |
| Penk          | proenkephalin-A                                 | 4.69    | 9.82    | 3.32   | 7.7    | 0.927199942  | 1.009984089 |
| Id2           | DNA-binding protein inhibitor ID-2              | 2174.28 | 1606.45 | 222.14 | 447.97 | -0.436427252 | 1.008669894 |
| Pdgfd         | platelet-derived growth factor D                | 3.82    | 8.94    | 0      | 1.01   | 1.044212705  | 1.007195501 |
| Tyr           | tyrosinase precursor                            | 0.49    | 1.55    | 1.44   | 3.9    | 0.775184916  | 1.005900601 |
| Slc1a4        | neutral amino acid transporter A                | 18.48   | 20.1    | 9.17   | 19.42  | 0.115249322  | 1.005663187 |
| Ly6c1         | lymphocyte antigen 6C2 precursor                | 40.65   | 67.15   | 12.28  | 25.66  | 0.710397161  | 1.005421634 |
| Cyp2d22       | cytochrome P450, family 2, subfamily d,         | 62.98   | 44.22   | 7.9    | 16.86  | -0.50066     | 1.004854839 |
| A430110N23Rik | soluble scavenger receptor cysteine-rich        | 4.38    | 10.51   | 0.68   | 2.37   | 1.097209756  | 1.004287358 |
| Cd302         | CD302 antigen                                   | 6.71    | 12.64   | 4.8    | 10.63  | 0.823040879  | 1.003726291 |
| Plod2         | procollagen-lysine,2-oxoglutarate 5-dioxygenase | 3.01    | 3.42    | 3.97   | 8.96   | 0.140444133  | 1.002899891 |
| Hoxd8         | homeobox protein Hox-D8                         | 117.76  | 118.48  | 17.96  | 36.97  | 0.008720144  | 1.001901035 |
| Inhbb         | inhibin beta B chain precursor                  | 121.35  | 99.19   | 57.34  | 115.83 | -0.288275582 | 1.001853491 |
| Sat2          | diamine acetyltransferase 2                     | 7.33    | 4.62    | 1.89   | 4.78   | -0.567746365 | 1           |
| Arid3b        | AT-rich interactive domain-containing protein   | 4.11    | 5.07    | 0.74   | 2.48   | 0.248373225  | 1           |
| Cdk15         | cyclin-dependent kinase 15                      | 0       | 0       | 0      | 1      | 0            | 1           |
| Pla1a         | phospholipase A1 member A precursor             | 1.21    | 0       | 0      | 1      | -1.14404637  | 1           |
| Stx1b         | syntaxin-1B                                     | 0       | 0       | 0      | 1      | 0            | 1           |
| Wnt2          | protein Wnt-2 precursor                         | 0       | 0       | 0      | 1      | 0            | 1           |

| <b>Bulge Down</b> |                                                  |                 |                 |              |              |                               |                         |
|-------------------|--------------------------------------------------|-----------------|-----------------|--------------|--------------|-------------------------------|-------------------------|
| <b>GENE</b>       | <b>Description</b>                               | <b>WT Bulge</b> | <b>KO Bulge</b> | <b>WT HG</b> | <b>KO HG</b> | <b>Log2 KO Bulge/WT Bulge</b> | <b>Log2 KO HG/WT HG</b> |
| Mir5114           |                                                  | 70.08           | 0               | 0            | 79.43        | -6.151371776                  | 6.329661815             |
| Skint4            | selection and upkeep of intraepithelial T-cells  | 86.55           | 0.44            | 142.39       | 0            | -5.925966462                  | -7.163800604            |
| Mir568            |                                                  | 43.3            | 0               | 0            | 0            | -5.469234794                  | 0                       |
| Krt13             | keratin, type I cytoskeletal 13                  | 89.24           | 1.22            | 30.2         | 0.85         | -5.345135486                  | -4.075948853            |
| Cck               | cholecystokinin preproprotein                    | 207.3           | 4.29            | 3.43         | 3.04         | -5.299251307                  | -0.132951406            |
| Mir1306           |                                                  | 36.97           | 0               | 45.16        | 0            | -5.246788094                  | -5.528571319            |
| Krt27             | keratin, type I cytoskeletal 27                  | 123.6           | 2.32            | 42.75        | 11.95        | -5.229977017                  | -1.756330919            |
| Mir5122           |                                                  | 34.36           | 0               | 0            | 28.32        | -5.14404637                   | 4.873813198             |
| St6galnac5        | alpha-N-acetylgalactosaminide                    | 69.99           | 1.48            | 2.37         | 1.99         | -4.839203788                  | -0.172603107            |
| Mir671            |                                                  | 27.61           | 0               | 25.04        | 0            | -4.838447593                  | -4.702657543            |
| Sval2             | seminal vesicle antigen-like 2                   | 21.01           | 0               | 11.13        | 0            | -4.46008724                   | -3.600507645            |
| Gdf10             | bone morphogenetic protein 3B precursor          | 63.64           | 2.64            | 4.1          | 2.73         | -4.150416843                  | -0.451321617            |
| Myoc              | myocilin precursor                               | 586.87          | 35.65           | 33.32        | 3.58         | -4.003612053                  | -2.905630049            |
| Krt24             | keratin, type I cytoskeletal 24                  | 1264.3          | 83.79           | 5.59         | 4.86         | -3.89944155                   | -0.169377801            |
| Skint9            | selection and upkeep of intraepithelial T-cells  | 12.04           | 0               | 46.94        | 0            | -3.704871964                  | -5.583158004            |
| Rpl34-ps1         | ribosomal protein L34, pseudogene 1              | 14.04           | 0.29            | 13.07        | 23           | -3.543361596                  | 0.770412077             |
| Slc33a1           | large neutral amino acids transporter small      | 78.39           | 6.56            | 47.05        | 43.55        | -3.392499157                  | -0.109110999            |
| Skint3            | selection and upkeep of intraepithelial T-cells  | 8.72            | 0               | 214.86       | 0            | -3.280956314                  | -7.753952119            |
| AA465934          |                                                  | 8.04            | 0               | 8.1          | 7.15         | -3.176322773                  | -0.159066486            |
| Camk4             | calcium/calmodulin-dependent protein kinase type | 43              | 4.01            | 4.33         | 4.99         | -3.134621015                  | 0.16842047              |
| Ltpb2             | latent-transforming growth factor beta-binding   | 376.86          | 42.65           | 19.33        | 32.97        | -3.113798245                  | 0.740651003             |
| Smoc1             | SPARC-related modular calcium-binding protein 1  | 52.01           | 5.41            | 25.37        | 56.85        | -3.047868279                  | 1.133419388             |
| Ccr1              | C-C chemokine receptor type 11                   | 857.26          | 109.4           | 518.48       | 150.46       | -2.95867459                   | -1.778131373            |
| Dpysl4            | dihydropyrimidinase-related protein 4            | 6.77            | 0               | 2.29         | 0            | -2.957914599                  | -1.718087584            |
| Lrrc18            | leucine-rich repeat-containing protein 18        | 18.74           | 1.61            | 4.89         | 1.42         | -2.919000278                  | -1.283260587            |
| Ngef              | ephexin-1 isoform 1                              | 85.59           | 10.71           | 13.49        | 6.07         | -2.886459347                  | -1.035275475            |
| BB123696          |                                                  | 5.95            | 0               | 1.29         | 0            | -2.797012978                  | -1.195347598            |
| Scn5a             | sodium channel protein type 5 subunit alpha      | 5.85            | 0               | 1.27         | 0.16         | -2.776103988                  | -0.968567492            |
| 6030419C18Rik     | hypothetical protein LOC319477                   | 28.39           | 3.36            | 5.7          | 4.66         | -2.752925319                  | -0.243359043            |
| Ptchd3            | patched domain-containing protein 3              | 5.59            | 0               | 1.37         | 0            | -2.720278465                  | -1.244887059            |
| Il3ra             | interleukin-3 receptor subunit alpha precursor   | 19.46           | 2.24            | 14.9         | 2.89         | -2.658740427                  | -2.031184705            |
| Il1h4c            | histone H4                                       | 5.25            | 0               | 2.27         | 0.55         | -2.64385619                   | -1.077022242            |
| Gfra1             | GDNF family receptor alpha-1 precursor           | 238.92          | 38.03           | 29.12        | 12.89        | -2.619898059                  | -1.116675171            |
| Adora2a           | adenosine receptor A2a                           | 31.78           | 4.36            | 9.39         | 1.96         | -2.612510949                  | -1.811526573            |
| Abcb1b            | multidrug resistance protein 1                   | 23.35           | 3.01            | 14.33        | 4.89         | -2.602247631                  | -1.380018158            |
| Tmem196           | transmembrane protein 196                        | 4.65            | 0               | 0            | 0            | -2.498250868                  | 0                       |
| Serpina9          | serpin A9 precursor                              | 4.55            | 0               | 3.79         | 1.49         | -2.472487771                  | -0.943879914            |
| Krt2              | keratin, type II cytoskeletal 2 epidermal        | 4.54            | 0               | 1.25         | 0.5          | -2.469885976                  | -0.584962501            |
| Wdfy4             | WD repeat and FYVE domain containing 4           | 7.74            | 0.62            | 0.55         | 0.2          | -2.431639467                  | -0.36923381             |
| 1110032A04Rik     | small subunit of serine palmitoyltransferase B   | 4.17            | 0               | 5.73         | 6.5          | -2.370164281                  | 0.156284091             |
| Xcl1              | lymphotactin precursor                           | 4.15            | 0               | 0            | 0            | -2.364572432                  | 0                       |
| 1700019D03Rik     | hypothetical protein LOC67080                    | 65.33           | 12.34           | 1.52         | 3.4          | -2.313902859                  | 0.80407979              |
| Aass              | alpha-aminoadipic semialdehyde synthase,         | 8.15            | 0.85            | 1.24         | 0.44         | -2.306246473                  | -0.637429921            |
| Htr1b             | 5-hydroxytryptamine receptor 1B                  | 3.84            | 0               | 0            | 0            | -2.275007047                  | 0                       |
| AI506816          |                                                  | 3.78            | 0               | 3.26         | 5.75         | -2.257010618                  | 0.664034072             |
| Trpc1             | short transient receptor potential channel 1     | 19.48           | 3.3             | 2.77         | 1.98         | -2.25180715                   | -0.339252193            |
| Crp               | C-reactive protein precursor                     | 3.72            | 0               | 0            | 0            | -2.23878686                   | 0                       |
| Lhb               | lutropin subunit beta precursor                  | 3.71            | 0               | 0            | 0            | -2.23572706                   | 0                       |
| Ecm1              | extracellular matrix protein 1 precursor         | 2342.99         | 500.06          | 379.66       | 164.88       | -2.225911139                  | -1.198363026            |
| Tll1              | tolloid-like protein 1 precursor                 | 13.34           | 2.07            | 6.03         | 4.59         | -2.223734463                  | -0.330676406            |
| Arsi              | arylsulfatase I precursor                        | 14.94           | 2.43            | 3.26         | 4.48         | -2.216371148                  | 0.363322463             |
| Cybrd1            | cytochrome b reductase 1                         | 21.3            | 3.82            | 4.82         | 2            | -2.209938659                  | -0.956056652            |
| Htr1d             | 5-hydroxytryptamine receptor 1D                  | 11.37           | 1.68            | 7.89         | 3.98         | -2.206540595                  | -0.836037677            |
| Tspan8            | tetraspanin 8                                    | 91.55           | 19.31           | 20.1         | 15.08        | -2.18804275                   | -0.391975592            |
| Pvt1              |                                                  | 22.44           | 4.26            | 13.41        | 4.51         | -2.155837865                  | -1.386946112            |
| Chst13            | carbohydrate sulfotransferase 13                 | 22.17           | 4.26            | 3.56         | 2.06         | -2.13912334                   | -0.575502171            |
| Spink2            | serine protease inhibitor Kazal-type 2           | 149.27          | 33.34           | 3.71         | 3.61         | -2.129595073                  | -0.030960309            |
| Tbc1d30           | TBC1 domain family member 30                     | 8.25            | 1.13            | 2.91         | 3.13         | -2.118599935                  | 0.078973174             |
| Zdhc2             | palmitoyltransferase ZDHHC2                      | 103.93          | 23.31           | 13.9         | 7.26         | -2.109805412                  | -0.851098644            |
| Anpep             | aminopeptidase N                                 | 88.48           | 20.29           | 243.89       | 109.22       | -2.071389307                  | -1.151747831            |
| BC028528          | hypothetical protein LOC229600 precursor         | 3.17            | 0               | 0            | 0            | -2.060047384                  | 0                       |
| Upp1              | uridine phosphorylase 1                          | 22.11           | 4.65            | 7.69         | 2.85         | -2.032194487                  | -1.174497731            |
| Arddc3            | arrestin domain-containing protein 3             | 432.41          | 105.03          | 556.93       | 311.91       | -2.031259924                  | -0.834336362            |
| Unc79             | protein unc-79 homolog                           | 22.05           | 4.68            | 7.68         | 4.02         | -2.020803916                  | -0.790007678            |
| C1q3              | complement C1q-like protein 3 precursor          | 6.56            | 0.88            | 0.48         | 0.23         | -2.007653573                  | -0.26693886             |
| Abcc3             | canalicular multispecific organic anion          | 30.21           | 6.81            | 9.63         | 5.52         | -1.998613904                  | -0.705197727            |
| Fam83a            | hypothetical protein LOC239463                   | 33.26           | 7.63            | 76.28        | 60.95        | -1.989092687                  | -0.318990812            |
| Odf31             | outer dense fiber protein 3-like protein 1       | 11.94           | 2.28            | 2.06         | 1.66         | -1.980069897                  | -0.202105407            |
| BC100530          | stefin A-like protein                            | 2.87            | 0               | 0            | 0            | -1.952333566                  | 0                       |
| Slc27a3           | long-chain fatty acid transport protein 3        | 285.11          | 73.18           | 67.77        | 40.79        | -1.94746775                   | -0.718621587            |
| Cish              | cytokine-inducible SH2-containing protein        | 349.56          | 90.48           | 463.92       | 185.62       | -1.938133119                  | -1.316878882            |
| 7420461P10Rik     | hypothetical protein LOC100038657                | 4.2             | 0.36            | 0.3          | 0            | -1.934904972                  | -0.378511623            |
| Slc7a2            | low affinity cationic amino acid transporter 2   | 16.59           | 3.66            | 172.68       | 53.29        | -1.916353623                  | -1.677673242            |
| 1700056E22Rik     | hypothetical protein LOC73363                    | 2.76            | 0               | 4.01         | 3.36         | -1.910732662                  | -0.200482468            |
| Pik3r1            | phosphatidylinositol 3-kinase regulatory subunit | 430.77          | 114.64          | 239.99       | 179.09       | -1.900622492                  | -0.420255209            |
| Npnt              | nephronectin isoform b                           | 482.66          | 129.76          | 139.8        | 142.86       | -1.887071946                  | 0.031018175             |
| Cntrn5            | contactin-5 isoform 1                            | 2.68            | 0               | 0.47         | 0            | -1.879705766                  | -0.555816155            |
| Dmrtc1a           | doublesex- and mab-3-related transcription       | 2.66            | 0               | 0            | 0            | -1.871843649                  | 0                       |
| Usp18             | ubl carboxyl-terminal hydrolase 18               | 35.04           | 8.89            | 3.96         | 3.53         | -1.865556585                  | -0.13082907             |
| Mmp2              | 72 kDa type IV collagenase precursor             | 365.91          | 100.58          | 84.03        | 66.66        | -1.852809846                  | -0.329668761            |
| Nptx1             | neuronal pentraxin-1 precursor                   | 12.36           | 2.7             | 1.11         | 1.06         | -1.852322832                  | -0.034598662            |
| Adh7              | alcohol dehydrogenase class 4 mu/sigma chain     | 526.18          | 145.22          | 473.24       | 223.87       | -1.850154982                  | -1.076526149            |
| Rps23             | 40S ribosomal protein S23                        | 34.89           | 9.01            | 40.6         | 67.51        | -1.842139949                  | 0.719731057             |
| Slc15a1           | solute carrier family 15 member 1                | 67.44           | 18.2            | 116.55       | 63.9         | -1.833733449                  | -0.856984156            |
| Slc34a3           | sodium-dependent phosphate transport protein 2C  | 2.56            | 0               | 0            | 0            | -1.831877241                  | 0                       |
| Tns1              | tensin 1                                         | 448             | 125.41          | 165.48       | 68.25        | -1.828604849                  | -1.265462894            |
| Fut4-ps1          |                                                  | 2.55            | 0               | 2.94         | 0            | -1.827819025                  | -1.97819563             |











|               |                                        |       |       |      |       |             |              |
|---------------|----------------------------------------|-------|-------|------|-------|-------------|--------------|
| Trim12a       | tripartite motif-containing protein 12 | 27.43 | 13.19 | 23.5 | 12.79 | -1.00253951 | -0.829159292 |
| Tmeff2        | tomoregulin-2 precursor                | 2.22  | 0.61  | 0.46 | 0     | -1          | -0.545968369 |
| 1110020A21Rik |                                        | 10.94 | 4.97  | 4.06 | 5.61  | -1          | 0.385512887  |
| Gm5779        |                                        | 2.3   | 0.65  | 1.37 | 1.37  | -1          | 0            |
| Olfir856-ps1  |                                        | 1     | 0     | 0    | 0     | -1          | 0            |

| HG Down       |                                                  |          |          |        |       |                        |                  |
|---------------|--------------------------------------------------|----------|----------|--------|-------|------------------------|------------------|
| GENE          | Description                                      | WT Bulge | KO Bulge | WT HG  | KO HG | Log2 KO Bulge/WT Bulge | Log2 KO HG/WT HG |
| Skint3        | selection and upkeep of intraepithelial T-cells  | 8.72     | 0        | 214.86 | 0     | -3.280956314           | -7.753952119     |
| Skint4        | selection and upkeep of intraepithelial T-cells  | 86.55    | 0.44     | 142.39 | 0     | -5.925966462           | -7.163800604     |
| Mir3074-1     |                                                  | 80.19    | 93.07    | 51.02  | 0     | 0.21243266             | -5.700994494     |
| Skint9        | selection and upkeep of intraepithelial T-cells  | 12.04    | 0        | 46.94  | 0     | -3.704871964           | -5.583158004     |
| Mir1306       |                                                  | 36.97    | 0        | 45.16  | 0     | -5.246788094           | -5.528571319     |
| Pcp2          | Purkinje cell protein 2 isoform 2                | 0        | 0        | 30.94  | 0     | 0                      | -4.997292408     |
| Ear12         | eosinophil-associated, ribonuclease A family,    | 0        | 0        | 28.86  | 0     | 0                      | -4.900142226     |
| Mir671        |                                                  | 27.61    | 0        | 25.04  | 0     | -4.838447593           | -4.702657543     |
| Snora24       |                                                  | 0        | 12.48    | 16.41  | 0     | 3.752748591            | -4.121844298     |
| Krt13         | keratin, type I cytoskeletal 13                  | 89.24    | 1.22     | 30.2   | 0.85  | -5.345135486           | -4.075948853     |
| Snora75       |                                                  | 0        | 39.71    | 15.14  | 0     | 5.347311316            | -4.012568674     |
| Ear10         | eosinophil-associated, ribonuclease A family,    | 0        | 0        | 11.46  | 0     | 0                      | -3.639232163     |
| Sval2         | seminal vesicle antigen-like 2                   | 21.01    | 0        | 11.13  | 0     | -4.46008724            | -3.600507645     |
| Rptn          | repelin                                          | 0.35     | 0        | 32.42  | 1.87  | -0.432959407           | -3.541589091     |
| Btg3          | protein BTG3                                     | 0.12     | 0.11     | 11.11  | 0.04  | -0.012939056           | -3.541543432     |
| Amd1          | S-adenosylmethionine decarboxylase proenzyme 1   | 0.85     | 1.22     | 29.16  | 1.76  | 0.263034406            | -3.449896256     |
| Gjc1          | gap junction gamma-1 protein                     | 2.04     | 1.97     | 9.05   | 0     | -0.033608393           | -3.329123596     |
| Myoc          | myocilin precursor                               | 586.87   | 35.65    | 33.32  | 3.58  | -4.003612053           | -2.905630049     |
| Grp           | gastrin-releasing peptide precursor              | 0        | 0        | 28.57  | 3.03  | 0                      | -2.8752825       |
| Ear2          | eosinophil cationic protein 2 precursor          | 0        | 1.73     | 27.83  | 3.09  | 1.448900951            | -2.817398089     |
| Hmga1-rs1     | high mobility group protein HMG-I/HMG-Y isoform  | 10.83    | 15.36    | 20.64  | 2.12  | 0.467722675            | -2.794082565     |
| Syn1          | synapsin-1 isoform b                             | 0        | 0        | 5.93   | 0     | 0                      | -2.792855352     |
| Hf60b         | histocompatibility 60b                           | 2.06     | 0        | 5.75   | 0     | -1.613531653           | -2.754887502     |
| Lgals2        | galectin-2                                       | 2.63     | 2.28     | 5.22   | 0     | -0.146273733           | -2.63691458      |
| Hamp2         | hepcidin-2                                       | 8.44     | 3.29     | 5.19   | 0     | -1.137809212           | -2.629939409     |
| BC090627      |                                                  | 13.39    | 12.47    | 5.06   | 0     | -0.095316741           | -2.599317794     |
| Klk10         | kallikrein-10                                    | 6.89     | 10.69    | 201.36 | 32.42 | 0.567177725            | -2.598140506     |
| Skint11       | selection and upkeep of intraepithelial T-cells  | 5.29     | 1.12     | 4.84   | 0     | -1.568995752           | -2.545968369     |
| Col8a1        | collagen alpha-1(VIII) chain precursor           | 6.4      | 4.1      | 32.21  | 5.02  | -0.537028024           | -2.463782331     |
| Tslp          |                                                  | 4.03     | 1.34     | 4.48   | 0     | -1.10404987            | -2.454175893     |
| Gngt2         | guanine nucleotide-binding protein               | 2.28     | 7.64     | 4.32   | 0     | 1.397335498            | -2.411426246     |
| Cd72          | B-cell differentiation antigen CD72 isoform 4    | 16.28    | 34.26    | 22.16  | 3.44  | 1.028929257            | -2.383003672     |
| Il18r1        | interleukin-18 receptor 1 isoform a              | 2.5      | 2.34     | 43.43  | 7.67  | -0.067506819           | -2.357430243     |
| Cyp1b1        | cytochrome P450 1B1                              | 88.63    | 33.55    | 338.56 | 66.29 | -1.375295986           | -2.335202494     |
| 1700028B04Rik |                                                  | 0        | 0        | 3.94   | 0     | 0                      | -2.304511042     |
| Acox2         | peroxisomal acyl-coenzyme A oxidase 2            | 0.94     | 1.88     | 17.85  | 2.84  | 0.570012159            | -2.295386307     |
| Rriad1        | Riia domain-containing protein 1                 | 3.01     | 4.58     | 3.9    | 0     | 0.476662885            | -2.292781749     |
| Dmrt1         | doublesex- and mab-3-related transcription       | 0        | 0        | 3.88   | 0     | 0                      | -2.286881148     |
| Galt6         | polypeptide N-acetylgalactosaminyltransferase 6  | 0.9      | 0.79     | 22.52  | 3.85  | -0.086039831           | -2.277831408     |
| E030003E18Rik |                                                  | 1.59     | 0        | 15.87  | 2.49  | -1.372952098           | -2.273161032     |
| Col6a6        | collagen alpha-6(VI) chain isoform 1             | 0        | 0.16     | 3.77   | 0     | 0.214124805            | -2.253989266     |
| Il17b         | interleukin-17B precursor                        | 7.02     | 2.84     | 3.74   | 0     | -1.062495926           | -2.244887059     |
| Ifitm5        | interferon-induced transmembrane protein 5       | 0        | 4.02     | 3.71   | 0     | 2.327687364            | -2.23572706      |
| Crab2         | crumbs homolog 2 precursor                       | 0.36     | 0        | 3.66   | 0     | -0.443606651           | -2.220329955     |
| Col9a2        | collagen alpha-2(IX) chain precursor             | 0.35     | 0        | 3.65   | 0     | -0.432959407           | -2.217230716     |
| BC021891      | mitogen-activated protein kinase kinase          | 3.14     | 1.06     | 6.73   | 0.69  | -1.00698643            | -2.193445168     |
| Il7           | interleukin-7 precursor                          | 4.55     | 1.74     | 48.1   | 9.75  | -1.018311878           | -2.191386365     |
| Npbwr1        | neuropeptides B/WV receptor type 1               | 0.8      | 0        | 3.56   | 0     | -0.847996907           | -2.189033824     |
| Mrgprb3       | mas-related G-protein coupled receptor member    | 5.01     | 2.78     | 3.54   | 0     | -0.668978756           | -2.182692298     |
| Tmem190       | transmembrane protein 190 precursor              | 0        | 0        | 3.42   | 0     | 0                      | -2.14404637      |
| 1700016C15Rik | hypothetical protein LOC69428                    | 0        | 0        | 3.38   | 0     | 0                      | -2.13093087      |
| Gm14005       |                                                  | 0        | 3.25     | 3.2    | 0     | 2.087462841            | -2.070389328     |
| Acox1         | acyl-coenzyme A oxidase-like protein             | 1.95     | 1.96     | 30.95  | 6.75  | 0.004882221            | -2.043547716     |
| Sic22a3       | solute carrier family 22 member 3                | 51.5     | 36.19    | 38.12  | 8.55  | -0.497402675           | -2.034333732     |
| Il3ra         | interleukin-3 receptor subunit alpha precursor   | 19.46    | 2.24     | 14.9   | 2.89  | -2.658740427           | -2.031184705     |
| 4930415O20Rik | hypothetical protein LOC73863                    | 2.21     | 3.44     | 3.08   | 0     | 0.467986379            | -2.028569152     |
| Grem1         | gremlin-1 precursor                              | 755.7    | 273.5    | 279.66 | 68.27 | -1.462915296           | -2.018520885     |
| Dgkq          | diacylglycerol kinase eta                        | 1.03     | 0.64     | 10.77  | 1.93  | -0.307783913           | -2.006141751     |
| Tox2          | TOX high mobility group box family member 2      | 0        | 0        | 2.99   | 0     | 0                      | -1.996388746     |
| Fut4-ps1      |                                                  | 2.55     | 0        | 2.94   | 0     | -1.827819025           | -1.97819563      |
| Gjd3          | gap junction delta-3 protein                     | 2.03     | 0        | 2.91   | 0     | -1.599317794           | -1.967168608     |
| Fads6         | fatty acid desaturase 6                          | 5.97     | 1.17     | 2.87   | 0     | -1.683463613           | -1.952333566     |
| Cyb5r2        | NADH-cytochrome b5 reductase 2 isoform 1         | 0.6      | 0.56     | 7.54   | 1.22  | -0.036525876           | -1.943676393     |
| Eda2r         | tumor necrosis factor receptor superfamily       | 2.51     | 0        | 22.69  | 5.16  | -1.811471031           | -1.943275943     |
| Gsdma2        | gasdermin-A2                                     | 0.65     | 0.67     | 18.25  | 4.04  | 0.017382078            | -1.933362807     |
| Tnfrsf14      | tumor necrosis factor receptor superfamily       | 0        | 0        | 2.81   | 0     | 0                      | -1.929790998     |
| Il33          | interleukin-33 precursor                         | 18.82    | 11.39    | 157.04 | 40.5  | -0.677780775           | -1.92910651      |
| Krtap3-2      | keratin-associated protein 3-2                   | 2.26     | 0        | 2.8    | 0     | -1.704871964           | -1.925999419     |
| Serpina4-ps1  |                                                  | 0        | 0        | 2.77   | 0     | 0                      | -1.914564523     |
| Dbil5         | diazepam-binding inhibitor-like 5                | 2.77     | 3.55     | 2.76   | 0     | 0.271302022            | -1.910732662     |
| C1qtnf1       | complement C1q tumor necrosis factor-related     | 71.09    | 43.87    | 63.91  | 16.27 | -0.684047965           | -1.910172673     |
| Rasgrf1       | ras-specific guanine nucleotide-releasing factor | 2.67     | 0.7      | 31.23  | 7.6   | -1.110245317           | -1.905995623     |
| Slain1        | SLAIN motif-containing protein 1                 | 0.63     | 0.66     | 9.31   | 1.78  | 0.026311277            | -1.890887545     |
| 1700030C10Rik |                                                  | 5.32     | 1.22     | 8.3    | 1.58  | -1.509364882           | -1.849859651     |
| Orm1          | alpha-1-acid glycoprotein 1 precursor            | 24.42    | 8.79     | 65.81  | 17.61 | -1.376583265           | -1.843986003     |
| Chac1         | cation transport regulator-like protein 1        | 8.84     | 2.2      | 2.59   | 0     | -1.62058641            | -1.843983844     |
| Ptprcap       | protein tyrosine phosphatase receptor type       | 1.37     | 5.26     | 2.59   | 0     | 1.401275598            | -1.843983844     |
| Cdo1          | cysteine dioxygenase type 1                      | 1.31     | 2.35     | 14.06  | 3.2   | 0.536268244            | -1.842260537     |
| Ppy           | peptide YY precursor                             | 0        | 0        | 2.58   | 0     | 0                      | -1.839959587     |
| Rwd2a         | RWD domain-containing protein 2A                 | 4.7      | 2.78     | 2.58   | 0     | -0.592575685           | -1.839959587     |
| Arhgap40      | rho GTPase-activating protein 18-like            | 1.25     | 1.75     | 22.11  | 5.5   | 0.289506617            | -1.830005637     |
| Gjb6          | gap junction beta-6 protein                      | 6.68     | 1.8      | 81.6   | 22.37 | -1.456679484           | -1.821484048     |
| Stmn1-rs1     |                                                  | 1.9      | 1.93     | 2.53   | 0     | 0.014847764            | -1.819668183     |
| Dab1          | disabled homolog 1 isoform 2                     | 1.55     | 0.82     | 8.27   | 1.64  | -0.486558797           | -1.812031409     |
| Cyp2b10       | cytochrome P450 2B10 isoform 2                   | 36.86    | 20.49    | 273.47 | 77.19 | -0.817008928           | -1.811592456     |
| Adora2a       | adenosine receptor A2a                           | 31.78    | 4.36     | 9.39   | 1.96  | -2.612510949           | -1.811526573     |
| Pla2g2a       | phospholipase A2, membrane associated precursor  | 0        | 0        | 2.5    | 0     | 0                      | -1.807354922     |









|               |                                                  |        |        |         |        |              |              |
|---------------|--------------------------------------------------|--------|--------|---------|--------|--------------|--------------|
| Apobec1       | C->U-editing enzyme APOBEC-1 isoform 2           | 11.87  | 3.01   | 28.75   | 12.79  | -1.682337912 | -1.109267212 |
| Adrb3         | beta-3 adrenergic receptor                       | 2.59   | 1.46   | 11.01   | 4.57   | -0.545325528 | -1.108486918 |
| Trim72        | tripartite motif-containing protein 72           | 1.52   | 1.39   | 9.19    | 3.73   | -0.076413116 | -1.107241963 |
| Ppil6         | peptidyl-prolyl cis-trans isomerase-like 6       | 31.39  | 12.76  | 27.22   | 12.1   | -1.235067998 | -1.107151176 |
| Rarres1       | retinoic acid receptor responder (tazarotene)    | 34.53  | 23.11  | 92.5    | 42.41  | -0.559406038 | -1.106938942 |
| Cst6          | cystatin-M                                       | 43.68  | 57.8   | 1999.6  | 928.46 | 0.396186699  | -1.105968059 |
| 2310007B03Rik | hypothetical protein LOC71874                    | 1.7    | 1.41   | 30.89   | 13.83  | -0.163926261 | -1.1045855   |
| Uchl1         | ubiquitin carboxyl-terminal hydrolase isozyme    | 0      | 0      | 1.15    | 0      | 0            | -1.10433666  |
| Spns2         | protein spinster homolog 2                       | 4.11   | 5.05   | 22.39   | 9.89   | 0.243611851  | -1.102887908 |
| Angpt2        | angiopoietin-2 precursor                         | 0.71   | 2.29   | 4.9     | 1.75   | 0.944091259  | -1.101283336 |
| Grik1         | glutamate receptor, ionotropic kainate 1 isoform | 24.91  | 6.95   | 2.74    | 0.75   | -1.704482225 | -1.095683348 |
| Irgm2         | interferon inducible GTPase 2                    | 23.59  | 20.03  | 25.48   | 11.42  | -0.225622885 | -1.092237949 |
| Piwi2         | piwi-like protein 2                              | 26.32  | 13.26  | 34.62   | 15.71  | -0.937983502 | -1.091975783 |
| Syt16         | synaptotagmin-16                                 | 0.46   | 0      | 1.13    | 0      | -0.545968369 | -1.09085343  |
| Tc2n          | tandem C2 domains nuclear protein                | 2.11   | 2.22   | 1.13    | 0      | 0.050146108  | -1.09085343  |
| Alpk1         | alpha-protein kinase 1                           | 1.03   | 1.38   | 6.19    | 2.38   | 0.229481846  | -1.088968524 |
| Smagg         | small cell adhesion glycoprotein                 | 21.66  | 19.03  | 83.86   | 39.01  | -0.17798544  | -1.08472405  |
| Cd1631        | CD163 molecule-like 1                            | 1.06   | 0.54   | 1.12    | 0      | -0.419713986 | -1.084064265 |
| Rgs18         | regulator of G-protein signaling 18              | 1.14   | 1.65   | 1.12    | 0      | 0.308381563  | -1.084064265 |
| Heph1         | hephaestin-like protein 1                        | 2.34   | 0.73   | 10.67   | 4.51   | -0.949076065 | -1.082680337 |
| Rnase1        | ribonuclease pancreatic precursor                | 5.13   | 5.14   | 24.9    | 11.23  | 0.002351582  | -1.082527694 |
| Irx3          | iroquois-class homeodomain protein IRX-3         | 234.7  | 153.93 | 260.51  | 122.5  | -0.60533523  | -1.082355074 |
| 2210020M01Rik | hypothetical protein LOC66528                    | 26.85  | 19.05  | 56.25   | 26.04  | -0.474075091 | -1.082180542 |
| Chrm5         | muscarinic acetylcholine receptor M5             | 0      | 0.78   | 1.11    | 0      | 0.831877241  | -1.077242999 |
| Krtap3-3      | keratin-associated protein 3-2                   | 0      | 0      | 1.11    | 0      | 0            | -1.077242999 |
| Maob          | amine oxidase [flavin-containing] B              | 6.08   | 7.2    | 23.75   | 10.73  | 0.211874549  | -1.077225512 |
| Hist1h4c      | histone H4                                       | 5.25   | 0      | 2.27    | 0.55   | -2.64385619  | -1.07702242  |
| Fam26e        | hypothetical protein LOC103511                   | 68.83  | 78.31  | 83.57   | 39.09  | 0.18365581   | -1.076903561 |
| Adh7          | alcohol dehydrogenase class 4 mu/sigma chain     | 526.18 | 145.22 | 473.24  | 223.87 | -1.850154982 | -1.076526149 |
| 1600029D21Rik | placenta-expressed transcript 1 protein          | 160.71 | 130.03 | 1230.67 | 584.34 | -0.303511734 | -1.073268992 |
| Card10        | caspase recruitment domain-containing protein    | 27.4   | 23.45  | 74.38   | 34.87  | -0.216056465 | -1.07140405  |
| Rab11fip1     | rab11 family-interacting protein 1 isoform 1     | 12.16  | 7.91   | 28.06   | 12.83  | -0.562662152 | -1.071233546 |
| Cldn4         | claudin-4                                        | 30.62  | 33.37  | 338.44  | 160.62 | 0.120312484  | -1.070550845 |
| 3930402G23Rik |                                                  | 0      | 0      | 1.1     | 0      | 0            | -1.070389328 |
| Tspan15       | tetraspanin 15                                   | 0.99   | 1.34   | 13.61   | 5.96   | 0.233740099  | -1.069796967 |
| LOC547349     | MHC class I family member                        | 0.03   | 0.06   | 1.18    | 0.04   | 0.041419927  | -1.067744607 |
| Als2cl        | ALS2 C-terminal-like protein                     | 21.06  | 17.77  | 27.27   | 12.49  | -0.233004141 | -1.067381535 |
| Aldh3a1       | aldehyde dehydrogenase, dimeric NADP-preferring  | 126.64 | 77.75  | 1185.89 | 565.54 | -0.696728685 | -1.066936509 |
| Chit1         | chitinotriase-1 precursor                        | 31.39  | 32.22  | 109.31  | 51.72  | 0.036503605  | -1.065141307 |
| Art3          | ecto-ADP-ribosyltransferase 3                    | 10.17  | 8.61   | 50.1    | 23.43  | -0.21702085  | -1.064669428 |
| Zfp365        | protein ZNF365                                   | 38.87  | 11.99  | 55.67   | 26.11  | -1.617902175 | -1.063760089 |
| Ear5          | eosinophil cationic-type ribonuclease 5          | 33.11  | 14.47  | 24.25   | 11.08  | -1.140721558 | -1.063662933 |
| Mtmr7         | myotubularin-related protein 7                   | 3.96   | 16.43  | 25.38   | 11.63  | -0.909802191 | -1.062589925 |
| Arhgap25      | rho GTPase-activating protein 25 isoform a       | 1.3    | 1.6    | 3.49    | 1.15   | 0.176877762  | -1.062378785 |
| Dlk2          | protein delta homolog 2                          | 21.07  | 18.99  | 87.52   | 41.43  | -0.142808158 | -1.060918773 |
| Sulf1         | extracellular sulfatase Sulf-1 precursor         | 1.75   | 2.45   | 19.49   | 8.83   | 0.327164743  | -1.059656663 |
| Rel1          | RELT-like protein 1 precursor                    | 108.86 | 116.81 | 348.08  | 166.49 | 0.100795807  | -1.05948274  |
| Sic6a14       | sodium- and chloride-dependent neutral and basic | 2.76   | 2.04   | 20.69   | 9.41   | -0.306661338 | -1.059059984 |
| Gm11202       |                                                  | 7.86   | 12.61  | 5.04    | 1.9    | 0.619288463  | -1.058495649 |
| 5730469M10Rik | hypothetical protein LOC70564 precursor          | 300.17 | 179.36 | 650.47  | 312.63 | -0.739698653 | -1.054635179 |
| Tmprss2       | transmembrane protease serine 2                  | 0.83   | 0.76   | 8.49    | 3.57   | -0.05626822  | -1.054213922 |
| Gpr111        | G protein-coupled receptor 111                   | 2.34   | 2.5    | 44.2    | 20.82  | 0.067506819  | -1.050671671 |
| Amz1          | archaemetzincin-1                                | 1.03   | 2.23   | 3.93    | 1.38   | 0.670054438  | -1.050626073 |
| Pcsk9         | proprotein convertase subtilisin/kexin type 9    | 0      | 0      | 1.07    | 0      | 0            | -1.049630768 |
| Ptpn22        | tyrosine-protein phosphatase non-receptor type   | 0.58   | 2.09   | 1.07    | 0      | 0.96768228   | -1.049630768 |
| Ube2t         | ubiquitin-conjugating enzyme E2 T                | 12.51  | 18.43  | 47.67   | 22.54  | 0.524258226  | -1.047918454 |
| Bend4         | BEN domain-containing protein 4                  | 1.09   | 0.83   | 1.93    | 0.42   | -0.191659294 | -1.045009735 |
| 2010110P09Rik | calcineurin B homologous protein 2               | 2.04   | 3.15   | 1.06    | 0      | 0.449040013  | -1.042644337 |
| Arhgap15      | rho GTPase-activating protein 15 isoform 2       | 0.89   | 1.68   | 1.06    | 0      | 0.503846766  | -1.042644337 |
| Card9         | caspase recruitment domain-containing protein 9  | 1.57   | 1.56   | 1.06    | 0      | -0.005624549 | -1.042644337 |
| Clec4a1       | C-type lectin domain family 4, member a1         | 2.84   | 2.38   | 1.06    | 0      | -0.184083064 | -1.042644337 |
| Frem3         | FRAS1-related extracellular matrix protein 3     | 0      | 0      | 1.06    | 0      | 0            | -1.042644337 |
| Ncf4          | neutrophil cytosol factor 4                      | 0      | 1.28   | 1.06    | 0      | 1.189033824  | -1.042644337 |
| Sic9a7        | sodium/hydrogen exchanger 7                      | 0      | 0      | 4.54    | 1.69   | 0            | -1.042279803 |
| Crtac1        | cartilage acidic protein 1 precursor             | 0      | 0      | 2.17    | 0.54   | 0            | -1.041552489 |
| Podn          | podocan precursor                                | 12.94  | 9.63   | 7.87    | 3.31   | -0.391088964 | -1.041246235 |
| Tnfrsf4       | tumor necrosis factor receptor superfamily       | 65.95  | 40.65  | 83.58   | 40.22  | -0.68476756  | -1.036972055 |
| Orm3          | alpha-1-acid glycoprotein 3 precursor            | 0      | 1.48   | 1.05    | 0      | 1.310340121  | -1.03562391  |
| Ngf           | ephexin-1 isoform 1                              | 85.59  | 10.71  | 13.49   | 6.07   | -2.886459347 | -1.035275475 |
| Grb7          | growth factor receptor-bound protein 7           | 36.26  | 24.1   | 76.02   | 36.58  | -0.56994031  | -1.035268056 |
| Hist1h4b      | histone H4                                       | 1.89   | 0      | 1.91    | 0.42   | -1.531069493 | -1.035128223 |
| Adamts4       | ADAMTS-like protein 4 precursor                  | 404.65 | 176.82 | 65.17   | 31.3   | -1.18981789  | -1.034643115 |
| Dusp26        | dual specificity protein phosphatase 26          | 0.84   | 0      | 9.42    | 4.09   | -0.879705766 | -1.033617716 |
| Sec14a4       | SEC14-like protein 4                             | 80.15  | 39.94  | 111.11  | 53.92  | -0.987079992 | -1.029511439 |
| Ccna1         | cyclin-A1                                        | 0      | 0      | 1.04    | 0      | 0            | -1.028569152 |
| Il1f9         | interleukin-1 family member 9                    | 1.18   | 1.93   | 1.04    | 0      | 0.42657253   | -1.028569152 |
| Nrgn          | neurogranin                                      | 0      | 0      | 1.04    | 0      | 0            | -1.028569152 |
| Panx3         | pannexin-3                                       | 4.7    | 2.22   | 15.29   | 6.99   | -0.823901231 | -1.027719196 |
| Oxtr          | oxytocin receptor                                | 24.29  | 29.1   | 32.52   | 15.48  | 0.25119645   | -1.024305907 |
| Crabp2        | cellular retinoic acid-binding protein 2         | 21.18  | 34.56  | 340.28  | 167    | 0.680995959  | -1.022494638 |
| Omp           | olfactory marker protein                         | 0.74   | 0.71   | 1.03    | 0      | -0.025090981 | -1.021479727 |
| Ociad2        | OClA domain-containing protein 2                 | 73.63  | 38.62  | 97.14   | 47.41  | -0.913526806 | -1.019536177 |
| Ccnf          | cyclin-F                                         | 5.95   | 8.83   | 22.29   | 10.52  | 0.500178439  | -1.015569923 |
| Ccl27a        | C-C motif chemokine 27 isoform 1                 | 734.29 | 388.84 | 1611.94 | 797.21 | -0.915431237 | -1.014852514 |
| Gad1          | glutamate decarboxylase-like protein 1           | 1.06   | 0      | 1.02    | 0      | -1.042644337 | -1.014355293 |
| Kcne3         | potassium voltage-gated channel subfamily E      | 0.94   | 0      | 1.02    | 0      | -0.956056652 | -1.014355293 |
| Rasal1        | rasGAP-activating-like protein 1                 | 0.74   | 0.84   | 2.17    | 0.57   | 0.08061846   | -1.013718281 |
| Ncaph         | condensin complex subunit 2                      | 7.34   | 16.78  | 53.52   | 26.02  | 1.092136035  | -1.012757887 |
| Depdc1b       | DEP domain-containing protein 1B                 | 1.07   | 3.48   | 8.24    | 3.58   | 1.113867965  | -1.012545253 |
| Itga4         | integrin alpha-4                                 | 4.55   | 4.16   | 7.39    | 3.16   | -0.105116706 | -1.012087282 |
| Tmem56        | transmembrane protein 56                         | 16.33  | 5.68   | 33.72   | 16.23  | -1.375351647 | -1.010844246 |
| Tgfb3         | transforming growth factor beta-3 preproprotein  | 75.36  | 94.82  | 163.91  | 80.88  | 0.327509711  | -1.010095878 |

|          |                                                 |        |        |         |        |              |              |
|----------|-------------------------------------------------|--------|--------|---------|--------|--------------|--------------|
| Krt77    | keratin, type II cytoskeletal 1b                | 746.97 | 382.17 | 1522.06 | 755.47 | -0.964995796 | -1.009618003 |
| BC006965 |                                                 | 3.35   | 2.5    | 6.65    | 2.8    | -0.313660479 | -1.009460329 |
| Tifa     | TRAF-interacting protein with FHA               | 1.86   | 2.68   | 7.43    | 3.19   | 0.363690619  | -1.008582387 |
| Mmp17    | matrix metalloproteinase-17 precursor           | 8.11   | 3.86   | 5.92    | 2.44   | -0.90649474  | -1.008363473 |
| Was      | wiskott-Aldrich syndrome protein homolog        | 1.05   | 0.76   | 1.01    | 0      | -0.220048481 | -1.007195501 |
| Tec      | tyrosine-protein kinase Tec isoform a           | 34.95  | 29.07  | 63.19   | 30.98  | -0.257666903 | -1.005178622 |
| Gm13363  |                                                 | 2.22   | 8.62   | 29.53   | 14.22  | 1.578976206  | -1.004259231 |
| Ifngr1   | interferon gamma receptor 1 precursor           | 79.35  | 61.82  | 184.51  | 91.52  | -0.355074081 | -1.003659787 |
| Ptgs2    | prostaglandin G/H synthase 2                    | 167.04 | 223.32 | 131.64  | 65.2   | 0.416753564  | -1.00261279  |
| Acss1    | acetyl-coenzyme A synthetase 2-like,            | 11.6   | 3.32   | 21.72   | 10.34  | -1.544320516 | -1.002542195 |
| Elovl6   | elongation of very long chain fatty acids       | 58.84  | 34.78  | 335.27  | 167.07 | -0.741956788 | -1.000557845 |
| Arg1     | arginase-1                                      | 4.89   | 6.18   | 19.5    | 9.25   | 0.28571621   | -1           |
| Arhgef26 | Rho guanine nucleotide exchange factor (GEF) 26 | 6.1    | 2.94   | 13.02   | 6.01   | -0.849623395 | -1           |
| BB019430 |                                                 | 0      | 0      | 1       | 0      | 0            | -1           |
| Cfr      | cystic fibrosis transmembrane conductance       | 0      | 0      | 4.18    | 1.59   | 0            | -1           |
| Sash3    | SAM and SH3 domain-containing protein 3         | 0.79   | 0      | 1       | 0      | -0.839959587 | -1           |
| Uts2r    | urotensin-2 receptor                            | 0      | 0      | 1       | 0      | 0            | -1           |

## Supplementary Table 2 | Gene list from NFIB ChIP-seq analysis. Genes are sorted according to NFIB bound peak distribution relative to functional structure of a gene.

### PROMOTERS(±2kb)

| Transcript Name | Gene name     | Gene Description                                 |
|-----------------|---------------|--------------------------------------------------|
| NM_172505       | A730008H23Rik | Holliday junction recognition protein            |
| NM_030210       | Aacs          | acetoacetyl-CoA synthetase                       |
| NM_022419       | Abhd8         | abhydrolase domain-containing protein 8          |
| NM_001033606    | Acsf3         | long-chain-fatty-acid-CoA ligase 3 isoform a     |
| NM_027827       | Acfmid        | probable arylformamidase                         |
| NM_026375       | Ahctf1        | protein ELYS                                     |
| NM_009667       | Ampd3         | AMP deaminase 3                                  |
| NM_024213       | Anapc4        | anaphase-promoting complex subunit 4             |
| NM_011923       | Angptl2       | angiopoietin-related protein 2 precursor         |
| NR_030781       | Ankrd10       |                                                  |
| NM_013473       | Anxa8         | annexin A8                                       |
| NM_023631       | Aox4          | aldehyde oxidase 4                               |
| NM_001080819    | Arid1a        | AT-rich interactive domain-containing protein    |
| NM_001172205    | Arid5a        | AT-rich interactive domain-containing protein 5A |
| NM_023066       | Asph          | aspartyl/asparaginyl beta-hydroxylase isoform 1  |
| NM_001039939    | Asx1          | putative Polycomb group protein ASXL1            |
| NM_007498       | Atf3          | cyclic AMP-dependent transcription factor ATF-3  |
| NM_146065       | Atf7          | cyclic AMP-dependent transcription factor ATF-7  |
| NM_153389       | Atp10d        | probable phospholipid-transporting ATPase VD     |
| NM_001081182    | Atp8b2        | probable phospholipid-transporting ATPase ID     |
| NM_175183       | Atxn7l2       | ataxin-7-like protein 2                          |
| NM_198423       | Bahcc1        | BAH and coiled-coil domain-containing protein 1  |
| NM_025833       | Baiap2l1      | brain-specific angiogenesis inhibitor            |
| NM_001033284    | BC026585      | quinone oxidoreductase-like protein 2            |
| NR_015528       | BC029722      |                                                  |
| NM_001003910    | BC030307      | tetratricopeptide repeat protein GNN isoform 3   |
| NM_172295       | BC037703      | hypothetical protein LOC242125                   |
| NM_016778       | Bok           | bcl-2-related ovarian killer protein             |
| NM_009770       | Btg3          | protein BTG3                                     |
| NR_029450       | C530005A16Rik |                                                  |
| NM_009795       | Capns1        | calpain small subunit 1                          |
| NM_007616       | Cav1          | caveolin-1                                       |
| NM_016900       | Cav2          | caveolin-2                                       |
| NM_001033238    | Cblb          | E3 ubiquitin-protein ligase CBL-B                |
| NM_001037916    | Ccdc17        | coiled-coil domain-containing protein 17         |
| NM_013654       | Ccl7          | C-C motif chemokine 7                            |
| NM_001033342    | Cdc42bpg      | serine/threonine-protein kinase MRCK gamma       |
| NM_007665       | Cdh3          | cadherin-3 isoform b                             |
| NM_007668       | Cdk5          | cell division protein kinase 5                   |
| NM_177270       | Cdkl2         | cyclin-dependent kinase-like 2 isoform 2         |
| NM_177224       | Chd9          | chromodomain-helicase-DNA-binding protein 9      |
| NM_001136240    | Chdh          | choline dehydrogenase, mitochondrial precursor   |
| NM_134078       | Chmp7         | charged multivesicular body protein 7            |
| NM_022890       | Cldn12        | claudin-12                                       |
| NM_007713       | Clk3          | dual specificity protein kinase CLK3             |
| NM_028266       | Col16a1       | collagen alpha-1(XVI) chain precursor            |
| NM_009929       | Col18a1       | collagen alpha-1(XVIII) chain isoform 2          |
| NM_001161854    | Csde1         | cold shock domain-containing protein E1 isoform  |
| NM_028836       | Ctbs          | di-N-acetylchitinase                             |
| NM_001113470    | Ctdsp2        | carboxy-terminal domain RNA polymerase II        |
| NM_007795       | Ctcf          | cardiotrophin-1                                  |
| NM_001165902    | Ctnnb1        | catenin beta-1                                   |
| NM_001085449    | Ctnd1         | catenin delta-1 isoform 3                        |
| NM_030560       | Cwc22         | pre-mRNA-splicing factor CWC22 homolog           |
| NM_010010       | Cyp46a1       | cholesterol 24-hydroxylase                       |
| NM_010516       | Cyr61         | protein CYR61 precursor                          |
| NM_010015       | Dad1          | dolichyl-diphosphooligosaccharide--protein       |
| NM_001037999    | Dbi           | acyl-CoA-binding protein isoform 1               |
| NM_010024       | Dct           | L-dopachrome tautomerase precursor               |
| NM_007837       | Ddit3         | DNA damage-inducible transcript 3 protein        |
| NM_177564       | Dhrs11        | dehydrogenase/reductase SDR family member 11     |
| NM_011303       | Dhrs4         | short-chain dehydrogenase/reductase 3 isoform 1  |
| NM_027287       | Dnajb4        | dnaJ homolog subfamily B member 4                |
| NM_172338       | Dnajc16       | dnaJ homolog subfamily C member 16 precursor     |
| NM_007882       | Dsc3          | desmocollin-3                                    |
| NM_001081316    | Dsel          | dermatan-sulfate epimerase-like protein          |
| NM_013642       | Dusp1         | dual specificity protein phosphatase 1           |
| NR_029447       | E130317F20Rik |                                                  |
| NM_026598       | Ebpl          | emopamil-binding protein-like                    |
| NM_007902       | Edn2          | endothelin-2 precursor                           |
| NM_010109       | Efn5          | ephrin-A5 isoform 2                              |
| NM_010112       | Efs           | embryonal Fyn-associated substrate               |
| NM_007913       | Egr1          | early growth response protein 1                  |
| NM_182840       | Emilin3       | EMILIN-3                                         |
| NM_007680       | Ephb6         | ephrin type-B receptor 6                         |
| NM_010145       | Ephx1         | epoxide hydrolase 1                              |
| NM_176838       | Esrp2         | epithelial splicing regulatory protein 2         |
| NM_028731       | Esys2         | extended synaptotagmin-2                         |
| NM_008815       | Etv4          | ETS translocation variant 4                      |
| NM_145359       | Fam100a       | hypothetical protein LOC207740                   |
| NM_153782       | Fam20a        | family with sequence similarity 20, member A     |
| NM_134087       | Fam83h        | family with sequence similarity 83, member H     |
| NM_001122603    | Fcgbp         | Fc fragment of IgG binding protein               |
| NM_057172       | Fubp1         | far upstream element-binding protein 1           |
| NM_008059       | G0s2          | putative lymphocyte G0/G1 switch protein 2       |
| NR_029457       | G530011O06Rik |                                                  |
| NM_030166       | Galnt12       | polypeptide                                      |
| NM_001113345    | Gatad2a       | transcriptional repressor p66 alpha isoform b    |
| NM_028022       | Gatsl3        | GATS-like protein 3                              |
| NM_008112       | Gdi2          | rab GDP dissociation inhibitor beta              |
| NM_145929       | Gga1          | ADP-ribosylation factor-binding protein GGA1     |
| NR_002700       | Gm7334        |                                                  |

|              |              |                                                 |
|--------------|--------------|-------------------------------------------------|
| NM_175193    | Golim4       | Golgi integral membrane protein 4               |
| NM_026672    | Gstm7        | glutathione S-transferase Mu 7                  |
| NM_145546    | Gtf2b        | transcription initiation factor IIB             |
| NM_172810    | Gucy1b2      | guanylate cyclase soluble subunit beta-2        |
| NM_001166633 | Gytl1b       | glycosyltransferase-like protein LARGE2 isoform |
| NM_027168    | Hddc2        | HD domain-containing protein 2                  |
| NM_019479    | Hes6         | transcription cofactor HES-6                    |
| NM_198652    | Hjurp        | Holliday junction recognition protein           |
| NM_021877    | Hr           | protein hairless                                |
| NM_001130444 | Hras1        | GTPase HRas isoform 2                           |
| NM_011631    | Hsp90b1      | endoplasmic                                     |
| NM_008300    | Hspa4        | heat shock 70 kDa protein 4                     |
| NM_030704    | Hspb8        | heat shock protein beta-8                       |
| NM_010499    | ler2         | immediate early response gene 2 protein         |
| NM_030694    | Ifitm2       | interferon-induced transmembrane protein 2      |
| NM_019583    | Il17rb       | interleukin-17 receptor B precursor             |
| NM_146152    | Ipo13        | importin-13                                     |
| NM_022655    | Ireb2        | iron-responsive element-binding protein 2       |
| NM_018826    | Irx5         | iroquois-class homeodomain protein IRX-5        |
| NM_027534    | Kdsr         | 3-ketodihydroshingosine reductase precursor     |
| NM_001166651 | Klhl33       | kelch-like 33                                   |
| NM_027011    | Krt5         | keratin, type II cytoskeletal 5                 |
| NM_028770    | Krt80        | keratin, type II cytoskeletal 80                |
| NM_001113406 | Krtap11-1    | keratin associated protein 11-1                 |
| NM_008484    | Lamb3        | laminin subunit beta-3 precursor                |
| NM_025622    | Lgals2       | galectin-2                                      |
| NM_010710    | Lhx2         | LIM/homeobox protein Lhx2                       |
| NM_010720    | Lipg         | endothelial lipase precursor                    |
| NM_001081109 | Lmtk2        | serine/threonine-protein kinase LMTK2 precursor |
| NR_028378    | LOC100034739 |                                                 |
| NM_177152    | Lrig3        | leucine-rich repeats and immunoglobulin-like    |
| NM_001172064 | Lrrc56       | leucine-rich repeat-containing protein 56       |
| NM_001111311 | Lrrrip1      | leucine-rich repeat flightless-interacting      |
| NM_010771    | Matr3        | matrin-3                                        |
| NM_033072    | Mbd6         | methyl-CpG binding domain protein 6             |
| NM_175341    | Mbnl2        | muscleblind-like protein 2 isoform 1            |
| NM_008617    | Mdh2         | malate dehydrogenase, mitochondrial precursor   |
| NM_008587    | Mertk        | tyrosine-protein kinase Mer precursor           |
| NM_001045489 | Mfge8        | lactadherin isoform 2                           |
| NM_172499    | Mfsd9        | major facilitator superfamily domain-containing |
| NR_029822    | Mir125b-1    |                                                 |
| NR_029739    | Mir22        |                                                 |
| NR_030494    | Mir715       |                                                 |
| NM_027973    | Mif1ip       | centromere protein U                            |
| NM_008608    | Mmp14        | matrix metalloproteinase-14                     |
| NM_024431    | Morf4l1      | mortality factor 4-like protein 1 isoform b     |
| NM_053162    | Mrp134       | 39S ribosomal protein L34, mitochondrial        |
| NM_013602    | Mt1          | metallothionein-1                               |
| NM_181409    | Mttr11       | myotubularin-related protein 11                 |
| NM_138656    | Mvd          | diphosphomevalonate decarboxylase               |
| NM_016662    | Mxd3         | max dimerization protein 3                      |
| NM_008681    | Ndrp1        | protein NDRG1                                   |
| NR_003513    | Neat1        |                                                 |
| NM_010907    | Nfkbia       | NF-kappa-B inhibitor alpha                      |
| NM_008738    | Nrtn         | neurturin precursor                             |
| NM_027289    | Nt5dc2       | 5'-nucleotidase domain containing 2             |
| NM_198190    | Ntf5         | neurotrophin-4 precursor                        |
| NM_175749    | Nup153       | nucleoporin 153                                 |
| NM_010956    | Ogdh         | 2-oxoglutarate dehydrogenase, mitochondrial     |
| NM_153122    | Oplah        | 5-oxoprolinase                                  |
| NM_025661    | Ormdl3       | ORM1-like protein 3                             |
| NM_008772    | P2ry1        | P2Y purinoceptor 1                              |
| NM_023245    | Palmd        | palmdelphin                                     |
| NM_033581    | Pcdhgc3      | protocadherin gamma subfamily C, 3              |
| NM_008808    | Pdgfra       | platelet-derived growth factor subunit A        |
| NM_011066    | Per2         | period circadian protein homolog 2              |
| NR_028114    | Pex16        |                                                 |
| NM_021453    | Pga5         | pepsinogen 5, group I                           |
| NR_003519    | Pisd-ps2     |                                                 |
| NM_144859    | Pja2         | E3 ubiquitin-protein ligase Praja-2 isoform b   |
| NM_019762    | Pkp3         | plakophilin-3 isoform 1                         |
| NM_016915    | Pla2g6       | 85 kDa calcium-independent phospholipase A2     |
| NM_024413    | Plekhh1      | pleckstrin homology domain-containing family F  |
| NM_146030    | Plekhh3      | pleckstrin homology domain-containing family H  |
| NM_001033225 | Pnrc1        | proline-rich nuclear receptor coactivator 1     |
| NM_001081247 | Poli3a       | DNA-directed RNA polymerase III subunit RPC1    |
| NM_001034085 | Ppp2r1b      | serine/threonine-protein phosphatase 2A 65 kDa  |
| NM_008913    | Ppp3ca       | serine/threonine-protein phosphatase 2B         |
| NM_001161111 | Pqlc3        | PQ-loop repeat-containing protein 3 isoform 2   |
| NM_011104    | Prkce        | protein kinase C epsilon type                   |
| NM_175249    | Psap1        | proactivator polypeptide-like 1                 |
| NM_008956    | Ptbp1        | polypyrimidine tract-binding protein 1 isoform  |
| NM_008973    | Ptn          | pleiotrophin                                    |
| NM_009009    | Rad21        | double-strand-break repair protein rad21        |
| NM_027933    | Ranbp3       | ran-binding protein 3                           |
| NM_001146174 | Rangap1      | ran GTPase-activating protein 1                 |
| NM_028712    | Rap2b        | ras-related protein Rap-2b precursor            |
| NM_009030    | Rbtp4        | histone-binding protein RBBP4                   |
| NM_001045807 | Rbm15        | RNA binding motif protein 15                    |
| NM_001029938 | Rilp         | rab-interacting lysosomal protein               |
| NM_028810    | Rnd3         | rho-related GTP-binding protein RhoE precursor  |
| NM_001099632 | Rnf39        | ring finger protein 39                          |
| NM_031248    | Robld3       | mitogen-activated protein-binding               |
| NM_001013376 | Rpp38        | ribonuclease P protein subunit p38              |
| NM_026467    | Rps27l       | 40S ribosomal protein S27-like                  |

|              |               |                                                  |
|--------------|---------------|--------------------------------------------------|
| NM_011305    | Rxra          | retinoic acid receptor RXR-alpha                 |
| NM_025393    | S100a14       | protein S100-A14 isoform a                       |
| NM_011310    | S100a3        | protein S100-A3                                  |
| NM_011311    | S100a4        | protein S100-A4                                  |
| NM_138665    | Sardh         | sarcosine dehydrogenase, mitochondrial           |
| NM_007644    | Scarb2        | lysosome membrane protein 2                      |
| NM_198885    | Scx           | basic helix-loop-helix transcription factor      |
| NM_013657    | Sema3c        | semaphorin-3C precursor                          |
| NM_001160307 | Serpib10      | serpin B10 isoform 2                             |
| NM_009257    | Serpib5       | serpin B5                                        |
| NM_009825    | Serpinh1      | serpin H1 precursor                              |
| NM_030109    | Sf3b2         | splicing factor 3b, subunit 2                    |
| NM_028148    | Sfrs2ip       | splicing factor, arginine/serine-rich 2,         |
| NM_172276    | Sfrs8         | splicing factor, arginine/serine-rich 8          |
| NM_025858    | Shisa5        | protein shisa-5 isoform 1                        |
| NM_029415    | Slc10a6       | solute carrier family 10 member 6                |
| NM_144893    | Slc35c2       | solute carrier family 35 member C2               |
| NM_153142    | Slc35e4       | solute carrier family 35 member E4               |
| NM_026721    | Slc39a13      | zinc transporter ZIP13                           |
| NM_001081349 | Slc43a1       | large neutral amino acids transporter small      |
| NM_027872    | Slc46a3       | solute carrier family 46 member 3 precursor      |
| NM_009207    | Slc4a2        | anion exchange protein 2                         |
| NM_033314    | Slco2a1       | solute carrier organic anion transporter family  |
| NM_008541    | Smad5         | mothers against decapentaplegic homolog 5        |
| NM_026003    | Smarca2       | probable global transcription activator SNF2L2   |
| NM_025891    | Smarca3       | SWI/SNF-related matrix-associated                |
| NM_153115    | Spag11a       | sperm-associated antigen 11                      |
| NM_172561    | Spag7         | sperm-associated antigen 7 isoform 1             |
| NM_025287    | Spop          | speckle-type POZ protein                         |
| NM_009272    | Srm           | spermidine synthase                              |
| NM_009179    | St3gal2       | CMP-N-acetylneuraminic-beta-galactosamide-       |
| NM_011488    | Stat5a        | signal transducer and activator of transcription |
| NM_013515    | Stom          | erythrocyte band 7 integral membrane protein     |
| NM_175162    | Stox2         | storkhead-box protein 2 isoform 2                |
| NM_029659    | Styx11        | serine/threonine/tyrosine-interacting-like       |
| NM_194342    | Sun2          | SUN domain-containing protein 2                  |
| NM_153484    | Tef           | thyrotroph embryonic factor isoform 2            |
| NM_009369    | Tgfb1         | transforming growth factor-beta-induced protein  |
| NM_029431    | Them4         | thioesterase superfamily member 4                |
| NM_025372    | Tipin         | TIMELESS-interacting protein                     |
| NM_009387    | Tk1           | thymidine kinase, cytosolic                      |
| NM_026669    | Tmbim6        | bax inhibitor 1                                  |
| NM_026734    | Tmem126b      | transmembrane protein 126B                       |
| NM_001098271 | Tmem176a      | transmembrane protein 176A                       |
| NM_023056    | Tmem176b      | transmembrane protein 176B                       |
| NM_020588    | Tmem183a      | transmembrane protein 183 isoform a              |
| NM_178625    | Tmem209       | transmembrane protein 209                        |
| NM_144794    | Tmem63a       | transmembrane protein 63A                        |
| NM_001033535 | Tnfrsf83      | tumor necrosis factor alpha-induced protein      |
| NM_013837    | Tpst1         | protein-tyrosine sulfotransferase 1 isoform 2    |
| NM_001081055 | Trappc10      | trafficking protein particle complex subunit 10  |
| NM_023910    | Tsc22d4       | TSC22 domain family protein 4                    |
| NM_146116    | Tubb2c        | tubulin beta-2C chain                            |
| NM_019803    | Ube2g2        | ubiquitin-conjugating enzyme E2 G2               |
| NM_001039157 | Ube2j2        | ubiquitin-conjugating enzyme E2 J2 isoform a     |
| NM_033526    | Ubqln4        | ubiquilin-4                                      |
| NM_001136226 | Utp14b        | U3 small nucleolar RNA-associated protein 14     |
| NM_175158    | Utp20         | small subunit processome component 20 homolog    |
| NM_023054    | Utp3          | something about silencing protein 10             |
| NM_013933    | Vapa          | vesicle-associated membrane protein-associated   |
| NM_147776    | Vwa1          | von Willebrand factor A domain-containing        |
| NM_028875    | Xrcc3         | DNA repair protein XRCC3                         |
| NM_025970    | Zbtb8os       | protein archease                                 |
| NM_178404    | Zc3h6         | zinc finger CCCH domain-containing protein 6     |
| NM_175160    | Zdhhc1        | probable palmitoyltransferase ZDHHC1             |
| NM_001039198 | Zfhx2         | zinc finger homeobox protein 2                   |
| NM_013866    | Zfp385a       | zinc finger protein 385A                         |
| NM_146183    | Zfp428        | zinc finger protein 428                          |
| NM_030074    | Zfp687        | zinc finger protein 687                          |
| NM_146202    | Zfp768        | zinc finger protein 768                          |
| NM_026752    | Zfyve21       | zinc finger FYVE domain-containing protein 21    |
| NM_183208    | Zmiz1         | zinc finger MIZ domain-containing protein 1      |
| NM_001017955 | Zscan18       | zinc finger and SCAN domain containing 18        |
| NM_029821    | 1190003J15Rik | 5-hydroxyisourate hydrolase                      |
| NM_028166    | 1600014C10Rik | hypothetical protein LOC72244                    |
| NR_030711    | 2210403K04Rik | hypothetical protein LOC68235                    |
| NM_026629    | 2410066E13Rik |                                                  |
| NR_028428    | 2610005L07Rik |                                                  |
| NR_015483    | 2610203C20Rik |                                                  |
| NM_029366    | 2810422J05Rik | hypothetical protein LOC75620                    |
| NM_001172074 | 3110009E18Rik | hypothetical protein LOC73103 isoform 2          |
| NM_025699    | 3230401D17Rik | oxidative stress responsive 1                    |
| NM_001080709 | 4930402F06Rik | hypothetical protein LOC74854                    |
| NM_177265    | 6330512M04Rik | CD225 family protein FLJ76511 homolog            |
| NM_175521    | 6430598A04Rik | neuronal tyrosine phosphorylated adaptor for     |
| NM_175398    | 6530418L21Rik | hypothetical protein LOC109050 isoform 1         |
| NR_030708    | 6820431F20Rik |                                                  |
| NM_177205    | 9430015G10Rik | hypothetical protein LOC230996                   |
| NM_175417    | 9530008L14Rik | hypothetical protein LOC109254 isoform 1         |
| NM_177003    | 9630033F20Rik | probable fructose-2,6-bisphosphatase TIGAR       |

DOWNSTREAM ( $\pm 2$ kb)

| Transcript Name | Gene name     | Gene Description                                 |
|-----------------|---------------|--------------------------------------------------|
| NM_016689       | Aqp3          | aquaporin-3                                      |
| NM_025338       | Aurkaip1      | aurora kinase A-interacting protein              |
| NM_146082       | BC027072      | hypothetical protein LOC225004                   |
| NM_153544       | BC030867      | hypothetical protein LOC217216                   |
| NM_001122683    | Bdh1          | D-beta-hydroxybutyrate dehydrogenase,            |
| NM_178116       | Camta2        | calmodulin-binding transcription activator 2     |
| NM_027112       | Capns2        | calpain small subunit 2                          |
| NM_001033455    | Ccdc27        | coiled-coil domain-containing protein 27         |
| NM_021339       | Cdon          | cell adhesion molecule-related/down-regulated by |
| NM_015734       | Col5a1        | collagen alpha-1(V) chain precursor              |
| NM_019877       | Copz2         | coatamer subunit zeta-2                          |
| NM_001042611    | Cp            | ceruloplasmin isoform a                          |
| NM_153679       | Cpt1c         | carnitine O-palmitoyltransferase 1, brain        |
| NM_153287       | Csrnp1        | cysteine/serine-rich nuclear protein 1           |
| NM_153088       | Ctdsp1        | carboxy-terminal domain RNA polymerase II        |
| NM_009983       | Ctsd          | cathepsin D precursor                            |
| NM_010055       | Dlx3          | homeobox protein DLX-3                           |
| NM_010100       | Edar          | tumor necrosis factor receptor superfamily       |
| NM_153068       | Ehd2          | EH domain-containing protein 2                   |
| NM_010579       | Eif6          | eukaryotic translation initiation factor 6       |
| NM_207706       | Elmo2         | engulfment and cell motility protein 2 isoform   |
| NM_029001       | Elovl7        | elongation of very long chain fatty acids        |
| NM_144866       | Etf1          | eukaryotic peptide chain release factor subunit  |
| NM_194345       | Fam160b2      | family with sequence similarity 160, member B2   |
| NM_015795       | Fbxo16        | F-box only protein 16                            |
| NM_008655       | Gadd45b       | growth arrest and DNA damage-inducible protein   |
| NM_010815       | Grap2         | GRB2-related adaptor protein 2                   |
| NM_001013385    | Grm4          | metabotropic glutamate receptor 4                |
| NM_010451       | Hoxa2         | homeobox protein Hox-A2                          |
| NM_010458       | Hoxb3         | homeobox protein Hox-B3                          |
| NM_138646       | Hps4          | Hermansky-Pudlak syndrome 4 protein homolog      |
| NM_019508       | Il17b         | interleukin-17B precursor                        |
| NM_178257       | Il22ra1       | interleukin-22 receptor subunit alpha-1          |
| NM_008916       | Inpp5k        | inositol polyphosphate 5-phosphatase K           |
| NM_001163528    | Itpril1       | inositol 1,4,5-triphosphate receptor-interacting |
| NM_008416       | Junb          | transcription factor jun-B                       |
| NM_021342       | Kcne4         | potassium voltage-gated channel subfamily E      |
| NM_199364       | Lzts1         | leucine zipper putative tumor suppressor 1       |
| NM_183195       | Marveld1      | putative MARVEL domain-containing protein 1      |
| NM_010797       | Mid1          | midline-1                                        |
| NM_010798       | Mif           | macrophage migration inhibitory factor           |
| NM_021462       | Mknk2         | MAP kinase-interacting serine/threonine-protein  |
| NM_010808       | Mmp24         | matrix metalloproteinase-24                      |
| NM_010849       | Myc           | myc proto-oncogene protein isoform a             |
| NM_153136       | Nudt18        | nucleoside diphosphate-linked moiety X motif 18  |
| NM_001025614    | Otud7b        | zinc finger, A20 domain containing 1             |
| NM_148917       | Pabpc4        | polyadenylate-binding protein 4 isoform 2        |
| NM_027995       | Paqr7         | membrane progesterin receptor alpha              |
| NM_011563       | Prdx2         | peroxiredoxin-2                                  |
| NM_138659       | Prpf8         | pre-mRNA-processing-splicing factor 8            |
| NM_175022       | Prr12         | proline rich 12                                  |
| NM_177721       | Ranbp6        | ran-binding protein 6                            |
| NM_177572       | Rimk1a        | ribosomal protein S6 modification-like protein   |
| NM_030112       | Rtf1          | Paf1/RNA polymerase II complex component         |
| NM_009113       | S100a13       | protein S100-A13                                 |
| NM_009162       | Scg5          | neuroendocrine protein 7B2                       |
| NM_010831       | Sik1          | serine/threonine-protein kinase SIK1             |
| NM_172892       | Slc13a4       | solute carrier family 13, member 4               |
| NM_177243       | Slc26a9       | solute carrier family 26 member 9                |
| NM_011988       | Slc27a3       | long-chain fatty acid transport protein 3        |
| NM_031183       | Sp6           | transcription factor Sp6                         |
| NM_020564       | Sult5a1       | sulfotransferase family 5A, member 1             |
| NM_008596       | Sypl2         | synaptophysin-like protein 2                     |
| NM_134023       | Tbc1d10a      | TBC1 domain family member 10A                    |
| NM_198020       | Trmt1         | N(2),N(2)-dimethylguanosine tRNA                 |
| NM_001077591    | Tsks          | testis-specific serine kinase substrate isoform  |
| NM_011656       | Tuft1         | tuffelin                                         |
| NM_019392       | Tyro3         | tyrosine-protein kinase receptor TYRO3           |
| NM_198899       | Uggt1         | UDP-glucose:glycoprotein glucosyltransferase 1   |
| NM_025407       | Uqcrc1        | cytochrome b-c1 complex subunit 1, mitochondrial |
| NM_011756       | Zfp36         | tristetraprolin                                  |
| NM_028601       | Zmiz2         | zinc finger MIZ domain-containing protein 2      |
| NM_026150       | 4921536K21Rik | hypothetical protein LOC67430                    |
| NR_029475       | 4930581F22Rik |                                                  |
| NM_001166394    | 4931428F04Rik | hypothetical protein LOC74356                    |
| NR_015459       | 4933431E20Rik |                                                  |
| NR_015497       | 9330133O14Rik |                                                  |

## EXONS

| Transcript Name | Gene name     | Gene Description                               |
|-----------------|---------------|------------------------------------------------|
| NM_033474       | Arycf         | armadillo repeat protein deleted in            |
| NM_030561       | BC004004      | hypothetical protein LOC80748                  |
| NM_020486       | Bcam          | basal cell adhesion molecule                   |
| NM_010238       | Brd2          | bromodomain-containing protein 2 isoform a     |
| NM_017392       | Celsr2        | cadherin EGF LAG seven-pass G-type receptor 2  |
| NM_012018       | Cep110        | centriolin                                     |
| NM_013811       | Dnahc8        | dynein heavy chain 8, axonemal                 |
| NM_015794       | Fbxl17        | F-box/LRR-repeat protein 17                    |
| NM_001033312    | Fbxl18        | F-box and leucine-rich repeat protein 18       |
| NM_001085549    | Gm12824       | UPF0632 protein A precursor                    |
| NM_001039472    | Kif21b        | kinesin-like protein KIF21B                    |
| NM_016693       | Map3k6        | mitogen-activated protein kinase kinase kinase |
| NM_001085373    | Mcc           | mutated in colorectal cancers isoform 1        |
| NM_177855       | Med12l        | mediator of RNA polymerase II transcription    |
| NM_011424       | Ncor2         | nuclear receptor corepressor 2                 |
| NM_030152       | Nol3          | nucleolar protein 3                            |
| NM_133947       | Numa1         | nuclear mitotic apparatus protein 1            |
| NM_021512       | Nup160        | nuclear pore complex protein Nup160            |
| NM_026936       | Oxa1l         | mitochondrial inner membrane protein OXA1L     |
| NM_144920       | Plekha5       | phosphoinositol 3-phosphate-binding protein-2  |
| NM_019688       | Rapgef4       | rap guanine nucleotide exchange factor 4       |
| NM_146042       | Rnf144b       | E3 ubiquitin-protein ligase RNF144B            |
| NM_028182       | Sh2d4a        | SH2 domain-containing protein 4A               |
| NM_009195       | Slc12a4       | solute carrier family 12 member 4              |
| NM_152808       | Slc44a2       | choline transporter-like protein 2 isoform 2   |
| NM_001004468    | Tacc2         | transforming acidic coiled-coil-containing     |
| NM_011547       | Tcfap2a       | transcription factor AP-2-alpha isoform a      |
| NM_001081664    | 4833423E24Rik | fatty acid desaturase 2-like protein           |

## INTRONS

| Transcript Name | Gene name    | Gene Description                                 |
|-----------------|--------------|--------------------------------------------------|
| NR_028376       | A93004D18Rik |                                                  |
| NM_007378       | Abca4        | retinal-specific ATP-binding cassette            |
| NM_008576       | Abcc1        | multidrug resistance-associated protein 1        |
| NM_001103177    | Ablim1       | actin-binding LIM protein 1 isoform 2            |
| NM_001164491    | Ablim3       | actin-binding LIM protein 3                      |
| NM_198895       | Abr          | active breakpoint cluster region-related protein |
| NM_175324       | Acad11       | acyl-CoA dehydrogenase family member 11          |
| NM_207668       | Acpp         | prostatic acid phosphatase long isoform          |
| NM_053178       | Acsbg1       | long-chain-fatty-acid--CoA ligase ACSBG1         |
| NM_027976       | Acsf5        | long-chain-fatty-acid--CoA ligase 5              |
| NM_134156       | Actn1        | alpha-actinin-1                                  |
| NM_021895       | Actn4        | alpha-actinin-4                                  |
| NR_021486       | Adarb1       |                                                  |
| NM_139153       | Agap3        | arf-GAP with GTPase, ANK repeat and PH           |
| NM_146155       | Ahdc1        | AT-hook DNA-binding motif-containing protein 1   |
| NM_198111       | Akap6        | A kinase (PRKA) anchor protein 6                 |
| NM_177859       | Aknad1       | AKNA domain containing 1                         |
| NM_178655       | Ank2         | ankyrin-2 isoform 2                              |
| NM_001081379    | Ankrd11      | ankyrin repeat domain 11                         |
| NM_001081139    | Ankrd35      | ankyrin repeat domain-containing protein 35      |
| NM_007585       | Anxa2        | annexin A2                                       |
| NM_001110211    | Anxa6        | annexin A6 isoform b                             |
| NM_175164       | Arhgap26     | rho GTPase-activating protein 26                 |
| NM_001130152    | Arhgef1      | rho guanine nucleotide exchange factor 1 isoform |
| NM_027871       | Arhgef3      | rho guanine nucleotide exchange factor 3         |
| NM_001034858    | Armc2        | armadillo repeat-containing protein 2            |
| NM_010026       | Asap1        | arf-GAP with SH3 domain, ANK repeat and PH       |
| NM_025770       | Atg10        | ubiquitin-like-conjugating enzyme ATG10          |
| NM_080640       | Baalc        | brain and acute leukemia cytoplasmic protein     |
| NM_007521       | Bach2        |                                                  |
| NM_013800       | Barx2        | homeobox protein BarH-like 2                     |
| NM_172378       | BC026439     | prostaglandin-specific organic anion             |
| NM_009954       | Bcar1        | breast cancer anti-estrogen resistance protein 1 |
| NM_016707       | Bcl11a       | B-cell lymphoma/leukemia 11A isoform 1           |
| NM_001079883    | Bcl11b       | B-cell lymphoma/leukemia 11B isoform a           |
| NM_001081412    | Bcr          | breakpoint cluster region protein                |
| NM_001039179    | Bicd2        | protein bicaudal D homolog 2 isoform 1           |
| NM_172506       | Boc          | brother of CDO precursor                         |
| NM_028709       | Btdb11       | ankyrin repeat and BTB/POZ domain-containing     |
| NM_025295       | Btd          | biotinidase                                      |
| NM_181344       | C1rl         | complement C1r subcomponent-like protein         |
| NM_020263       | Cacna2d2     | voltage-dependent calcium channel subunit        |
| NM_001037099    | Cacnb4       | voltage-dependent L-type calcium channel subunit |
| NM_018883       | Camkk1       | calcium/calmodulin-dependent protein kinase      |
| NM_007602       | Capn5        | calpain-5                                        |
| NM_027195       | Cas21        | zinc finger protein castor homolog 1 isoform 2   |
| NM_001161458    | Cbfb         | core-binding factor subunit beta isoform 4       |
| NM_029212       | Ccdc33       | coiled-coil domain-containing protein 33 isoform |
| NM_029586       | Ccdc46       | coiled-coil domain-containing protein 46 isoform |
| NM_025689       | Ccdc51       | coiled-coil domain-containing protein 51         |
| NM_001039150    | Cd44         | CD44 antigen isoform b precursor                 |
| NM_183016       | Cdc42bpb     | serine/threonine-protein kinase MRCK beta        |
| NM_027219       | Cdc42ep1     | cdc42 effector protein 1                         |
| NM_009864       | Cdh1         | cadherin-1                                       |
| NM_153599       | Cdk8         | cell division protein kinase 8                   |
| NM_173370       | Cds1         | phosphatidate cytidyltransferase 1               |
| NM_009886       | Celsr1       | cadherin EGF LAG seven-pass G-type receptor 1    |
| NM_146019       | Chd3         | chromodomain helicase DNA binding protein 3      |
| NM_027979       | Chit1        | chitinase-1 precursor                            |
| NM_027928       | Chst13       | carbohydrate sulfotransferase 13                 |
| NM_019765       | Clip1        | CAP-Gly domain-containing linker protein 1       |
| NM_030179       | Clip4        | CAP-Gly domain-containing linker protein 4       |
| NM_029556       | Clybl        | citrate lyase subunit beta-like protein,         |
| NM_001160211    | Cnih3        | protein cornichon homolog 3 isoform 2            |
| NM_146105       | Cnsl         | consortin                                        |
| NM_139001       | Cspg4        | chondroitin sulfate proteoglycan 4 precursor     |
| NM_198013       | Cuedc1       | CUE domain-containing protein 1 isoform 1        |
| NM_009999       | Cyp2b10      | cytochrome P450 2B10 isoform 2                   |
| NM_007823       | Cyp4b1       | cytochrome P450 4B1                              |
| NM_001114125    | Dab2ip       | disabled homolog 2-interacting protein isoform   |
| NM_010019       | Dapk2        | death-associated protein kinase 2                |
| NM_027030       | Dcps         | scavenger mRNA-decapping enzyme DcpS             |
| NM_007584       | Ddr1         | epithelial discoidin domain-containing receptor  |
| NM_001159361    | Dip2b        | disco-interacting protein 2 homolog B isoform 1  |
| NM_027712       | Dlgap1       | disks large-associated protein 1 isoform 2       |
| NM_001163537    | Dnajc5b      | dnaJ homolog subfamily C member 5B               |
| NM_027878       | Dram1        | DNA damage-regulated autophagy modulator protein |
| NM_023842       | Dsp          | desmoplakin                                      |
| NM_019819       | Dusp14       | dual specificity protein phosphatase 14          |
| NM_199307       | Ece1         | endothelin-converting enzyme 1                   |
| NM_001162425    | Efn1         | ephrin-A1 isoform 2                              |
| NM_007912       | Egfr         | epidermal growth factor receptor isoform 2       |
| NM_172813       | Enox1        | ecto-NOX disulfide-thiol exchanger 1             |
| NM_177304       | Enpp6        | ectonucleotide pyrophosphatase/phosphodiesterase |
| NM_007940       | Ephx2        | epoxide hydrolase 2                              |
| NM_001003817    | ErbB2        | receptor tyrosine-protein kinase erbB-2          |
| NM_026170       | Ergic1       | endoplasmic reticulum-Golgi intermediate         |
| NM_177775       | Esy1         | extended synaptotagmin-3                         |
| NM_010162       | Ext1         | exostosin-1                                      |
| NM_146119       | Fam129b      | niban-like protein 1                             |
| NM_153574       | Fam13a       | family with sequence similarity 13, member A1    |
| NM_024244       | Fam13c       | hypothetical protein LOC71721 isoform 1          |



|              |         |                                                  |
|--------------|---------|--------------------------------------------------|
| NM_177628    | Fam167a | hypothetical protein LOC219148                   |
| NM_145570    | Fam176a | transmembrane protein 166                        |
| NM_026062    | Fam69a  | family with sequence similarity 69, member A     |
| NM_025850    | Fank1   | fibronectin type 3 and ankyrin repeat domains 1  |
| NM_025386    | Fbxo36  | F-box only protein 36                            |
| NM_010206    | Fgfr1   | basic fibroblast growth factor receptor 1        |
| NM_175276    | Fhod3   | FH1/FH2 domain-containing protein 3              |
| NM_030163    | Filip1l |                                                  |
| NM_021899    | Foxi2   | forkhead box protein J2                          |
| NM_199068    | Foxk1   | forkhead box protein K1                          |
| NM_019740    | Foxo3   | forkhead box protein O3                          |
| NM_053202    | Foxp1   | forkhead box protein P1 isoform 1                |
| NM_145148    | Frm4d4b | FERM domain-containing protein 4B                |
| NM_172887    | Fry     | furry homolog                                    |
| NM_028194    | Fryl    | protein furry homolog-like                       |
| NM_173739    | Galnt4  | putative polypeptide                             |
| NM_011820    | Ggt5    | gamma-glutamyltransferase 5                      |
| NM_001081125 | Gli2    | GLI-Kruppel family member GLI2                   |
| NM_023120    | Gnb1l   | guanine nucleotide-binding protein subunit       |
| NM_027694    | Golga7b | Golgin subfamily A member 7B                     |
| NM_001081126 | Gpr161  | G-protein coupled receptor 161                   |
| NM_146072    | Grik1   | glutamate receptor, ionotropic kainate 1 isoform |
| NM_001145897 | Gse1    | genetic suppressor element 1 isoform 3           |
| NM_207225    | Hdac4   | histone deacetylase 4                            |
| NM_010412    | Hdac5   | histone deacetylase 5 isoform 2                  |
| NM_010657    | Hivep3  | transcription factor HIVEP3                      |
| NM_001024720 | Hmnc1   | hemimentin 1                                     |
| NM_001146323 | Hps3    | Hermansky-Pudlak syndrome 3 protein homolog      |
| NM_183148    | Iffo2   | intermediate filament family orphan 2            |
| NM_010513    | Igf1r   | insulin-like growth factor 1 receptor            |
| NM_029646    | Il3a    | interleukin-34 isoform 2                         |
| NM_001008700 | Il4ra   | interleukin-4 receptor subunit alpha precursor   |
| NM_198411    | Inf2    | inverted formin-2                                |
| NM_001134383 | Iqsec1  | IQ motif and SEC7 domain-containing protein 1    |
| NM_001126490 | Ism1    | isthmin-1 precursor                              |
| NM_013565    | Itga3   | integrin alpha-3                                 |
| NM_001159564 | Itgb6   | integrin beta-6 precursor                        |
| NM_172471    | Itih5   | inter-alpha-trypsin inhibitor heavy chain H5     |
| NM_022417    | Itim2c  | integral membrane protein 2C                     |
| NM_001081175 | Itpkb   | inositol-trisphosphate 3-kinase B                |
| NM_181593    | Itpkc   | inositol-trisphosphate 3-kinase C                |
| NM_010586    | Itp2    | inositol 1,4,5-trisphosphate receptor type 2     |
| NM_080553    | Itp3    | inositol 1,4,5-trisphosphate receptor type 3     |
| NM_021878    | Jarid2  | protein Jumonji                                  |
| NM_010590    | Jub     | protein ajuba                                    |
| NM_010593    | Jup     | junction plakoglobin                             |
| NM_020005    | Kat2b   | histone acetyltransferase KAT2B isoform 1        |
| NM_001039056 | Kcnj15  | ATP-sensitive inward rectifier potassium channel |
| NM_029911    | Kcnk10  | potassium channel subfamily K member 10          |
| NM_130867    | Kirrel  | kin of IRRE-like protein 1 precursor             |
| NM_021366    | Klf13   | Kruppel-like factor 13                           |
| NM_008453    | Klf3    | Kruppel-like factor 3                            |
| NM_032396    | Kremen1 | kremen protein 1 precursor                       |
| NM_010680    | Lama3   | laminin subunit alpha-3                          |
| NM_008485    | Lamc2   | laminin subunit gamma-2                          |
| NM_173379    | Leprel1 | prolyl 3-hydroxylase 2 precursor                 |
| NM_008494    | Lfng    | beta-1,3-N-acetylglucosaminyltransferase lunatic |
| NM_010195    | Lgr5    | leucine-rich repeat-containing G-protein coupled |
| NM_172589    | Lhfp12  | lipoma HMGIC fusion partner-like 2 protein       |
| NM_010718    | Limk2   | LIM domain kinase 2 isoform a                    |
| NM_001111102 | Lmna    | prelamin-A/C isoform C                           |
| NM_022983    | Lpar3   | lysophosphatidic acid receptor 3                 |
| NM_001033439 | Lrch1   | leucine-rich repeat and calponin homology        |
| NM_008377    | Lrig1   | leucine-rich repeats and immunoglobulin-like     |
| NM_001170788 | Lrrc36  | leucine-rich repeat-containing protein 36        |
| NM_175641    | Ltbp4   | latent-transforming growth factor beta-binding   |
| NR_033304    | Lypd6   |                                                  |
| NM_009600    | Macf1   | microtubule-actin cross-linking factor 1         |
| NM_001004176 | Maml3   | mastermind-like 3                                |
| NM_010789    | Meis1   | homeobox protein Meis1 isoform A                 |
| NM_027756    | Mfap3l  | microfibrillar-associated protein 3-like         |
| NM_153396    | Mical3  | protein MICAL-3                                  |
| NM_00113198  | Mitf    | microphthalmia-associated transcription factor   |
| NM_029797    | Mnd1    | meiotic nuclear division protein 1 homolog       |
| NM_001081100 | Morn1   | MORN repeat-containing protein 1                 |
| NM_021509    | Moxd1   | DBH-like monooxygenase protein 1 precursor       |
| NM_080456    | Mrps6   | 28S ribosomal protein S6, mitochondrial          |
| NM_001043355 | Mtap6   | microtubule-associated protein 6 isoform 3       |
| NM_008635    | Mtap7   | ensconsin isoform 1                              |
| NM_001008542 | Mxi1    | max-interacting protein 1 isoform b              |
| NM_028021    | Myh14   | myosin-14                                        |
| NM_181072    | Myo1e   | myosin IE                                        |
| NM_010865    | Myoc    | myocilin precursor                               |
| NM_00113204  | Ncam1   | neural cell adhesion molecule 1 isoform 3        |
| NM_178772    | Nceh1   | neutral cholesterol ester hydrolase 1            |
| NM_019681    | Ncs1    | neuronal calcium sensor 1                        |
| NM_00111324  | Nedd9   | enhancer of filamentation 1 isoform 1            |
| NM_021605    | Nek7    | serine/threonine-protein kinase Nek7             |
| NM_001081656 | Neurl1B | E3 ubiquitin-protein ligase NEURL1B              |
| NM_001113210 | Nfib    | nuclear factor 1 B-type isoform 2                |
| NM_008688    | Nfic    | nuclear factor 1 C-type isoform a                |
| NM_010906    | Nfix    | nuclear factor 1 X-type isoform 2                |
| NM_001112698 | Ngf     | beta-nerve growth factor isoform B               |
| NM_001163592 | Nhs1l   | NHS-like protein 1 isoform 2                     |
| NM_001008421 | Nol10   | nucleolar protein 10                             |

|              |           |                                                  |
|--------------|-----------|--------------------------------------------------|
| NM_008719    | Npas2     | neuronal PAS domain-containing protein 2         |
| NM_001167891 | Nrg2      | pro-neuregulin-2, membrane-bound isoform         |
| NM_001004363 | Nuak1     | NUAK family SNF1-like kinase 1                   |
| NM_028778    | Nuak2     | NUAK family SNF1-like kinase 2 isoform B         |
| NM_008750    | Nxn       | nucleoredoxin                                    |
| NM_008751    | Nxph1     | neurexophilin-1 precursor                        |
| NM_011856    | Odz2      | teneurin-2                                       |
| NM_001033254 | Pak6      | serine/threonine-protein kinase PAK 6            |
| NM_053117    | Pard6g    | partitioning defective 6 homolog gamma           |
| NM_054056    | Pawr      | PRKC apoptosis WT1 regulator protein             |
| NM_029357    | Pcdh1     | protocadherin-1                                  |
| NM_001174154 | Pcdha4-g  | protocadherin alpha 4-gamma                      |
| NM_033584    | Pcdhga1   | protocadherin gamma-A1                           |
| NM_033593    | Pcdhga10  | protocadherin gamma-A10                          |
| NM_033594    | Pcdhga11  | protocadherin gamma-A11                          |
| NM_033595    | Pcdhga12  | protocadherin gamma subfamily A, 12              |
| NM_033585    | Pcdhga2   | protocadherin gamma-A2                           |
| NM_033586    | Pcdhga3   | protocadherin gamma-A3                           |
| NM_033587    | Pcdhga4   | protocadherin gamma-A4                           |
| NM_033588    | Pcdhga5   | protocadherin gamma-A5                           |
| NM_033589    | Pcdhga6   | protocadherin gamma-A6                           |
| NM_033590    | Pcdhga7   | protocadherin gamma subfamily A, 7               |
| NM_033591    | Pcdhga8   | protocadherin gamma subfamily A, 8               |
| NM_033592    | Pcdhga9   | protocadherin gamma subfamily A, 9               |
| NM_033574    | Pcdhgb1   | protocadherin gamma-B1                           |
| NM_033575    | Pcdhgb2   | protocadherin gamma-B2                           |
| NM_033576    | Pcdhgb4   | protocadherin gamma-B4                           |
| NM_033577    | Pcdhgb5   | protocadherin gamma-B5                           |
| NM_033578    | Pcdhgb6   | protocadherin gamma subfamily B, 6               |
| NM_033579    | Pcdhgb7   | protocadherin gamma-B7                           |
| NM_033580    | Pcdhgb8   | protocadherin gamma subfamily B, 8               |
| NM_011048    | Pcsk6     | paired basic amino acid cleaving system 4        |
| NM_011057    | Pdgfb     | platelet-derived growth factor subunit B         |
| NM_019417    | Pdlim4    | PDZ and LIM domain protein 4                     |
| NM_022554    | Pdlim5    | PDZ and LIM domain protein 5 isoform ENH3b       |
| NM_001081064 | Pdzd2     | PDZ domain-containing protein 2                  |
| NM_001164594 | Pdzrn4    | PDZ domain containing RING finger 4 isoform 2    |
| NM_019781    | Pex14     | peroxisomal membrane protein PEX14               |
| NM_008841    | Pik3r2    | phosphatidylinositol 3-kinase regulatory subunit |
| NM_026880    | Pink1     | serine/threonine-protein kinase PINK1,           |
| NM_145823    | Pitpnc1   | cytoplasmic phosphatidylinositol transfer        |
| NM_013630    | Pkd1      | polycystin-1 precursor                           |
| NM_019645    | Pkp1      | plakophilin-1                                    |
| NM_021280    | Plcg1     | 1-phosphatidylinositol-4,5-bisphosphate          |
| NM_172285    | Plcg2     | 1-phosphatidylinositol-4,5-bisphosphate          |
| NM_001114663 | Plcl1     | inactive phospholipase C-like protein 1          |
| NM_008875    | Pld1      | phospholipase D1                                 |
| NM_013738    | Plek2     | pleckstrin-2                                     |
| NM_031257    | Plekha2   | pleckstrin homology domain-containing family A   |
| NM_001033253 | Plekha1   | pleckstrin homology domain containing, family G  |
| NM_028199    | Plxdc1    | plexin domain-containing protein 1 isoform 2     |
| NM_001039509 | Pnkd      | probable hydrolase PNKD isoform 3                |
| NM_001034885 | Pnpla1    | patatin-like phospholipase domain-containing     |
| NM_176833    | Ppm1f     | protein phosphatase 1F                           |
| NM_001135001 | Ppp2r5c   | serine/threonine-protein phosphatase 2A 56 kDa   |
| NM_011155    | Ppp5c     | serine/threonine-protein phosphatase 5           |
| NM_001134460 | Prickle2  | prickle-like protein 2 isoform b                 |
| NM_011101    | Prkca     | protein kinase C alpha type                      |
| NM_008856    | Prkch     | protein kinase C eta type                        |
| NM_008983    | Ptprk     | receptor-type tyrosine-protein phosphatase kappa |
| NM_011215    | Ptprn2    | receptor-type tyrosine-protein phosphatase N2    |
| NM_011218    | Ptprs     | receptor-type tyrosine-protein phosphatase S     |
| NR_003368    | Pvt1      |                                                  |
| NM_009014    | Rad51l1   | DNA repair protein RAD51 homolog 2               |
| NM_001166408 | Rai14     | ankycorbin                                       |
| NM_001145834 | Ralgds    | ral guanine nucleotide dissociation stimulator   |
| NM_001039087 | Rapgef1   | Rap guanine nucleotide exchange factor (GEF) 1   |
| NM_001080925 | Rapgef1l  | rap guanine nucleotide exchange factor-like 1    |
| NM_001172122 | Rbms3     | RNA-binding motif, single-stranded-interacting   |
| NM_001081549 | Rcan1     | calcipressin-1 isoform 1                         |
| NM_007874    | Reep5     | receptor expression-enhancing protein 5          |
| NM_001085492 | Rere      | arginine-glutamic acid dipeptide repeats         |
| NM_028713    | Rftn2     | raftlin-2                                        |
| NM_177740    | Rgma      | repulsive guidance molecule A precursor          |
| NM_173402    | Rgs12     | regulator of G-protein signalling 12 isoform A   |
| NM_013646    | Rora      | nuclear receptor ROR-alpha                       |
| NM_146246    | Rp111     | retinitis pigmentosa 1-like 1 protein            |
| NM_026830    | Rreb1     | ras-responsive element-binding protein 1 isoform |
| NM_009821    | Runx1     | runt-related transcription factor 1 isoform 4    |
| NM_177225    | Samd12    | sterile alpha motif domain-containing protein    |
| NM_175021    | Samd4b    | protein Smaug homolog 2                          |
| NM_175155    | Sash1     | SAM and SH3 domain-containing protein 1          |
| NM_022886    | Scel      | sciiellin                                        |
| NM_013883    | Scmh1     | polycomb protein SCM1 isoform 1                  |
| NM_011519    | Sdc1      | syndecan-1 precursor                             |
| NM_011521    | Sdc4      | syndecan-4 precursor                             |
| NM_172800    | Sdk2      | protein sidekick-2 precursor                     |
| NM_011349    | Sema3f    | semaphorin-3F                                    |
| NM_009154    | Sema5a    | semaphorin-5A                                    |
| NM_001113486 | Sept9     | septin-9 isoform a                               |
| NM_026535    | Serpina12 | serpin A12 precursor                             |
| NM_198247    | Sertad4   | SERTA domain-containing protein 4                |
| NM_001162908 | Sesn1     | sestrin-1 isoform 1                              |
| NM_053099    | Setbp1    | SET-binding protein                              |
| NM_028385    | Setd5     | SET domain-containing protein 5                  |

|              |               |                                                   |
|--------------|---------------|---------------------------------------------------|
| NM_013834    | Sfrp1         | secreted frizzled-related protein 1 precursor     |
| NM_133220    | Sgk3          | serine/threonine-protein kinase Sgk3              |
| NM_011893    | Sh3bp2        | SH3 domain-binding protein 2 isoform a            |
| NM_133816    | Sh3bp4        | SH3 domain-binding protein 4                      |
| NM_177364    | Sh3pxd2b      | SH3 and PX domain-containing protein 2B           |
| NM_001146299 | Sh3rf2        | putative E3 ubiquitin-protein ligase SH3RF2       |
| NM_001113373 | Shank2        | SH3 and multiple ankyrin repeat domains protein   |
| NM_011385    | Ski           | ski oncogene                                      |
| NM_207651    | Slc14a2       | urea transporter 2 isoform a                      |
| NM_026244    | Slc39a9       | zinc transporter ZIP9                             |
| NM_009209    | Slc6a2        | sodium-dependent noradrenaline transporter        |
| NM_178798    | Slc7a6        | Y+L amino acid transporter 2                      |
| NM_008542    | Smad6         | mothers against decapentaplegic homolog 6         |
| NM_022315    | Smoc2         | SPARC-related modular calcium-binding protein 2   |
| NM_178362    | Sorbs1        | sorbin and SH3 domain-containing protein 1        |
| NM_030889    | Sorcs2        | VPS10 domain-containing receptor SorCS2           |
| NM_001025560 | Sox6          | transcription factor SOX-6 isoform 3              |
| NM_001144987 | Spg20         | spartin isoform a                                 |
| NM_001166463 | Spock1        | testican-1 isoform 3 precursor                    |
| NM_145134    | Spsb4         | SPRY domain-containing SOCS box protein 4         |
| NM_009177    | St3gal1       | CMP-N-acetylneuraminic acid-6-sialyltransferase 1 |
| NM_145465    | Stk24         | serine/threonine-protein kinase 24                |
| NM_029858    | Ston1         | stonin-1                                          |
| NM_028072    | Sulf2         | extracellular sulfatase Sulf-2 precursor          |
| NM_178046    | Svil          |                                                   |
| NM_018802    | Syt8          | synaptotagmin-8                                   |
| NM_001166584 | Tead1         | transcriptional enhancer factor TEF-1 isoform 1   |
| NM_011566    | Tead3         | transcriptional enhancer factor TEF-5 isoform 2   |
| NM_001080979 | Tead4         | transcriptional enhancer factor TEF-3 isoform b   |
| NM_001113464 | Tec           | tyrosine-protein kinase Tec isoform a             |
| NM_001099275 | Tekt5         | tektin-5                                          |
| NM_031199    | Tgfa          | protransforming growth factor alpha               |
| NM_178060    | Thra          | thyroid hormone receptor alpha                    |
| NM_009384    | Tiam1         | T-lymphoma invasion and metastasis-inducing       |
| NM_011594    | Timp2         | metalloproteinase inhibitor 2 precursor           |
| NM_027154    | Tmbim1        | transmembrane BAX inhibitor motif-containing      |
| NM_178874    | Tmcc2         | transmembrane and coiled-coil domains protein 2   |
| NM_019631    | Tmem45a       | transmembrane protein 45A                         |
| NM_011609    | Tnfrsf1a      | tumor necrosis factor receptor superfamily        |
| NM_027884    | Tns1          | tensin 1                                          |
| NM_001083587 | Tns3          | tensin-3                                          |
| NM_172564    | Tns4          | tensin-4 precursor                                |
| NM_175165    | Tprq          | tumor protein p63-regulated gene 1 protein        |
| NM_013718    | Trappc3       | trafficking protein particle complex subunit 3    |
| NM_023655    | Trim29        | tripartite motif-containing protein 29            |
| NM_001127262 | Trp63         | tumor protein 63 isoform f                        |
| NM_022017    | Trpv4         | transient receptor potential cation channel       |
| NM_175414    | Tspan9        | tetraspanin-9                                     |
| NM_026132    | Txndc8        | thioredoxin domain-containing protein 8           |
| NM_001160319 | Ubr4          | E3 ubiquitin-protein ligase UBR4                  |
| NM_016808    | Usp2          | ubiquitin carboxyl-terminal hydrolase 2 isoform   |
| NM_030180    | Usp54         | inactive ubiquitin carboxyl-terminal hydrolase    |
| NM_177387    | Ust           | uronyl 2-sulfotransferase                         |
| NM_020505    | Vav3          | guanine nucleotide exchange factor VAV3 isoform   |
| NM_009504    | Vdr           | vitamin D3 receptor                               |
| NM_177683    | Vgll4         | transcription cofactor vestigial-like protein 4   |
| NM_026664    | Vps53         | vacuolar protein sorting-associated protein 53    |
| NM_012038    | Vsn1          | visinin-like protein 1                            |
| NM_028640    | Whrn          | whirlin isoform 1                                 |
| NM_212438    | Wiz           | protein Wiz isoform 1                             |
| NM_009523    | Wnt4          | protein Wnt-4 precursor                           |
| NM_019573    | Wwox          | WW domain-containing oxidoreductase               |
| NM_207255    | Zfp532        | zinc finger protein 532                           |
| NM_177086    | Zmat4         | zinc finger matrin-type protein 4                 |
| NM_027230    | Zmynd8        | protein kinase C-binding protein 1                |
| NM_001168622 | Znrf1         | E3 ubiquitin-protein ligase ZNRF1 isoform b       |
| NM_028275    | 1700112E06Rik | leucine-rich repeat-containing protein C10orf11   |
| NM_025599    | 2610528E23Rik | hypothetical protein LOC66497                     |
| NM_172884    | 2900026A02Rik | hypothetical protein LOC243219                    |
| NM_028473    | 3110079O15Rik | hypothetical protein LOC73234 precursor           |
| NM_028732    | 4632428N05Rik | platelet receptor G124 isoform 1 precursor        |
| NM_026359    | 4930578I06Rik | hypothetical protein LOC67750                     |
| NM_178682    | 4933426M11Rik | hypothetical protein LOC217684                    |
| NM_178801    | 6030446N20Rik | transmembrane protein C18orf45 homolog            |
| NM_145448    | 9030617O03Rik | hypothetical protein LOC217830 precursor          |

## PROXIMAL (2-50kb)

| Transcript Name | Gene name     | Gene Description                                 |
|-----------------|---------------|--------------------------------------------------|
| NM_183188       | A2bp1         | fox-1 homolog A isoform alpha                    |
| NM_145415       | AA408296      | digestive organ expansion factor homolog         |
| NM_013454       | Abca1         | ATP-binding cassette sub-family A member 1       |
| NM_172678       | Acad9         | acyl-CoA dehydrogenase family member 9,          |
| NM_023735       | Actr3         | actin-related protein 3                          |
| NM_144899       | Adamtsl4      | ADAMTS-like protein 4 precursor                  |
| NM_133919       | Aff1          | AF4/FMR2 family member 1 isoform 2               |
| NM_145566       | Aqf2          | arf-GAP domain and FG repeats-containing protein |
| NR_024189       | AI837181      |                                                  |
| NM_172645       | AI848100      | AI848100                                         |
| NM_172393       | Aim1          | absent in melanoma 1 protein                     |
| NM_029332       | Akap13        | A kinase (PRKA) anchor protein 13                |
| NM_007436       | Aldh3a1       | aldehyde dehydrogenase, dimeric NADP-preferring  |
| NM_009663       | Alox5ap       | arachidonate 5-lipoxygenase-activating protein   |
| NM_019764       | Amotl2        | angiominin-like protein 2                        |
| NM_144524       | Angel1        | protein angel homolog 1                          |
| NM_009670       | Ank3          | ankyrin 3, epithelial isoform g                  |
| NM_153589       | Ano2          | anoctamin-2                                      |
| NM_133237       | Apcdd1        | protein APCDD1 precursor                         |
| NM_007473       | Aqp7          | aquaporin-7                                      |
| NM_013476       | Ar            | androgen receptor                                |
| NM_133674       | Arhgef5       | Rho guanine nucleotide exchange factor (GEF) 5   |
| NM_001085355    | Arid1b        | AT rich interactive domain 1B (Swi1 like)        |
| NM_007494       | Ass1          | argininosuccinate synthase                       |
| NM_026402       | Atg3          | ubiquitin-like-conjugating enzyme ATG3           |
| NM_053069       | Atg5          | autophagy protein 5                              |
| NM_144900       | Atp1a1        | sodium/potassium-transporting ATPase subunit     |
| NM_213616       | Atp2b4        | plasma membrane calcium ATPase 4 isoform x/e     |
| NM_026468       | Atp5g2        | ATP synthase lipid-binding protein,              |
| NM_016843       | Atxn10        | ataxin-10                                        |
| NR_028382       | B230319C09Rik |                                                  |
| NM_177897       | B4galnt4      | N-acetyl-beta-glucosaminyl-glycoprotein          |
| NM_007520       | Bach1         | transcription regulator protein BACH1            |
| NM_013863       | Bag3          | BAG family molecular chaperone regulator 3       |
| NM_001044750    | Banf2         | barrier-to-autointegration factor-like protein   |
| NR_027893       | BB123696      |                                                  |
| NR_024085       | BC006965      |                                                  |
| NM_145601       | BC016201      | cDNA sequence BC016201 isoform 2                 |
| NM_145972       | BC027231      | hypothetical protein LOC212547                   |
| NM_173022       | BC048403      | hypothetical protein LOC270802                   |
| NM_001164369    | Bcas1         | breast carcinoma-amplified sequence 1 homolog    |
| NM_207681       | Bcl2l11       | bcl-2-like protein 11 isoform 2                  |
| NM_030256       | Bcl9l         | B-cell CLL/lymphoma 9-like protein               |
| NM_199028       | Bend3         | BEN domain-containing protein 3                  |
| NM_007556       | Bmp6          | bone morphogenetic protein 6 precursor           |
| NM_007559       | Bmp8b         | bone morphogenetic protein 8B precursor          |
| NM_009758       | Bmpr1a        | bone morphogenetic protein receptor type-1A      |
| NM_007562       | Bnc1          | zinc finger protein basoanudin-1                 |
| NM_172870       | Bnc2          | zinc finger protein basoanudin-2                 |
| NM_027453       | Btf3l4        | transcription factor BTF3 homolog 4              |
| NM_177584       | Btla          | B- and T-lymphocyte attenuator isoform 2         |
| NR_015546       | C130026L21Rik |                                                  |
| NM_198037       | Cachd1        | VWFA and cache domain-containing protein 1       |
| NM_001008706    | Calm5         | calmodulin 5                                     |
| NM_027416       | Calm3         | calmodulin-like protein 3                        |
| NM_144817       | Camk1g        | calcium/calmodulin-dependent protein kinase type |
| NM_001039139    | Camk2g        | calcium/calmodulin-dependent protein kinase type |
| NM_145595       | Cbr4          | carbonyl reductase family member 4               |
| NM_175369       | Ccdc122       | coiled-coil domain-containing protein 122        |
| NM_007631       | Ccnd1         | G1/S-specific cyclin-D1                          |
| NM_007635       | Ccng2         | cyclin-G2                                        |
| NM_019937       | Ccn1          | cyclin-L1                                        |
| NM_007719       | Ccr7          | C-C chemokine receptor type 7 precursor          |
| NM_153098       | Cd109         | CD109 antigen precursor                          |
| NM_010818       | Cd200         | OX-2 membrane glycoprotein precursor             |
| NM_001111059    | Cd34          | hematopoietic progenitor cell antigen CD34       |
| NM_001033122    | Cd69          | early activation antigen CD69                    |
| NM_009856       | Cd83          | CD83 antigen precursor                           |
| NM_007657       | Cd9           | CD9 antigen                                      |
| NM_007658       | Cdc25a        | M-phase inducer phosphatase 1                    |
| NM_001033373    | Cdk15         | cell division protein kinase 15                  |
| NM_008795       | Cdk18         | cell division protein kinase 18                  |
| NM_001111099    | Cdkn1a        | cyclin-dependent kinase inhibitor 1              |
| NM_009884       | Cebpg         | CCAAT/enhancer-binding protein gamma             |
| NM_145475       | Cerk          | ceramide kinase                                  |
| NM_172759       | Ces5          | carboxylesterase 5                               |
| NM_001081345    | Chd2          | chromodomain helicase DNA binding protein 2      |
| NM_001081417    | Chd7          | chromodomain-helicase-DNA-binding protein 7      |
| NM_027882       | Cic           | protein capicua homolog isoform a                |
| NM_010828       | Cited2        | cbp/p300-interacting transactivator 2            |
| NM_175451       | Ckap4         | cytoskeleton-associated protein 4                |
| NM_171826       | Cldnd1        | claudin domain-containing protein 1              |
| NM_013748       | Clnk          | cytokine-dependent hematopoietic cell linker     |
| NM_027294       | Cntm8         | CKLF-like MARVEL transmembrane domain-containing |
| NM_033570       | Cnnm4         | metal transporter CNNM4                          |
| NM_009931       | Col4a1        | collagen alpha-1(IV) chain precursor             |
| NM_027904       | Cpn2          | carboxypeptidase N subunit 2                     |
| NM_007759       | Crabp2        | cellular retinoic acid-binding protein 2         |
| NM_015800       | Crim1         | cysteine-rich motor neuron 1 protein precursor   |
| NM_024223       | Crip2         | cysteine-rich protein 2                          |
| NM_146087       | Csnk1a1       | casein kinase I isoform alpha                    |
| NM_007791       | Csrp1         | cysteine and glycine-rich protein 1              |

|              |               |                                                  |
|--------------|---------------|--------------------------------------------------|
| NM_133710    | Ctdspl        | CTD small phosphatase-like protein               |
| NM_023465    | Ctnnbp1       | beta-catenin-interacting protein 1               |
| NM_019568    | Cxcl14        | C-X-C motif chemokine 14 precursor               |
| NM_007722    | Cxcr7         | C-X-C chemokine receptor type 7                  |
| NM_025558    | Cyb5b         | cytochrome b5 type B precursor                   |
| NM_029787    | Cyb5r3        | NADH-cytochrome b5 reductase 3                   |
| NM_007814    | Cyp2b19       | cytochrome P450 2B19                             |
| NM_001101478 | D3Erttd254e   | hypothetical protein LOC241944                   |
| NM_026102    | Daam1         | disheveled-associated activator of morphogenesis |
| NM_029723    | Dapl1         | death-associated protein-like 1                  |
| NM_207533    | Dbx2          | developing brain homeobox 2                      |
| NM_178896    | Dcun1d4       | DCN1-like protein 4 isoform B                    |
| NM_026993    | Ddah1         | N(G),N(G)-dimethylarginine                       |
| NM_007916    | Ddx19a        | ATP-dependent RNA helicase DDX19A                |
| NM_007853    | Degs1         | sphingolipid delta(4)-desaturase DES1            |
| NM_024440    | Derl3         | derlin-3                                         |
| NM_015814    | Dkk3          | dickkopf-related protein 3 precursor             |
| NM_007865    | Dll1          | delta-like protein 1 precursor                   |
| NM_001081371 | Dmx1          | dmx-like protein 1                               |
| NM_018808    | Dnajb1        | dnaJ homolog subfamily B member 1                |
| NM_020266    | Dnajb2        | dnaJ homolog subfamily B member 2 isoform 1      |
| NM_019759    | Dpt           | dermatopontin precursor                          |
| NM_181680    | Dsg1c         | desmoglein-1-gamma precursor                     |
| NR_015511    | E030011O05Rik |                                                  |
| NR_015614    | E230029C05Rik |                                                  |
| NM_010332    | Ednra         | endothelin-1 receptor precursor                  |
| NM_007910    | Efna4         | ephrin-A4 precursor                              |
| NM_178444    | Egfl7         | epidermal growth factor-like protein 7 isoform 1 |
| NM_145139    | Eif3l         | eukaryotic translation initiation factor 3       |
| NM_145625    | Eif4b         | eukaryotic translation initiation factor 4B      |
| NM_023479    | Elac2         | zinc phosphodiesterase ELAC protein 2            |
| NM_148941    | Elov14        | elongation of very long chain fatty acids        |
| NM_134255    | Elov15        | elongation of very long chain fatty acids        |
| NM_023119    | Eno1          | alpha-enolase                                    |
| NM_019427    | Epb4.114b     | band 4,1-like protein 4B                         |
| NM_010143    | Ephb3         | ephrin type-B receptor 3 precursor               |
| NM_026067    | Eri1          | 3'-5' exonuclease 1                              |
| NM_133753    | Errf1         | ERBB receptor feedback inhibitor 1               |
| NM_011809    | Ets2          | protein C-ets-2                                  |
| NM_010165    | Eya2          | eyes absent homolog 2                            |
| NM_172647    | F11r          | junctional adhesion molecule A precursor         |
| NM_010171    | F3            | tissue factor precursor                          |
| NM_178764    | Fam168a       | hypothetical protein LOC319604                   |
| NM_175514    | Fam171b       | family with sequence similarity 171, member B    |
| NM_138746    | Fam50b        | DNA segment, human D6S2654E                      |
| NM_026143    | Far1          | fatty acyl-CoA reductase 1                       |
| NM_175127    | Fbxo28        | F-box only protein 28                            |
| NM_010193    | Fem1b         | protein fem-1 homolog B                          |
| NM_010197    | Fgf1          | heparin-binding growth factor 1 precursor        |
| NM_008010    | Fgfr3         | fibroblast growth factor receptor 3 isoform 1    |
| NM_001033301 | Fhd1          | FH2 domain-containing protein 1                  |
| NM_018881    | Fmo2          | dimethylaniline monooxygenase [N-oxide-forming]  |
| NM_010234    | Fos           | proto-oncogene c-Fos                             |
| NM_008037    | Fosl2         | fos-related antigen 2                            |
| NM_183298    | Foxe1         | forkhead box protein E1                          |
| NM_194060    | Foxo6         | forkhead box protein O6                          |
| NM_013522    | Frg1          | protein FRG1                                     |
| NM_028127    | Frmf6         | FERM domain-containing protein 6                 |
| NM_016893    | Fut8          | alpha-(1,6)-fucosyltransferase                   |
| NM_020510    | Fzd2          | frizzled-2 precursor                             |
| NM_008086    | Gas1          | growth arrest-specific protein 1                 |
| NM_008091    | Gata3         | trans-acting T-cell-specific transcription       |
| NM_153564    | Gbp5          | guanylate-binding protein 5                      |
| NM_010276    | Gem           | GTP-binding protein GEM                          |
| NM_010279    | Gfra1         | GDNF family receptor alpha-1 precursor           |
| NM_020014    | Gfra4         | GDNF family receptor alpha-4 isoform 2           |
| NM_008130    | Gli3          | zinc finger protein GLI3                         |
| NR_027829    | Gm10638       |                                                  |
| NR_026944    | Gm10941       |                                                  |
| NR_015474    | Gm14047       |                                                  |
| NM_001127576 | Gm1564        | hypothetical protein LOC268491                   |
| NM_201366    | Gm1631        | hypothetical protein LOC381371                   |
| NM_001033403 | Gm1968        | hypothetical protein LOC328657                   |
| NR_028424    | Gm2176        |                                                  |
| NM_001033333 | Gm239         | hypothetical protein LOC237558                   |
| NM_198657    | Gm5148        | hypothetical protein LOC381438                   |
| NM_001101609 | Gm9376        | hypothetical protein LOC668814                   |
| NM_001042672 | Gpcpd1        | putative glycerophosphocholine phosphodiesterase |
| NM_133776    | Gpr110        | G-protein coupled receptor 110 precursor         |
| NM_001033493 | Gpr111        | G protein-coupled receptor 111                   |
| NM_019925    | Gpr132        | probable G-protein coupled receptor 132          |
| NM_177366    | Gpr157        | probable G-protein coupled receptor 157          |
| NM_181444    | Gprc5a        | retinoic acid-induced protein 3                  |
| NM_183209    | Gprin2        | G protein-regulated inducer of neurite outgrowth |
| NM_001033498 | Gramd2        | GRAM domain-containing protein 2                 |
| NM_019518    | Grasp         | general receptor for phosphoinositides           |
| NM_001033426 | Grxcr2        | glutaredoxin domain-containing cysteine-rich     |
| NM_146120    | Gsn           | gelsolin precursor                               |
| NM_001080746 | Gtf2i         | general transcription factor II-I isoform 1      |
| NM_010376    | H13           | minor histocompatibility antigen H13 isoform 2   |
| NM_175000    | Hbq1          | hemoglobin, theta T2                             |
| NM_145567    | Hibadh        | 3-hydroxyisobutyrate dehydrogenase,              |
| NM_010431    | Hif1a         | hypoxia-inducible factor 1-alpha                 |
| NM_025812    | Hmg20a        | high mobility group protein 20A                  |
| NM_010439    | Hmqb1         | high mobility group protein B1                   |

|              |          |                                                  |
|--------------|----------|--------------------------------------------------|
| NM_053263    | Hnrnpa3  | heterogeneous nuclear ribonucleoprotein A3       |
| NM_175606    | Hopx     | homeodomain-only protein                         |
| NM_008266    | Hoxb1    | homeobox protein Hox-B1                          |
| NM_016677    | Hpcal1   | hippocalcin-like protein 1                       |
| NM_021429    | Hs1bp3   | HCLS1-binding protein 3                          |
| NM_010480    | Hsp90aa1 | heat shock protein HSP 90-alpha                  |
| NM_010479    | Hspa1a   | heat shock 70 kDa protein 1A                     |
| NM_031166    | Id4      | DNA-binding protein inhibitor ID-4               |
| NM_008329    | Ifi204   | interferon-activable protein 204                 |
| NM_009879    | Ifit81   | intraflagellar transport protein 81 homolog      |
| NM_001122737 | Igf2     | insulin-like growth factor II isoform 2          |
| NM_010518    | Igfbp5   | insulin-like growth factor-binding protein 5     |
| NM_010550    | Il11ra2  | interleukin-11 receptor subunit alpha-2          |
| NM_001127363 | Inpp5a   | inositol polyphosphate-5-phosphatase A isoform   |
| NM_016721    | Iqgap1   | ras GTPase-activating-like protein IQGAP1        |
| NM_001164598 | Irf2bp2  | interferon regulatory factor 2 binding protein   |
| NM_015783    | Isg15    | ubiquitin-like protein ISG15 precursor           |
| NM_008410    | Itn2b    | integral membrane protein 2B                     |
| NM_001033380 | Itprip12 | inositol 1,4,5-triphosphate receptor-interacting |
| NM_027391    | Iyd      | iodotyrosine dehalogenase 1 precursor            |
| NM_010592    | Jund     | transcription factor jun-D                       |
| NM_001081140 | Kcna10   | potassium voltage-gated channel subfamily A      |
| NM_025734    | Kcng4    | potassium voltage-gated channel subfamily G      |
| NR_027627    | Kcnk2    |                                                  |
| NM_001097621 | Kif26a   | kinesin-like protein KIF26A                      |
| NM_178357    | Kif11    | Krueppel-like factor 11                          |
| NM_023184    | Kif15    | Krueppel-like factor 15                          |
| NM_010637    | Kif4     | Krueppel-like factor 4                           |
| NM_011803    | Kif6     | Krueppel-like factor 6                           |
| NM_010638    | Kif9     | Krueppel-like factor 9                           |
| NM_001039042 | Kik13    | kallikrein 13 precursor                          |
| NM_001159374 | Krt32    | keratin, type I cuticular Ha2                    |
| NM_212483    | Krt42    | keratin, type I cytoskeletal 42                  |
| NM_008476    | Krt6a    | keratin, type II cytoskeletal 6A                 |
| NM_212487    | Krt78    | keratin Kb40                                     |
| NM_031170    | Krt8     | keratin, type II cytoskeletal 8                  |
| NM_008477    | Ktn1     | kinectin                                         |
| NM_008640    | Laptm4a  | lysosomal-associated transmembrane protein 4A    |
| NM_010691    | Lbx1     | transcription factor Lbx1                        |
| NM_010699    | Ldha     | L-lactate dehydrogenase A chain isoform 1        |
| NM_001081272 | Ldlrad1  | low-density lipoprotein receptor class A         |
| NM_178886    | Ldlrad3  | low-density lipoprotein receptor class A         |
| NM_145554    | Ldlrap1  | low density lipoprotein receptor adapter protein |
| NM_027042    | Lepl1    | late cornified envelope-like proline-rich        |
| NM_001083188 | Lig1     | DNA ligase 1                                     |
| NM_019980    | Litaf    | lipopolysaccharide-induced tumor necrosis        |
| NM_001081150 | Lonrf1   | LON peptidase N-terminal domain and RING finger  |
| NM_178665    | Lpp      | lipoma-preferred partner homolog isoform 1       |
| NM_153542    | Lrrc20   | leucine-rich repeat-containing protein 20        |
| NM_026309    | Lsm3     | U6 snRNA-associated Sm-like protein LSM3         |
| NM_026915    | Lyzl4    | lysozyme-like protein 4 precursor                |
| NM_001013813 | Maml2    | mastermind like 2 isoform 1                      |
| NM_145569    | Mat2a    | S-adenosylmethionine synthase isoform type-2     |
| NM_001081160 | Mdga1    | MAM domain-containing                            |
| NM_172424    | Med13l   | mediator of RNA polymerase II transcription      |
| NM_026039    | Med18    | mediator of RNA polymerase II transcription      |
| NM_026119    | Med4     | mediator of RNA polymerase II transcription      |
| NM_153749    | Mill1    | MHC I like leukocyte 1                           |
| NR_029567    | Mir129-1 |                                                  |
| NR_029587    | Mir200b  |                                                  |
| NR_029592    | Mir205   |                                                  |
| NR_029773    | Mir345   |                                                  |
| NR_030491    | Mir710   |                                                  |
| NR_030439    | Mir760   |                                                  |
| NM_008626    | Mrc2     | C-type mannose receptor 2 precursor              |
| NM_025796    | Mrp133   | 39S ribosomal protein L33, mitochondrial         |
| NM_025927    | Mrp145   | 39S ribosomal protein L45, mitochondrial         |
| NM_023331    | Mrp146   | 39S ribosomal protein L46, mitochondrial         |
| NM_001024917 | N4bp2    | Nedd4 binding protein 2                          |
| NM_194335    | Naif1    | nuclear apoptosis-inducing factor 1              |
| NM_008675    | Nbl1     | neuroblastoma suppressor of tumorigenicity 1     |
| NM_025424    | Nenf     | neudesin precursor                               |
| NM_001047159 | Net1     | neuroepithelial cell-transforming gene 1 protein |
| NM_010903    | Nfe2l3   | nuclear factor erythroid 2-related factor 3      |
| NM_017373    | Nfil3    | nuclear factor interleukin-3-regulated protein   |
| NM_008689    | Nfkb1    | nuclear factor NF-kappa-B p105 subunit           |
| NM_001109985 | Nos1ap   | carboxyl-terminal PDZ ligand of neuronal nitric  |
| NM_001163504 | Nr1h4    | bile acid receptor isoform 2                     |
| NM_008173    | Nr3c1    | glucocorticoid receptor                          |
| NM_001036293 | Nrbf2    | nuclear receptor-binding factor 2                |
| NM_019761    | Nxt1     | NTF2-related export protein 1                    |
| NM_145153    | Oas1f    | 2'-5'-oligoadenylate synthetase 1F               |
| NM_175360    | Obfc1    | CST complex subunit STN1                         |
| NM_008757    | Odf1     | outer dense fiber protein 1                      |
| NM_172143    | Ofcc1    | orofacial cleft 1 candidate gene 1 protein       |
| NM_052976    | Ophn1    | oligophrenin-1                                   |
| NM_007538    | Opn1sw   | blue-sensitive opsin                             |
| NM_144500    | Osbpl2   | oxysterol-binding protein-related protein 2      |
| NM_027950    | Osgin1   | oxidative stress-induced growth inhibitor 1      |
| NM_001159509 | Pacsin2  | protein kinase C and casein kinase substrate in  |
| NM_145962    | Pank3    | pantothenate kinase 3                            |
| NM_029595    | Pbp2     | phosphatidylethanolamine-binding protein 2       |
| NM_018814    | Pcnx     | pecanex-like protein 1                           |
| NM_016798    | Pdlim3   | PDZ and LIM domain protein 3                     |
| NM_018884    | Pdzrn3   | E3 ubiquitin-protein ligase PDZRN3               |

|              |           |                                                           |
|--------------|-----------|-----------------------------------------------------------|
| NM_033602    | Peli2     | protein pellino homolog 2                                 |
| NM_011065    | Per1      | period circadian protein homolog 1                        |
| NM_001042407 | Pex10     | peroxisome biogenesis factor 10                           |
| NM_133232    | Pfkfb3    | 6-phosphofructo-2-kinase/fructose-2,6-phosphofructokinase |
| NM_019703    | Pfkfb3    | 6-phosphofructokinase type C                              |
| NM_008831    | Phb       | prohibitin                                                |
| NM_007905    | Phc1      | polyhomeotic-like protein 1 isoform A                     |
| NM_013750    | Phlda3    | pleckstrin homology-like domain family A member           |
| NM_133821    | Phlpp1    | PH domain leucine-rich repeat-containing protein          |
| NM_026078    | Piqc      | phosphatidylinositol                                      |
| NM_013784    | Pign      | GPI ethanolamine phosphate transferase 1                  |
| NM_029094    | Pik3cb    | phosphatidylinositol-4,5-bisphosphate 3-kinase            |
| NM_001146200 | Pik3cg    | phosphatidylinositol-4,5-bisphosphate 3-kinase            |
| NM_177905    | Piwil4    | piwi-like protein 4                                       |
| NM_001164203 | Plec      | plectin isoform 1hij                                      |
| NM_153804    | Plekhg3   | pleckstrin homology domain-containing family G            |
| NM_008882    | Plxna2    | plexin-A2 precursor                                       |
| NM_011141    | Pou3f1    | POU domain, class 3, transcription factor 1               |
| NM_008904    | Ppargc1a  | peroxisome proliferator-activated receptor gamma          |
| NM_008909    | Ppl       | perioplakin                                               |
| NM_133485    | Ppp1r14c  | protein phosphatase 1 regulatory subunit 14C              |
| NM_133819    | Ppp1r15b  | protein phosphatase 1 regulatory subunit 15B              |
| NM_016854    | Ppp1r3c   | protein phosphatase 1 regulatory subunit 3C               |
| NM_001161362 | Ppp2r3a   | protein phosphatase 2, regulatory subunit B"              |
| NM_011103    | Prkcd     | protein kinase C delta type                               |
| NM_008859    | Prkcc     | protein kinase C theta type                               |
| NM_011170    | Prnp      | major prion protein precursor                             |
| NM_001128605 | Psen2     | presenilin-2                                              |
| NM_011968    | Psmc6     | proteasome subunit alpha type-6                           |
| NM_022415    | Ptges     | prostaglandin E synthase                                  |
| NM_001130409 | Ptk2      | focal adhesion kinase 1 isoform 2                         |
| NM_008977    | Ptpn2     | tyrosine-protein phosphatase non-receptor type 2          |
| NM_001160221 | Pum2      | pumilio homolog 2 isoform 2                               |
| NM_001033206 | Pwwp2b    | PWWP domain containing 2 isoform 2                        |
| NM_001033267 | Qrich2    | glutamine rich 2                                          |
| NM_153559    | Qsox2     | sulfhydryl oxidase 2                                      |
| NM_016676    | Rab10     | ras-related protein Rab-10                                |
| NM_009003    | Rab4a     | ras-related protein Rab-4A                                |
| NM_145510    | Rabif     | guanine nucleotide exchange factor MSS4                   |
| NM_009021    | Rai1      | retinoic acid-induced protein 1                           |
| NM_022327    | Ralb      | ras-related protein Ral-B precursor                       |
| NM_011244    | Rarg      | retinoic acid receptor gamma isoform 1                    |
| NM_138956    | Rassf3    | ras association domain-containing protein 3               |
| NM_009826    | Rb1cc1    | RB1-inducible coiled-coil protein 1                       |
| NM_145923    | Rel1      | RELT-like protein 1 precursor                             |
| NM_026380    | Rgs8      | regulator of G-protein signaling 8                        |
| NM_139228    | Rhbdl3    | rhomoid-related protein 3                                 |
| NM_007483    | Rhob      | rho-related GTP-binding protein RhoB precursor            |
| NM_026357    | Ribc2     | RIB43A-like with coiled-coils protein 2                   |
| NM_177158    | Rinl      | ras and Rab interactor-like protein                       |
| NM_024242    | Riok1     | serine/threonine-protein kinase RIO1                      |
| NM_001162863 | Rnase10   | ribonuclease-like protein 10 isoform 2                    |
| NM_013846    | Ror2      | tyrosine-protein kinase transmembrane receptor            |
| NM_026533    | Rps13     | 40S ribosomal protein S13                                 |
| NM_019924    | Rps6ka4   | ribosomal protein S6 kinase alpha-4                       |
| NM_028040    | Rpusd4    | RNA pseudouridylylase domain-containing                   |
| NM_009104    | Rrm2      | ribonucleoside-diphosphate reductase subunit M2           |
| NM_019743    | Rybp      | RING1 and YY1-binding protein                             |
| NM_016741    | Scarb1    | scavenger receptor class B member 1                       |
| NM_011325    | Scnn1b    | amiloride-sensitive sodium channel subunit beta           |
| NM_011348    | Sema3e    | semaphorin-3E precursor                                   |
| NM_023475    | Serhl     | serine hydrolase-like protein                             |
| NM_008458    | Serpina3c | serine protease inhibitor A3C precursor                   |
| NM_018754    | Sfn       | 14-3-3 protein sigma                                      |
| NM_001136080 | Sqca      | alpha-sarcoglycan isoform 1                               |
| NM_001161845 | Sgk1      | serine/threonine-protein kinase Sgk1 isoform A            |
| NM_027921    | Slc16a14  | monocarboxylate transporter 14                            |
| NM_011395    | Slc22a3   | solute carrier family 22 member 3                         |
| NM_018824    | Slc23a2   | solute carrier family 23 member 2                         |
| NM_022880    | Slc29a1   | equilibrative nucleoside transporter 1 isoform            |
| NM_011400    | Slc2a1    | solute carrier family 2, facilitated glucose              |
| NM_009579    | Slc30a1   | zinc transporter 1                                        |
| NM_028123    | Slc37a3   | sugar phosphate exchanger 3                               |
| NM_027052    | Slc38a4   | sodium-coupled neutral amino acid transporter 4           |
| NM_009320    | Slc6a6    | sodium- and chloride-dependent taurine                    |
| NM_007513    | Slc7a1    | high affinity cationic amino acid transporter 1           |
| NM_029949    | Snapc3    | snRNA-activating protein complex subunit 3                |
| NM_175483    | Snx33     | sorting nexin-33                                          |
| NM_007707    | Socs3     | suppressor of cytokine signaling 3                        |
| NM_011434    | Sod1      | superoxide dismutase [Cu-Zn]                              |
| NM_172752    | Sorbs2    | sorbin and SH3 domain-containing protein 2                |
| NM_025312    | Sostdc1   | sclerostin domain-containing protein 1                    |
| NM_009242    | Sparc     | SPARC precursor                                           |
| NM_027609    | Speer4f   | spermatogenesis associated glutamate (E)-rich             |
| NM_001164140 | Spert     | spermatid-associated protein isoform 4                    |
| NM_183284    | Spink2    | serine protease inhibitor Kazal-type 2                    |
| NM_029012    | Spp13     | signal peptide peptidase-like 3                           |
| NM_001025395 | Src       | neuronal proto-oncogene tyrosine-protein kinase           |
| NM_012058    | Srp9      | signal recognition particle 9 kDa protein                 |
| NM_021403    | Srrm3     | serine/arginine repetitive matrix protein 3               |
| NM_010656    | Sspn      | sarcospan                                                 |
| NM_009182    | St8sia3   | sia-alpha-2,3-Gal-beta-1,4-GlcNAc-R:alpha                 |
| NM_025288    | Stfa3     | stefin-3                                                  |
| NM_138649    | Syt17     | synaptotagmin-17                                          |
| NM_031394    | Syt12     | synaptotagmin-like protein 2 isoform 3                    |

|              |                 |                                                 |
|--------------|-----------------|-------------------------------------------------|
| NM_001040435 | Tacc3           | transforming acidic coiled-coil-containing      |
| NM_011530    | Tap2            | antigen peptide transporter 2                   |
| NM_001159907 | Tarbp1          | TAR (HIV-1) RNA binding protein 1               |
| NM_172310    | Tarsl2          | probable threonyl-tRNA synthetase 2,            |
| NM_175225    | Tasp1           | threonine aspartase 1 isoform a                 |
| NM_019636    | Tbc1d1          | TBC1 domain family member 1                     |
| NM_001163455 | Tbck            | TBC domain-containing protein kinase-like       |
| NM_011544    | Tcf12           | transcription factor 12                         |
| NM_031182    | Tcfap4          | transcription factor AP-4                       |
| NM_023755    | Tcfcp211        | transcription factor CP2-like protein 1         |
| NM_172605    | Tdrd3           | tudor domain-containing protein 3               |
| NM_011902    | Tekt2           | tektin-2                                        |
| NM_009357    | Tex261          | protein TEX261                                  |
| NM_177588    | Thns11          | threonine synthase-like 1 isoform a             |
| NM_011597    | Tjp2            | tight junction protein ZO-2 isoform 2           |
| NM_019725    | Tle2            | transducin-like enhancer protein 2              |
| NM_025453    | Tm4sf20         | transmembrane 4 L6 family member 20             |
| NM_172051    | Tmcc3           | transmembrane and coiled-coil domains protein 3 |
| NM_028336    | Tmem107         | transmembrane protein 107 isoform 2             |
| NM_018872    | Tmem131         | transmembrane protein 131                       |
| NM_177260    | Tmem154         | transmembrane protein 154 precursor             |
| NM_001081283 | Tmem28          | transmembrane protein FAM155B                   |
| NM_001163172 | Tmem92          | transmembrane protein 92 isoform 1              |
| NM_198967    | Tmtc1           | transmembrane and TPR repeat-containing protein |
| NM_011607    | Tnc             | tenascin                                        |
| NM_009397    | Tnfaip3         | tumor necrosis factor alpha-induced protein 3   |
| NM_001159503 | Tnfsf12-Tnfsf13 | tumor necrosis factor (ligand) superfamily,     |
| NM_001110147 | Tnk2            | activated CDC42 kinase 1 isoform 2              |
| NM_001130180 | Tnnt2           | troponin T, cardiac muscle isoform e            |
| NM_178242    | Tnrc18          | trinucleotide repeat-containing gene 18 protein |
| NM_020507    | Tob2            | protein Tob2                                    |
| NM_011906    | Tpra1           | transmembrane protein adipocyte-associated 1    |
| NM_194343    | Trim45          | tripartite motif-containing protein 45 isoform  |
| NM_178110    | Trim62          | tripartite motif-containing protein 62          |
| NM_001160412 | Triml2          | tripartite motif family-like 2                  |
| NM_001085421 | Tsply5          | testis-specific Y-encoded-like protein 5        |
| NM_027238    | Ttc39b          | tetratricopeptide repeat protein 39B            |
| NM_029264    | Ttl10           | protein polyglycolase TTL10                     |
| NM_017379    | Tuba8           | tubulin alpha-8 chain                           |
| NM_019913    | Txn2            | thioredoxin, mitochondrial precursor            |
| NM_010633    | Uhmk1           | serine/threonine-protein kinase Kist            |
| NM_026031    | Utp111          | probable U3 small nucleolar RNA-associated      |
| NM_011694    | Vdac1           | voltage-dependent anion-selective channel       |
| NM_172255    | Wdr11           | WD repeat-containing protein 11                 |
| NM_145514    | Wdr26           | WD repeat-containing protein 26                 |
| NM_030215    | Wmip1           | ATPase WRNIP1                                   |
| NM_019653    | Wsb1            | WD repeat and SOCS box-containing protein 1     |
| NM_011724    | Xirp1           | xin actin-binding repeat-containing protein 1   |
| NM_001005341 | Ypel2           | protein yippee-like 2                           |
| NM_011740    | Ywhaz           | 14-3-3 protein zeta/delta                       |
| NM_001122676 | Zcchc2          | zinc finger CCHC domain-containing protein 2    |
| NM_001033261 | Zfc3h1          | proline/serine-rich coiled-coil 2               |
| NM_199029    | Zfp395          | zinc finger protein 395                         |
| NM_172867    | Zfp462          | zinc finger protein 462                         |
| NM_201609    | Zfp652          | zinc finger protein 652                         |
| NM_001146000 | Zfp710          | zinc finger protein 710 isoform b               |
| NM_153194    | Zfp740          | zinc finger protein 740                         |
| NM_172919    | Zfp846          | zinc finger protein 846                         |
| NM_145456    | Zswim6          | zinc finger SWIM domain-containing protein 6    |
| NM_001045536 | Zzef1           | zinc finger ZZ-type and EF-hand                 |
| NM_025319    | 0610009B22Rik   | hypothetical protein LOC66050                   |
| NM_001164210 | 1110032A04Rik   | small subunit of serine palmitoyltransferase B  |
| NM_001081005 | 1500012F01Rik   | hypothetical protein LOC68949                   |
| NM_024283    | 1500015O10Rik   | augurin precursor                               |
| NM_027063    | 1700013G24Rik   | hypothetical protein LOC69380                   |
| NM_027966    | 1700019O17Rik   | hypothetical protein LOC71863                   |
| NR_003953    | 1700022A21Rik   |                                                 |
| NM_027970    | 1700023E05Rik   | hypothetical protein LOC71868                   |
| NR_027909    | 1700029M20Rik   |                                                 |
| NM_028851    | 1700080O16Rik   | hypothetical protein LOC74279                   |
| NM_133998    | 1810008A18Rik   | hypothetical protein LOC108707                  |
| NM_027129    | 2310035K24Rik   | hypothetical protein LOC69596                   |
| NM_025621    | 2310050C09Rik   | hypothetical protein LOC66533                   |
| NM_001007581 | 2810408M09Rik   | hypothetical protein LOC381406                  |
| NR_015489    | 2900041M22Rik   |                                                 |
| NR_030715    | 3930402G23Rik   |                                                 |
| NR_015510    | 4632427E13Rik   |                                                 |
| NM_172500    | 4831426I19Rik   | nesprin-3 isoform beta                          |
| NM_029440    | 4930434E21Rik   | hypothetical protein LOC381693                  |
| NR_015535    | 4930567H12Rik   |                                                 |
| NM_001145759 | 4930571K23Rik   | hypothetical protein LOC75861                   |
| NR_027879    | 4930583K01Rik   |                                                 |
| NM_001081063 | 4933401F05Rik   | serine protease 55 precursor                    |
| NM_028908    | 4933403G14Rik   | hypothetical protein LOC74393                   |
| NM_001081101 | 4933407H18Rik   | hypothetical protein LOC71101                   |
| NR_027843    | 4933432I09Rik   |                                                 |
| NM_176921    | 6030419C18Rik   | hypothetical protein LOC319477                  |
| NM_172859    | 6330439K17Rik   | ankyrin repeat-containing protein C20orf12      |
| NM_026377    | 6330577E15Rik   | hypothetical protein LOC67788                   |
| NM_145836    | 6430527G18Rik   | enhanced at puberty protein 1                   |
| NR_015553    | 9430076C15Rik   |                                                 |



## DISTAL(&gt;50kb)

| Transcript Name | Gene name     | Gene Description                                 |
|-----------------|---------------|--------------------------------------------------|
| NM_001081067    | A1bg          | alpha-1B-glycoprotein precursor                  |
| NM_177039       | A530016L24Rik | transmembrane protein C14orf180 homolog          |
| NM_025271       | Act17b        | actin-like protein 7B                            |
| NM_007396       | Acvr2a        | activin receptor type-2A precursor               |
| NM_009623       | Adcy8         | adenylate cyclase type 8                         |
| NM_020332       | Ank           | progressive ankylosis protein                    |
| NM_001080933    | Ankfn1        | ankyrin repeat and fibronectin type-III          |
| NM_001167883    | Ankrd50       | ankyrin repeat domain 50                         |
| NM_007481       | Arf6          | ADP-ribosylation factor 6                        |
| NM_183019       | Arhgef4       | rho guanine nucleotide exchange factor 4         |
| NM_007487       | Arl4a         | ADP-ribosylation factor-like protein 4A          |
| NM_001042592    | Aradc4        | arrestin domain containing 4 isoform 1           |
| NM_176999       | Atp10b        | probable phospholipid-transporting ATPase VB     |
| NM_007502       | Atp1b3        | sodium/potassium-transporting ATPase subunit     |
| NM_175015       | Atp5g3        | ATP synthase lipid-binding protein,              |
| NM_001001488    | Atp8b1        | probable phospholipid-transporting ATPase IC     |
| NM_015732       | Axin2         | axin-2                                           |
| NM_001102458    | Azin1         | antizyme inhibitor 1                             |
| NM_001033350    | Bank1         | B-cell scaffold protein with ankyrin repeats     |
| NM_016812       | Banp          | protein BANP isoform 2                           |
| NM_130452       | Bbox1         | gamma-butyrobetaine dioxygenase                  |
| NM_013867       | Bcar3         | breast cancer anti-estrogen resistance protein   |
| NM_007553       | Bmp2          | bone morphogenetic protein 2 precursor           |
| NM_007557       | Bmp7          | bone morphogenetic protein 7 precursor           |
| NM_028472       | Bmper         | BMP-binding endothelial regulator protein        |
| NM_009782       | Cacna1e       | voltage-dependent R-type calcium channel subunit |
| NM_018770       | Cadm1         | cell adhesion molecule 1 isoform c               |
| NM_001160399    | Ccdc112       | coiled-coil domain-containing protein 112        |
| NM_201362       | Ccdc68        | coiled-coil domain-containing protein 68         |
| NM_009866       | Cdh11         | cadherin-11 preproprotein                        |
| NM_198656       | Cdh26         | cadherin-like protein 26 precursor               |
| NM_009868       | Cdh5          | cadherin-5 precursor                             |
| NM_144536       | Cdkal1        | CDK5 regulatory subunit-associated protein       |
| NM_001024624    | Cdkl5         | cyclin-dependent kinase-like 5                   |
| NM_029976       | Cdkn2aipnl    | CDKN2AIP N-terminal-like protein                 |
| NM_028850       | Chic2         | cysteine-rich hydrophobic domain 2 protein       |
| NM_009893       | Chrd          | chordin precursor                                |
| NM_027998       | Cldn23        | claudin-23                                       |
| NM_173422       | Colec10       | collectin-10 precursor                           |
| NM_133805       | Cops8         | COP9 signalosome complex subunit 8               |
| NM_025815       | Cpne8         | copine-8 isoform 1                               |
| NM_001080809    | Cps1          | carbamoyl-phosphate synthase [ammonia],          |
| NM_010217       | Ctgf          | connective tissue growth factor precursor        |
| NM_021704       | Cxcl12        | stromal cell-derived factor 1 isoform alpha      |
| NM_144853       | Cyrr1         | cysteine and tyrosine-rich protein 1 precursor   |
| NM_001109990    | D0H4S114      | neuronal protein 3.1                             |
| NM_001008702    | Dab2          | disabled homolog 2 isoform b                     |
| NM_029653       | Dapk1         | death-associated protein kinase 1                |
| NM_019967       | Dbc1          | deleted in bladder cancer protein 1 homolog      |
| NM_173419       | Dleu7         | leukemia-associated protein 7 homolog            |
| NM_007862       | Dlq1          | disks large homolog 1                            |
| NM_029297       | Dynlrb2       | dynein light chain roadblock-type 2              |
| NM_001014390    | Dyrk2         | dual specificity                                 |
| NM_021469       | Dysf          | dysferlin isoform 1                              |
| NM_010104       | Edn1          | endothelin-1 precursor                           |
| NM_001001932    | Eea1          | early endosome antigen 1                         |
| NM_025769       | Efcab1        | EF-hand calcium-binding domain-containing        |
| NM_010111       | Efnb2         | ephrin-B2 precursor                              |
| NM_025829       | Eif4e3        | eukaryotic translation initiation factor 4E type |
| NM_007930       | Enc1          | ectoderm-neural cortex protein 1                 |
| NM_013511       | Epb4.1l2      | band 4.1-like protein 2                          |
| NM_007961       | Etv6          | transcription factor ETV6                        |
| NM_010164       | Eya1          | eyes absent homolog 1                            |
| NM_173426       | Fam110b       | hypothetical protein LOC242297                   |
| NM_134096       | Fam19a5       | TAF45 protein                                    |
| NM_019995       | Fam48a        | family with sequence similarity 48, member A     |
| NM_178390       | Fam53a        | dorsal neural-tube nuclear protein               |
| NM_201361       | Fam82a1       | regulator of microtubule dynamics protein 2      |
| NM_001045518    | Fam83b        | hypothetical protein LOC208994                   |
| NM_001033980    | Fam92b        | hypothetical protein LOC436062                   |
| NM_183221       | Fat4          | protocadherin Fat 4 precursor                    |
| NM_198029       | Fermt1        | fermitin family homolog 1                        |
| NM_201601       | Fgfr2         | fibroblast growth factor receptor 2 isoform      |
| NM_001113412    | Fggy          | FGGY carbohydrate kinase domain-containing       |
| NM_201518       | Flrt2         | fibronectin leucine rich transmembrane protein   |
| NM_207636       | Fndc3a        | fibronectin type-III domain-containing protein   |
| NM_019739       | Foxo1         | forkhead box protein O1                          |
| NM_008239       | Foxq1         | forkhead box protein Q1                          |
| NM_008057       | Fzd7          | frizzled-7 precursor                             |
| NM_011817       | Gadd45g       | growth arrest and DNA damage-inducible protein   |
| NM_008082       | Galn1         | galanin receptor type 1                          |
| NM_030719       | Gatsl2        | GATS-like protein 2                              |
| NM_010267       | Gdap1         | ganglioside-induced differentiation-associated   |
| NM_008115       | Gfra2         | GDNF family receptor alpha-2                     |
| NM_008131       | Glul          | glutamine synthetase                             |
| NM_001005422    | Gm1574        | hypothetical protein LOC380842                   |
| NM_001005420    | Gm347         | hypothetical protein LOC241289                   |
| NM_001033266    | Gm525         | hypothetical protein LOC217071 precursor         |
| NM_001033411    | Gm826         | hypothetical protein LOC329554                   |
| NM_008149       | Gpm           | glycerol-3-phosphate acyltransferase 1,          |
| NM_001002268    | Gpr126        | G-protein coupled receptor 126 precursor         |
| NM_025325       | Haao          | 3-hydroxyanthranilate 3,4-dioxygenase            |

|              |            |                                                  |
|--------------|------------|--------------------------------------------------|
| NM_008216    | Has2       | hyaluronan synthase 2                            |
| NM_010437    | Hivep2     | transcription factor HIVEP2                      |
| NM_010481    | Hspa9      | stress-70 protein, mitochondrial                 |
| NM_019960    | Hspb3      | heat shock protein beta-3                        |
| NM_008316    | Hus1       | checkpoint protein HUS1                          |
| NM_010496    | Id2        | DNA-binding protein inhibitor ID-2               |
| NM_008343    | Igfbp3     | insulin-like growth factor-binding protein 3     |
| NM_008381    | Inhbb      | inhibin beta B chain precursor                   |
| NM_133748    | Insiq2     | insulin-induced gene 2 protein isoform 1         |
| NM_010573    | Irx1       | iroquois-class homeodomain protein IRX-1         |
| NM_010574    | Irx2       | iroquois-class homeodomain protein IRX-2         |
| NM_008393    | Irx3       | iroquois-class homeodomain protein IRX-3         |
| NM_013822    | Jag1       | protein jagged-1 precursor                       |
| NM_001102670 | Kbtbd8     | kelch repeat and BTB domain-containing protein 8 |
| NM_013692    | Klf10      | Krueppel-like factor 10                          |
| NM_001166659 | Lekr1      | leucine, glutamate and lysine rich 1 isoform 1   |
| NM_001081298 | Lphn2      | latrophilin-2                                    |
| NM_178725    | Lrrc4c     | leucine-rich repeat-containing protein 4C        |
| NM_001025577 | Maf        | transcription factor Maf                         |
| NM_008548    | Man1a      | mannosyl-oligosaccharide 1,2-alpha-mannosidase   |
| NM_011945    | Map3k1     | mitogen-activated protein kinase kinase kinase   |
| NM_016700    | Mapk8      | mitogen-activated protein kinase 8               |
| NM_001146176 | Max        | protein max isoform 2                            |
| NM_020007    | Mbn1       | muscleblind-like protein 1                       |
| NM_008560    | Mc2r       | adrenocorticotrophic hormone receptor            |
| NM_001024703 | Mctp2      | multiple C2 and transmembrane domain-containing  |
| NR_029540    | Mir125b-2  |                                                  |
| NR_029719    | Mir148a    |                                                  |
| NM_008604    | Mme        | nepriylisin                                      |
| NM_001113374 | Mocs2      | molybdopterin synthase sulfur carrier subunit    |
| NM_010820    | Mpdz       | multiple PDZ domain protein                      |
| NM_016804    | Mtx2       | metaxin-2                                        |
| NM_153789    | Myliip     | E3 ubiquitin-protein ligase MYLIP isoform 1      |
| NM_001166030 | Mylk4      | myosin light chain kinase family member 4        |
| NM_176957    | Nckap5     | Nck-associated protein 5 isoform 3               |
| NM_022996    | Ndfip1     | NEDD4 family-interacting protein 1               |
| NM_028757    | Nebi       | nebulin                                          |
| NM_010894    | Neurod1    | neurogenic differentiation factor 1              |
| NM_153079    | Nmur2      | neuromedin-U receptor 2                          |
| NM_023456    | Npy        | neuropeptide Y precursor                         |
| NM_011851    | Nt5e       | 5'-nucleotidase precursor                        |
| NM_172290    | Ntm        | neurotrimin precursor                            |
| NM_027722    | Nudt4      | diphosphoinositol polyphosphate phosphohydrolase |
| NM_028696    | Obfc2a     | SOSS complex subunit B2                          |
| NM_011857    | Odz3       | teneurin-3 isoform 1                             |
| NM_011019    | Osmr       | oncostatin-M-specific receptor subunit beta      |
| NM_001081164 | Otud4      | OTU domain-containing protein 4                  |
| NM_011033    | Pabpc2     | poly A binding protein, cytoplasmic 2            |
| NM_181402    | Parp11     | poly [ADP-ribose] polymerase 11                  |
| NM_008781    | Pax3       | paired box protein Pax-3 isoform a               |
| NM_008783    | Pbx1       | pre-B-cell leukemia transcription factor 1       |
| NM_009344    | Phlda1     | pleckstrin homology-like domain family A member  |
| NM_001024955 | Pik3r1     | phosphatidylinositol 3-kinase regulatory subunit |
| NR_003202    | Pinc       |                                                  |
| NM_011097    | Pitx1      | pituitary homeobox 1                             |
| NM_001083110 | Pja1       | E3 ubiquitin-protein ligase Praja-1 isoform 1    |
| NM_153179    | Pkhd1      | polyductin                                       |
| NM_008869    | Pla2g4a    | cytosolic phospholipase A2                       |
| NM_018797    | Plxnc1     | plexin-C1 precursor                              |
| NM_080555    | Ppap2b     | lipid phosphate phosphohydrolase 3               |
| NM_177741    | Ppp1r3b    | protein phosphatase 1 regulatory subunit 3B      |
| NM_177698    | Psd3       | PH and SEC7 domain-containing protein 3 isoform  |
| NM_019550    | Ptbp2      | polypyrimidine tract-binding protein 2           |
| NM_008960    | Pten       | phosphatidylinositol-3,4,5-trisphosphate         |
| NM_008966    | Ptqfr      | prostaglandin F2-alpha receptor                  |
| NM_011201    | Ptpn1      | tyrosine-protein phosphatase non-receptor type   |
| NM_001081432 | Ptprq      | phosphotidylinositol phosphatase PTPRQ           |
| NM_021424    | Pvrl1      | poliovirus receptor-related protein 1 precursor  |
| NM_001163303 | Pxmp3      | peroxisome biogenesis factor 2                   |
| NM_027455    | Qpc1       | glutaminy-peptide cyclotransferase precursor     |
| NM_011246    | Rasgrp1    | RAS guanyl-releasing protein 1                   |
| NM_001080928 | Rbpj       | recombining binding protein suppressor of        |
| NM_178606    | Reep3      | receptor expression-enhancing protein 3          |
| NM_009061    | Rqs2       | regulator of G-protein signaling 2               |
| NM_178779    | Rnf152     | RING finger protein 152                          |
| NM_025974    | Rpl14      | 60S ribosomal protein L14                        |
| NM_011297    | Rps24      | 40S ribosomal protein S24 isoform 1              |
| NM_017475    | Rragc      | ras-related GTP-binding protein C                |
| NM_172769    | Sc5d       | lathosterol oxidase                              |
| NM_030261    | Sesn3      | sestrin-3                                        |
| NM_009144    | Sfrp2      | secreted frizzled-related protein 2 precursor    |
| NM_013665    | Shox2      | short stature homeobox protein 2                 |
| NM_181590    | Shq1       | protein SHQ1 homolog                             |
| NM_015829    | Slc25a13   | calcium-binding mitochondrial carrier protein    |
| NM_001033286 | Slc30a10   | zinc transporter 10                              |
| NM_022885    | Slc30a5    | zinc transporter 5                               |
| NM_175121    | Slc38a2    | sodium-coupled neutral amino acid transporter 2  |
| NM_009208    | Slc4a3     | anion exchange protein 3                         |
| NM_011415    | Snai2      | zinc finger protein SNAI2                        |
| NM_028874    | Snrx19     | sorting nexin-19                                 |
| NM_025696    | Sorcs3     | VPS10 domain-containing receptor SorCS3          |
| NM_011436    | Sorl1      | sortilin-related receptor                        |
| NM_001098425 | Sp3        | transcription factor Sp3 isoform 2               |
| NR_001582    | Speer5-ps1 |                                                  |
| NM_033523    | Spred2     | sprouty-related, EVH1 domain-containing protein  |

|              |               |                                                 |
|--------------|---------------|-------------------------------------------------|
| NM_011372    | St6galnac3    | alpha-N-acetylgalactosaminide                   |
| NM_027399    | Steap1        | metalloreductase STEAP1                         |
| NM_054098    | Steap4        | metalloreductase STEAP4                         |
| NM_138667    | Tab2          | TGF-beta-activated kinase 1 and MAP3K7-binding  |
| NM_177089    | Tacc1         | transforming acidic coiled-coil-containing      |
| NM_030732    | Tbl1xr1       | F-box-like/WD repeat-containing protein TBL1XR1 |
| NM_013685    | Tcf4          | transcription factor 4 isoform a                |
| NM_207176    | Tes           | testin                                          |
| NM_009371    | Tgfbr2        | TGF-beta receptor type-2 isoform 1              |
| NM_001164074 | Tgif1         | homeobox protein TGIF1 isoform c                |
| NM_011580    | Thbs1         | thrombospondin-1                                |
| NM_011581    | Thbs2         | thrombospondin-2 precursor                      |
| NM_178413    | Thnsl2        | threonine synthase-like 2                       |
| NM_012033    | Tinag         | tubulointerstitial nephritis antigen            |
| NM_001163574 | Tjp1          | tight junction protein ZO-1 isoform 2           |
| NM_001083928 | Tle3          | transducin-like enhancer protein 3 isoform 3    |
| NM_178056    | Tm2d3         | TM2 domain-containing protein 3 isoform 2       |
| NM_015775    | Tmprss2       | transmembrane protease serine 2                 |
| NM_177368    | Tmtc2         | transmembrane and TPR repeat-containing protein |
| NM_028339    | Tmx1          | thioredoxin-related transmembrane protein 1     |
| NM_183391    | Tnfrsf18      | tumor necrosis factor (ligand) superfamily,     |
| NM_009408    | Top1          | DNA topoisomerase 1                             |
| NM_144549    | Trib1         | tribbles homolog 1                              |
| NM_030706    | Trim2         | tripartite motif-containing protein 2           |
| NM_001039104 | Trpm1         | transient receptor potential cation channel     |
| NM_001081300 | Tshz1         | teashirt homolog 1                              |
| NM_029321    | Ttc32         | tetratricopeptide repeat protein 32             |
| NM_028283    | Uaca          | uveal autoantigen with coiled-coil domains and  |
| NM_183225    | Usp24         | ubiquitin carboxyl-terminal hydrolase 24        |
| NM_144826    | Utp6          | U3 small nucleolar RNA-associated protein 6     |
| NM_027614    | Wdr20b        | WD repeat-containing protein 20                 |
| NM_080848    | Wdr5          | WD repeat-containing protein 5                  |
| NM_001014981 | Wdr7          | WD repeat-containing protein 7                  |
| NM_028599    | Wdr75         | WD repeat-containing protein 75                 |
| NM_026858    | Xrcc6bp1      | mitochondrial inner membrane protease ATP23     |
| NM_023311    | Yipf5         | protein YIPF5                                   |
| NM_022985    | Zfand6        | AN1-type zinc finger protein 6                  |
| NM_146224    | Zfp280d       | zinc finger protein 280D                        |
| NM_001001806 | Zfp3612       | zinc finger protein 36, C3H1 type-like 2        |
| NM_183033    | Zfp516        | zinc finger protein 516                         |
| NM_145492    | Zfp521        | zinc finger protein 521                         |
| NM_175751    | Zfp608        | zinc finger protein 608                         |
| NM_134054    | 1110002B05Rik | small subunit of serine palmitoyltransferase A  |
| NM_001145198 | 1500009L16Rik | hypothetical protein LOC69784                   |
| NM_177718    | 1600021P15Rik | hypothetical protein LOC239796                  |
| NR_027968    | 1700020N01Rik |                                                 |
| NM_026931    | 1810011O10Rik | thyroid cancer-1                                |
| NM_001081236 | 2410131K14Rik | hypothetical protein LOC76792 precursor         |
| NR_015556    | 2610035D17Rik |                                                 |
| NR_015579    | 2810032G03Rik |                                                 |
| NR_015605    | 2900052N01Rik |                                                 |
| NM_027637    | 4931428L18Rik |                                                 |
| NR_015512    | 4933406K04Rik |                                                 |
| NM_027668    | 4933412E24Rik | hypothetical protein LOC71088                   |
| NM_001081963 | 9430020K01Rik | hypothetical protein LOC240185                  |
